# Supplementary material for: Rapid geographical source attribution of Salmonella enterica serovar Enteritidis genomes using hierarchical machine learning
Source: eLife journal article supplement (doi:10.7554/elife.84167), 2023-04-12

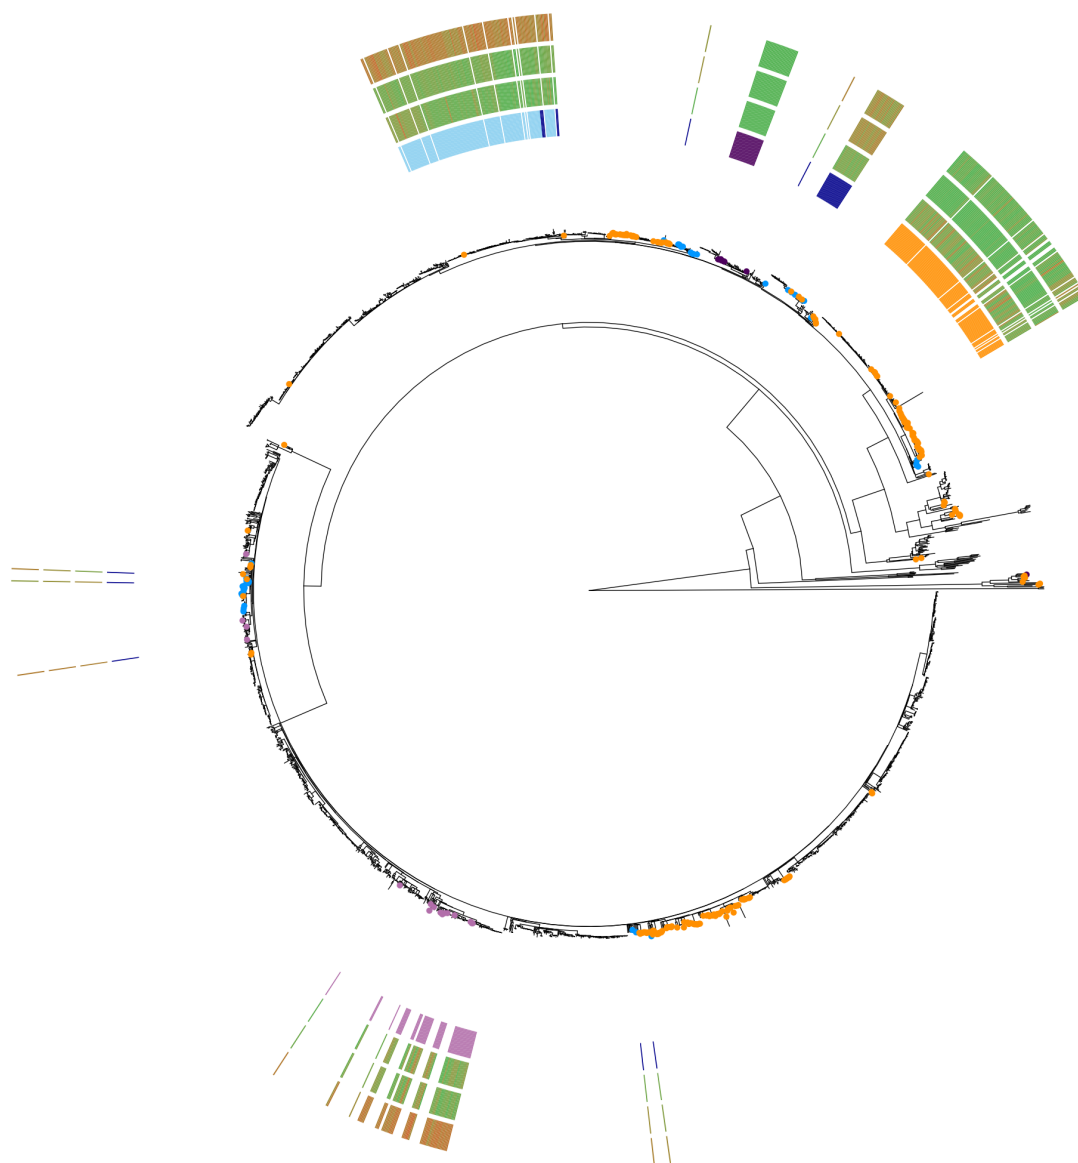

### Training

- Poland
- Singapore
- South Africa
- Spain

### Validation

- NCBI Poland
- NCBI Singapore
- NCBI South Africa
- Poland
- Spain

### Probability

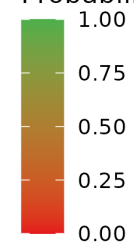

Supplement: supp [file elife_poa_e84167_Figure_5_figure_supplement_5.pdf › elife_poa_e84167_Figure_5_figure_supplement_5.pdf]
