# Supplementary material for: Rapid geographical source attribution of Salmonella enterica serovar Enteritidis genomes using hierarchical machine learning
Source: eLife. 2023 Apr 12;12:e84167. doi: 10.7554/eLife.84167 (PMC10147375; doi:10.7554/eLife.84167)
Supplement: Supplementary file 1. — (A) Summary of S. Enteritidis isolates collected by the UKHSA from UK clinical patients who recently reported foreign travel to 38 individual country classes. Each panel contains a bar chart of isolate counts per year per country class. (B) Summary of the all-vs-all comparison of classifier vs resampler models used to identify the most suitable combinations for feature selection and additional optimization. The implemented resampling schemes included downsampling (smallest class), upsampling (largest class), resampling to the mean count of all classes, and hierarchically aware implementation for the previously described samplers. Hierarchically aware resampling was developed using in-house scripts to iteratively apply a resampler to each of the lowest levels of the hierarchy (country) before passing the resampled data to higher levels in the hierarchy for further resampling. Abbreviations; RF: Random Forest, KNN: K Nearest Neighbour, SVM: Support Vector Machine, GNB: Gaussian Naïve Bayes, and XGB: Xtreme Gradient Boosting. (C) The 2313 Salmonella Enteritidis sample collection was used for training and testing of the hML classifier presented in the main manuscript. All samples were collected by the UKHSA as a part of their genomic surveillance initiative. Recently recorded travel was collected as a part of the UKHSA’s ‘enhanced surveillance’ program. The columns include: SRA accession code, receipt date of isolate, SNP Address, reported country of travel, subregion, and region that the country lies within based on the UN M49 Standard for regional codes. (D) Validation dataset genomic collection and associated metadata. [file elife-84167-supp1.xlsx]

## Sheet: Table S1A
	precision	recall	f1-score	support
Barbados	1	0.67	0.8	3
Bulgaria	0.22	0.25	0.24	8
Cape Verde	1	0.6	0.75	5
China	0.7	0.64	0.67	11
Cuba	1	1	1	36
Cyprus	0.5	0.5	0.5	6
Czech republic	0	0	0	2
Dominica	0	0	0	3
Dominican republic	0.86	0.96	0.91	25
Egypt	0.89	0.98	0.94	60
France	0	0	0	3
Greece	0.88	0.5	0.64	14
Hungary	0	0	0	5
India	0.7	0.54	0.61	13
Indonesia	0.71	0.92	0.8	13
Italy	0	0	0	3
Jamaica	1	1	1	7
Kenya	0.5	0.71	0.59	7
Malaysia	0.44	0.57	0.5	7
Malta	1	0.86	0.92	7
Mexico	0.95	0.9	0.93	21
Morocco	0.82	0.82	0.82	11
Pakistan	1	0.5	0.67	2
Poland	0.41	0.47	0.44	15
Portugal	0.67	0.29	0.4	7
Russian federation	1	0.67	0.8	3
Saudi arabia	0.5	0.67	0.57	6
Singapore	0.5	0.17	0.25	6
South africa	1	0.5	0.67	2
Spain	0.69	0.99	0.81	69
Sri Lanka	0.8	0.8	0.8	5
Tanzania	1	0.67	0.8	3
Thailand	0.93	0.78	0.85	18
Tunisia	1	0.91	0.95	11
Turkey	0.96	0.93	0.95	138
Arab Emirates	0.87	0.81	0.84	16
United States	0	0	0	4
Vietnam	1	0.5	0.67	4
accuracy	0.82			579
macro avg	0.67	0.58	0.61	579
weighted avg	0.81	0.82	0.8	579

## Sheet: Table S1B
classifier	resampler	macroR	macroP	macroF1	microR	microP	microF1	hR	hP	hF1	hAcc	time
RF	NoResampling	0.717	0.709	0.713	0.857	0.821	0.838	0.849	0.892	0.87	0.87	110.872
RF	RandomUnderSampler	0.57	0.662	0.612	0.511	0.699	0.59	0.487	0.775	0.598	0.582	440.603
RF	RandomOverSampler	0.74	0.744	0.742	0.857	0.841	0.849	0.85	0.903	0.876	0.877	801.726
RF	Balancing_mean	0.708	0.703	0.706	0.756	0.794	0.774	0.745	0.87	0.803	0.794	840.412
RF	HierMean	0.69	0.649	0.669	0.683	0.69	0.686	0.666	0.788	0.722	0.712	2490.54
ExtraTrees	NoResampling	0.738	0.727	0.733	0.868	0.826	0.846	0.861	0.897	0.878	0.881	94.545
ExtraTrees	RandomUnderSampler	0.65	0.568	0.606	0.606	0.605	0.605	0.572	0.707	0.633	0.633	382.681
ExtraTrees	RandomOverSampler	0.732	0.733	0.733	0.862	0.828	0.845	0.855	0.897	0.876	0.88	808.948
ExtraTrees	Balancing_mean	0.729	0.697	0.713	0.785	0.796	0.79	0.774	0.872	0.82	0.807	911.307
ExtraTrees	HierMean	0.698	0.672	0.685	0.732	0.739	0.735	0.718	0.827	0.769	0.746	2463.55
KNN	NoResampling	0.589	0.582	0.585	0.753	0.701	0.726	0.737	0.805	0.77	0.755	31.787
KNN	RandomUnderSampler	0.446	0.476	0.461	0.373	0.531	0.438	0.332	0.603	0.428	0.385	360.199
KNN	RandomOverSampler	0.702	0.541	0.611	0.744	0.605	0.667	0.71	0.717	0.714	0.712	664.673
KNN	Balancing_mean	0.646	0.474	0.547	0.586	0.477	0.526	0.522	0.572	0.546	0.538	761.527
KNN	HierMean	0.618	0.447	0.519	0.548	0.432	0.483	0.5	0.543	0.521	0.52	2160.47
SVM	NoResampling	0.474	0.509	0.491	0.674	0.669	0.671	0.655	0.779	0.711	0.684	1667.75
SVM	RandomUnderSampler	0.174	0.586	0.268	0.137	0.7	0.229	0.136	0.703	0.229	0.3	377.683
SVM	RandomOverSampler	0.661	0.643	0.652	0.682	0.691	0.686	0.664	0.779	0.717	0.732	56366.9
SVM	Balancing_mean	0.468	0.559	0.51	0.401	0.578	0.473	0.386	0.598	0.469	0.517	2471.14
SVM	HierMean	0.456	0.568	0.506	0.362	0.563	0.441	0.347	0.601	0.44	0.489	4029.17
GNB	NoResampling	0.557	0.489	0.521	0.734	0.579	0.648	0.706	0.706	0.706	0.706	50.79
GNB	RandomUnderSampler	0.605	0.407	0.487	0.587	0.416	0.487	0.506	0.506	0.506	0.506	366.194
GNB	RandomOverSampler	0.552	0.481	0.514	0.731	0.576	0.644	0.703	0.703	0.703	0.703	1008.66
GNB	Balancing_mean	0.571	0.454	0.506	0.696	0.534	0.604	0.667	0.667	0.667	0.667	896.942
GNB	HierMean	0.585	0.451	0.509	0.681	0.516	0.587	0.653	0.653	0.653	0.653	2511.27
XGB	NoResampling	0.736	0.689	0.712	0.86	0.786	0.821	0.851	0.869	0.86	0.863	4864.93
XGB	RandomUnderSampler	0.628	0.524	0.571	0.579	0.536	0.557	0.535	0.639	0.583	0.591	3944.03
XGB	RandomOverSampler	0.767	0.711	0.738	0.873	0.799	0.835	0.864	0.877	0.87	0.874	14097.3
XGB	Balancing_mean	0.762	0.661	0.708	0.816	0.735	0.773	0.801	0.829	0.815	0.813	5608.9
XGB	HierMean	0.746	0.641	0.689	0.769	0.685	0.725	0.749	0.791	0.769	0.761	7156.25

## Sheet: Table S1C
SRA Accession	RECEIPT date	SNP address	Country	Region	Subregion
SRR8667277	2019-02-20	1.2.3.18.180.180.12747	Barbados	Americas	Latin America and the Caribbean
SRR8691693	2019-02-20	1.2.3.18.180.180.12776	Barbados	Americas	Latin America and the Caribbean
SRR1967763	2014-05-21	1.2.3.18.365.1120.1889	Barbados	Americas	Latin America and the Caribbean
SRR8369264	2018-07-31	1.5.11.2045.2843.3591.10052	Barbados	Americas	Latin America and the Caribbean
SRR6922673	2017-01-27	1.5.11.2045.2843.3591.6906	Barbados	Americas	Latin America and the Caribbean
SRR5220509	2015-05-13	1.5.11.296.296.1951.2805	Barbados	Americas	Latin America and the Caribbean
SRR6901034	2017-02-21	1.5.11.296.296.3642.6998	Barbados	Americas	Latin America and the Caribbean
SRR7892287	2018-01-04	1.5.11.296.296.3642.9180	Barbados	Americas	Latin America and the Caribbean
SRR5632870	2017-05-03	1.5.11.296.296.3734.7233	Barbados	Americas	Latin America and the Caribbean
SRR3286628	2015-04-08	1.5.11.296.296.858.1093	Barbados	Americas	Latin America and the Caribbean
SRR1957747	2014-09-10	1.1.2.12.12.2866.810	Bulgaria	Europe	Eastern Europe
SRR1967706	2014-08-01	1.1.2.12.12.590.1520	Bulgaria	Europe	Eastern Europe
SRR3285355	2015-10-20	1.1.2.12.12.590.3896	Bulgaria	Europe	Eastern Europe
SRR5220458	2015-10-12	1.1.2.12.12.665.3750	Bulgaria	Europe	Eastern Europe
SRR7867061	2018-07-25	1.1.2.12.421.429.6692	Bulgaria	Europe	Eastern Europe
SRR8272525	2018-09-10	1.1.2.12.421.4553.11672	Bulgaria	Europe	Eastern Europe
SRR8249716	2018-11-13	1.1.2.1326.574.3711.12445	Bulgaria	Europe	Eastern Europe
SRR6918623	2016-09-05	1.1.2.1674.2421.3017.5471	Bulgaria	Europe	Eastern Europe
SRR7292885	2015-07-08	1.11.48.1059.1734.2035.3050	Bulgaria	Europe	Eastern Europe
SRR1958539	2014-09-26	1.11.48.154.1148.1301.1755	Bulgaria	Europe	Eastern Europe
SRR8711843	2015-09-07	1.11.48.154.1148.1301.3492	Bulgaria	Europe	Eastern Europe
SRR1958537	2014-09-23	1.11.48.154.154.154.154	Bulgaria	Europe	Eastern Europe
SRR8087178	2018-09-27	1.11.48.154.4007.5622.12040	Bulgaria	Europe	Eastern Europe
SRR6920194	2017-09-13	1.11.48.2338.3182.4113.8403	Bulgaria	Europe	Eastern Europe
SRR5220649	2016-06-20	1.11.48.68.2221.2740.4847	Bulgaria	Europe	Eastern Europe
SRR8548734	2017-08-21	1.11.660.2325.3119.4003.8046	Bulgaria	Europe	Eastern Europe
SRR6918310	2017-09-13	1.11.660.2325.3119.4003.8298	Bulgaria	Europe	Eastern Europe
SRR6919807	2017-10-03	1.11.660.2325.3119.4003.8556	Bulgaria	Europe	Eastern Europe
SRR6900742	2016-09-20	1.11.82.1708.2484.3104.5707	Bulgaria	Europe	Eastern Europe
SRR7828419	2018-07-23	1.2.3.18.175.175.10499	Bulgaria	Europe	Eastern Europe
SRR7841512	2018-07-18	1.2.3.18.175.175.3397	Bulgaria	Europe	Eastern Europe
SRR6900956	2017-08-01	1.2.3.18.175.175.7972	Bulgaria	Europe	Eastern Europe
SRR6920506	2017-09-07	1.2.3.18.175.175.8318	Bulgaria	Europe	Eastern Europe
SRR6900134	2017-09-13	1.2.3.18.175.175.8362	Bulgaria	Europe	Eastern Europe
SRR5220307	2015-09-18	1.2.3.18.3648.4903.10568	Bulgaria	Europe	Eastern Europe
SRR6919312	2017-08-31	1.2.3.18.3648.4903.10613	Bulgaria	Europe	Eastern Europe
SRR6919277	2017-07-04	1.2.3.18.3648.4903.10622	Bulgaria	Europe	Eastern Europe
SRR7527861	2017-06-23	1.2.3.18.3648.4903.10644	Bulgaria	Europe	Eastern Europe
SRR8711775	2015-09-11	1.5.69.1112.1843.2187.3438	Bulgaria	Europe	Eastern Europe
SRR6900850	2017-10-02	1.5.69.1112.3214.4170.8574	Bulgaria	Europe	Eastern Europe
SRR5194331	2016-08-31	1.5.69.531.2315.2884.5237	Bulgaria	Europe	Eastern Europe
SRR5216193	2016-09-26	1.5.69.531.2496.3123.5815	Bulgaria	Europe	Eastern Europe
SRR8514641	2018-02-12	1.1.2.80.100.100.7880	Cape verde	Africa	Sub-Saharan Africa
SRR6897875	2017-10-13	1.1.2.80.100.100.8659	Cape verde	Africa	Sub-Saharan Africa
SRR3284844	2015-10-28	1.2.3.151.1800.2130.3920	Cape verde	Africa	Sub-Saharan Africa
SRR8648228	2019-02-12	1.2.3.18.180.180.10985	Cape verde	Africa	Sub-Saharan Africa
SRR8585162	2019-01-29	1.2.3.18.180.180.12684	Cape verde	Africa	Sub-Saharan Africa
SRR8691506	2019-02-18	1.2.3.18.180.180.12767	Cape verde	Africa	Sub-Saharan Africa
SRR8239903	2018-11-12	1.2.3.18.3256.5644.12128	Cape verde	Africa	Sub-Saharan Africa
SRR7351348	2015-11-19	1.2.3.18.365.2452.4069	Cape verde	Africa	Sub-Saharan Africa
SRR8503738	2018-04-04	1.2.3.18.365.2876.9775	Cape verde	Africa	Sub-Saharan Africa
SRR5193507	2016-08-02	1.21.152.270.2270.2814.5072	Cape verde	Africa	Sub-Saharan Africa
SRR6901197	2016-08-02	1.21.152.270.2270.2814.5101	Cape verde	Africa	Sub-Saharan Africa
SRR1969985	2014-11-11	1.21.152.270.270.270.1265	Cape verde	Africa	Sub-Saharan Africa
SRR1959217	2014-12-02	1.21.152.270.270.270.2518	Cape verde	Africa	Sub-Saharan Africa
SRR1963361	2015-01-06	1.21.152.270.270.270.904	Cape verde	Africa	Sub-Saharan Africa
SRR3585356	2015-09-01	1.21.260.1114.1845.2190.3444	Cape verde	Africa	Sub-Saharan Africa
SRR7187213	2015-09-04	1.21.260.1114.1845.2190.3555	Cape verde	Africa	Sub-Saharan Africa
SRR5220622	2016-10-18	1.21.496.1858.2552.3201.6037	Cape verde	Africa	Sub-Saharan Africa
SRR5215795	2016-10-17	1.21.496.1858.2552.3201.6051	Cape verde	Africa	Sub-Saharan Africa
SRR5194243	2016-10-20	1.21.496.1858.2552.3201.6068	Cape verde	Africa	Sub-Saharan Africa
SRR7297982	2015-10-26	1.1.2.1181.2005.2408.3969	China	Asia	Eastern Asia
SRR5220108	2015-11-04	1.1.2.1183.2008.2414.3978	China	Asia	Eastern Asia
SRR6920165	2017-09-08	1.1.2.174.3169.4092.8348	China	Asia	Eastern Asia
SRR7962254	2018-09-17	1.1.2.174.3252.4262.11762	China	Asia	Eastern Asia
SRR7884713	2018-07-17	1.1.2.174.3631.4861.10458	China	Asia	Eastern Asia
SRR5216455	2016-09-06	1.1.2.206.2441.3043.5516	China	Asia	Eastern Asia
SRR1969341	2014-11-03	1.1.2.214.214.214.214	China	Asia	Eastern Asia
SRR1970088	2014-11-12	1.1.2.242.242.242.1680	China	Asia	Eastern Asia
SRR7359045	2018-05-10	1.1.2.242.3555.4719.9941	China	Asia	Eastern Asia
SRR8269077	2018-11-13	1.1.2.2656.4044.5703.12428	China	Asia	Eastern Asia
SRR1961769	2014-11-18	1.1.2.291.1436.1655.2275	China	Asia	Eastern Asia
SRR1968511	2014-06-25	1.1.2.47.47.47.47	China	Asia	Eastern Asia
SRR3285284	2015-06-18	1.1.2.7.1724.2015.2977	China	Asia	Eastern Asia
SRR6900695	2017-07-04	1.1.2.7.3085.3931.7722	China	Asia	Eastern Asia
SRR6922083	2017-09-12	1.1.2.7.3187.4120.8424	China	Asia	Eastern Asia
SRR6918629	2017-10-05	1.1.2.7.3216.4176.8587	China	Asia	Eastern Asia
SRR6900554	2017-11-14	1.1.2.7.3216.4260.8873	China	Asia	Eastern Asia
SRR8503650	2018-05-03	1.1.2.7.3550.4710.9909	China	Asia	Eastern Asia
SRR8499260	2018-05-16	1.1.2.7.3550.4710.9954	China	Asia	Eastern Asia
SRR7879587	2018-08-07	1.1.2.7.3550.5315.11345	China	Asia	Eastern Asia
SRR8515755	2018-05-10	1.1.2.7.3563.4730.9971	China	Asia	Eastern Asia
SRR8299424	2018-08-24	1.1.2.7.3860.5380.11512	China	Asia	Eastern Asia
SRR5193096	2016-04-29	1.1.2.7.426.2654.4622	China	Asia	Eastern Asia
SRR5583845	2017-02-27	1.1.2.7.426.3647.7005	China	Asia	Eastern Asia
SRR6918552	2017-07-18	1.1.2.7.426.4012.8074	China	Asia	Eastern Asia
SRR1970131	2014-07-25	1.1.52.75.75.75.75	China	Asia	Eastern Asia
SRR5193472	2016-12-05	1.21.92.248.2622.3310.6380	China	Asia	Eastern Asia
SRR5220952	2015-06-02	4.41.232.1043.1697.1969.2876	China	Asia	Eastern Asia
SRR1969195	2014-05-07	1.1.2.15.1015.1140.1518	Cuba	Americas	Latin America and the Caribbean
SRR1970066	2015-03-13	1.1.2.15.1015.1140.2431	Cuba	Americas	Latin America and the Caribbean
SRR3049703	2014-04-30	1.1.2.15.1015.1140.2595	Cuba	Americas	Latin America and the Caribbean
SRR3049597	2014-04-28	1.1.2.15.1015.1140.2612	Cuba	Americas	Latin America and the Caribbean
SRR1963081	2014-11-13	1.1.2.15.1217.1387.1883	Cuba	Americas	Latin America and the Caribbean
SRR1966663	2014-05-12	1.1.2.15.15.15.15	Cuba	Americas	Latin America and the Caribbean
SRR7884512	2018-09-05	1.1.2.15.15.3655.11659	Cuba	Americas	Latin America and the Caribbean
SRR8117007	2018-10-08	1.1.2.15.15.3655.12114	Cuba	Americas	Latin America and the Caribbean
SRR9287750	2019-04-12	1.1.2.15.15.3655.12974	Cuba	Americas	Latin America and the Caribbean
SRR6922785	2017-09-12	1.1.2.15.15.3655.8364	Cuba	Americas	Latin America and the Caribbean
SRR6922486	2017-09-28	1.1.2.15.15.3655.8596	Cuba	Americas	Latin America and the Caribbean
SRR8509074	2018-03-12	1.1.2.15.15.3655.9704	Cuba	Americas	Latin America and the Caribbean
SRR7285867	2015-11-30	1.1.2.15.2056.2487.4165	Cuba	Americas	Latin America and the Caribbean
SRR5216173	2016-03-03	1.1.2.15.2056.2487.4479	Cuba	Americas	Latin America and the Caribbean
SRR5193249	2016-04-27	1.1.2.15.2056.2487.4610	Cuba	Americas	Latin America and the Caribbean
SRR6900474	2017-01-24	1.1.2.15.2056.2487.6871	Cuba	Americas	Latin America and the Caribbean
SRR6918875	2017-01-18	1.1.2.15.2056.2487.6891	Cuba	Americas	Latin America and the Caribbean
SRR6921913	2017-01-18	1.1.2.15.2056.2487.6900	Cuba	Americas	Latin America and the Caribbean
SRR5220227	2016-12-20	1.1.2.15.2056.3343.6495	Cuba	Americas	Latin America and the Caribbean
SRR5194271	2016-01-13	1.1.2.15.2089.2535.4313	Cuba	Americas	Latin America and the Caribbean
SRR5215881	2016-02-09	1.1.2.15.2118.2577.4405	Cuba	Americas	Latin America and the Caribbean
SRR5193281	2016-07-18	1.1.2.15.2252.2789.4996	Cuba	Americas	Latin America and the Caribbean
SRR6922710	2017-06-14	1.1.2.15.2274.2823.7550	Cuba	Americas	Latin America and the Caribbean
SRR6898312	2016-08-10	1.1.2.15.2278.2827.5109	Cuba	Americas	Latin America and the Caribbean
SRR5193869	2016-09-14	1.1.2.15.2460.3066.5598	Cuba	Americas	Latin America and the Caribbean
SRR6919842	2016-10-10	1.1.2.15.2517.3152.5902	Cuba	Americas	Latin America and the Caribbean
SRR7506997	2018-06-25	1.1.2.15.2834.3578.10266	Cuba	Americas	Latin America and the Caribbean
SRR6918339	2017-01-11	1.1.2.15.2834.3578.6852	Cuba	Americas	Latin America and the Caribbean
SRR5585374	2017-02-07	1.1.2.15.2850.3603.6933	Cuba	Americas	Latin America and the Caribbean
SRR7298387	2018-01-25	1.1.2.15.2850.3603.9340	Cuba	Americas	Latin America and the Caribbean
SRR7439464	2018-03-21	1.1.2.15.2850.4634.9722	Cuba	Americas	Latin America and the Caribbean
SRR5633354	2017-03-14	1.1.2.15.2929.3683.7077	Cuba	Americas	Latin America and the Caribbean
SRR6919160	2017-03-20	1.1.2.15.2929.3683.7099	Cuba	Americas	Latin America and the Caribbean
SRR6920459	2017-06-19	1.1.2.15.3069.3898.7617	Cuba	Americas	Latin America and the Caribbean
SRR7842558	2018-07-23	1.1.2.15.3111.3985.10500	Cuba	Americas	Latin America and the Caribbean
SRR6919512	2017-09-22	1.1.2.15.3111.4133.8467	Cuba	Americas	Latin America and the Caribbean
SRR6922496	2017-10-05	1.1.2.15.3218.4179.8595	Cuba	Americas	Latin America and the Caribbean
SRR1965454	2014-09-16	1.1.2.15.361.1317.1778	Cuba	Americas	Latin America and the Caribbean
SRR7298362	2018-05-30	1.1.2.15.361.1950.10060	Cuba	Americas	Latin America and the Caribbean
SRR7998237	2018-06-20	1.1.2.15.361.1950.10160	Cuba	Americas	Latin America and the Caribbean
SRR7842568	2018-08-22	1.1.2.15.361.1950.11481	Cuba	Americas	Latin America and the Caribbean
SRR7841552	2018-08-30	1.1.2.15.361.1950.11571	Cuba	Americas	Latin America and the Caribbean
SRR8293824	2018-09-06	1.1.2.15.361.1950.11642	Cuba	Americas	Latin America and the Caribbean
SRR7885130	2018-09-10	1.1.2.15.361.1950.11658	Cuba	Americas	Latin America and the Caribbean
SRR7890428	2018-09-05	1.1.2.15.361.1950.11673	Cuba	Americas	Latin America and the Caribbean
SRR8427182	2018-12-18	1.1.2.15.361.1950.12578	Cuba	Americas	Latin America and the Caribbean
SRR8731039	2015-05-12	1.1.2.15.361.1950.2803	Cuba	Americas	Latin America and the Caribbean
SRR6900953	2017-05-18	1.1.2.15.361.1950.3179	Cuba	Americas	Latin America and the Caribbean
SRR7506784	2015-09-11	1.1.2.15.361.1950.3456	Cuba	Americas	Latin America and the Caribbean
SRR5194299	2016-05-11	1.1.2.15.361.1950.4656	Cuba	Americas	Latin America and the Caribbean
SRR5193167	2016-06-15	1.1.2.15.361.1950.4836	Cuba	Americas	Latin America and the Caribbean
SRR6900454	2016-06-22	1.1.2.15.361.1950.4867	Cuba	Americas	Latin America and the Caribbean
SRR5193749	2016-07-21	1.1.2.15.361.1950.5015	Cuba	Americas	Latin America and the Caribbean
SRR5193061	2016-11-15	1.1.2.15.361.1950.6275	Cuba	Americas	Latin America and the Caribbean
SRR6922611	2016-11-28	1.1.2.15.361.1950.6320	Cuba	Americas	Latin America and the Caribbean
SRR6900542	2016-11-29	1.1.2.15.361.1950.6327	Cuba	Americas	Latin America and the Caribbean
SRR7349226	2016-12-13	1.1.2.15.361.1950.6439	Cuba	Americas	Latin America and the Caribbean
SRR5585296	2017-01-05	1.1.2.15.361.1950.6832	Cuba	Americas	Latin America and the Caribbean
SRR6918566	2017-01-26	1.1.2.15.361.1950.6901	Cuba	Americas	Latin America and the Caribbean
SRR6922672	2017-02-07	1.1.2.15.361.1950.6926	Cuba	Americas	Latin America and the Caribbean
SRR6919260	2017-02-23	1.1.2.15.361.1950.7011	Cuba	Americas	Latin America and the Caribbean
SRR6897976	2017-03-06	1.1.2.15.361.1950.7045	Cuba	Americas	Latin America and the Caribbean
SRR5632027	2017-03-08	1.1.2.15.361.1950.7052	Cuba	Americas	Latin America and the Caribbean
SRR6922122	2017-04-04	1.1.2.15.361.1950.7133	Cuba	Americas	Latin America and the Caribbean
SRR6922016	2017-04-05	1.1.2.15.361.1950.7144	Cuba	Americas	Latin America and the Caribbean
SRR5584636	2017-04-10	1.1.2.15.361.1950.7158	Cuba	Americas	Latin America and the Caribbean
SRR5584554	2017-04-12	1.1.2.15.361.1950.7179	Cuba	Americas	Latin America and the Caribbean
SRR5585015	2017-05-04	1.1.2.15.361.1950.7238	Cuba	Americas	Latin America and the Caribbean
SRR6922487	2017-05-04	1.1.2.15.361.1950.7256	Cuba	Americas	Latin America and the Caribbean
SRR6922671	2017-05-19	1.1.2.15.361.1950.7319	Cuba	Americas	Latin America and the Caribbean
SRR6919030	2017-07-04	1.1.2.15.361.1950.7718	Cuba	Americas	Latin America and the Caribbean
SRR6900197	2017-07-05	1.1.2.15.361.1950.7720	Cuba	Americas	Latin America and the Caribbean
SRR6896965	2017-07-12	1.1.2.15.361.1950.7777	Cuba	Americas	Latin America and the Caribbean
SRR6920148	2017-08-02	1.1.2.15.361.1950.7978	Cuba	Americas	Latin America and the Caribbean
SRR6900373	2017-09-11	1.1.2.15.361.1950.8293	Cuba	Americas	Latin America and the Caribbean
SRR6898010	2017-09-12	1.1.2.15.361.1950.8350	Cuba	Americas	Latin America and the Caribbean
SRR6919920	2017-09-12	1.1.2.15.361.1950.8361	Cuba	Americas	Latin America and the Caribbean
SRR6898456	2017-09-21	1.1.2.15.361.1950.8466	Cuba	Americas	Latin America and the Caribbean
SRR8490746	2018-07-23	1.1.2.15.361.1950.8598	Cuba	Americas	Latin America and the Caribbean
SRR6897829	2017-12-07	1.1.2.15.361.1950.9001	Cuba	Americas	Latin America and the Caribbean
SRR7850599	2018-07-12	1.1.2.15.361.1950.9334	Cuba	Americas	Latin America and the Caribbean
SRR8508660	2018-02-26	1.1.2.15.361.1950.9558	Cuba	Americas	Latin America and the Caribbean
SRR8509031	2018-02-27	1.1.2.15.361.1950.9571	Cuba	Americas	Latin America and the Caribbean
SRR7188019	2018-04-06	1.1.2.15.361.1950.9769	Cuba	Americas	Latin America and the Caribbean
SRR7223157	2018-04-19	1.1.2.15.361.1950.9841	Cuba	Americas	Latin America and the Caribbean
SRR7527873	2018-04-24	1.1.2.15.361.1950.9865	Cuba	Americas	Latin America and the Caribbean
SRR8524718	2018-04-26	1.1.2.15.361.1950.9879	Cuba	Americas	Latin America and the Caribbean
SRR7343911	2018-05-02	1.1.2.15.361.1950.9899	Cuba	Americas	Latin America and the Caribbean
SRR7209521	2018-05-11	1.1.2.15.361.1950.9942	Cuba	Americas	Latin America and the Caribbean
SRR5216159	2016-02-08	1.1.2.15.361.2574.4401	Cuba	Americas	Latin America and the Caribbean
SRR6900108	2017-04-12	1.1.2.15.361.2574.7184	Cuba	Americas	Latin America and the Caribbean
SRR6901154	2016-02-23	1.1.2.15.361.2592.4466	Cuba	Americas	Latin America and the Caribbean
SRR6900082	2016-09-05	1.1.2.15.361.2592.5495	Cuba	Americas	Latin America and the Caribbean
SRR5193610	2016-10-26	1.1.2.15.361.2592.6083	Cuba	Americas	Latin America and the Caribbean
SRR6922516	2016-03-11	1.1.2.15.361.2613.4519	Cuba	Americas	Latin America and the Caribbean
SRR5216103	2016-04-19	1.1.2.15.361.2648.4603	Cuba	Americas	Latin America and the Caribbean
SRR5216479	2016-06-02	1.1.2.15.361.2705.4758	Cuba	Americas	Latin America and the Caribbean
SRR5216603	2016-09-02	1.1.2.15.361.3055.5553	Cuba	Americas	Latin America and the Caribbean
SRR6898102	2016-09-15	1.1.2.15.361.3095.5688	Cuba	Americas	Latin America and the Caribbean
SRR5193585	2016-10-04	1.1.2.15.361.3146.5883	Cuba	Americas	Latin America and the Caribbean
SRR8364471	2018-08-23	1.1.2.15.361.3202.11506	Cuba	Americas	Latin America and the Caribbean
SRR5193753	2016-10-19	1.1.2.15.361.3202.6038	Cuba	Americas	Latin America and the Caribbean
SRR6924057	2017-01-30	1.1.2.15.361.3202.6903	Cuba	Americas	Latin America and the Caribbean
SRR5633213	2017-03-23	1.1.2.15.361.3692.7103	Cuba	Americas	Latin America and the Caribbean
SRR5632815	2017-04-21	1.1.2.15.361.3716.7175	Cuba	Americas	Latin America and the Caribbean
SRR7523078	2018-03-07	1.1.2.15.361.4254.9696	Cuba	Americas	Latin America and the Caribbean
SRR6898378	2017-11-15	1.1.2.15.361.4261.8875	Cuba	Americas	Latin America and the Caribbean
SRR7368935	2018-01-15	1.1.2.15.361.4411.9230	Cuba	Americas	Latin America and the Caribbean
SRR8568766	2019-01-31	1.1.2.15.361.4646.12705	Cuba	Americas	Latin America and the Caribbean
SRR8492344	2018-06-12	1.1.2.15.361.4673.9803	Cuba	Americas	Latin America and the Caribbean
SRR8503886	2018-04-27	1.1.2.15.361.4702.9872	Cuba	Americas	Latin America and the Caribbean
SRR8509189	2018-05-17	1.1.2.15.361.4729.9965	Cuba	Americas	Latin America and the Caribbean
SRR9287421	2019-04-12	1.1.2.15.361.4868.12973	Cuba	Americas	Latin America and the Caribbean
SRR7842654	2018-07-25	1.1.2.15.361.4882.10524	Cuba	Americas	Latin America and the Caribbean
SRR8201844	2018-11-02	1.1.2.15.361.4882.12370	Cuba	Americas	Latin America and the Caribbean
SRR8514513	2019-01-15	1.1.2.15.361.4882.12659	Cuba	Americas	Latin America and the Caribbean
SRR7828238	2018-08-21	1.1.2.15.361.5354.11435	Cuba	Americas	Latin America and the Caribbean
SRR7903106	2018-08-29	1.1.2.15.361.5389.11535	Cuba	Americas	Latin America and the Caribbean
SRR8297297	2018-08-30	1.1.2.15.361.5395.11563	Cuba	Americas	Latin America and the Caribbean
SRR7911491	2018-09-10	1.1.2.15.361.5427.11671	Cuba	Americas	Latin America and the Caribbean
SRR7911437	2018-09-10	1.1.2.15.361.5437.11716	Cuba	Americas	Latin America and the Caribbean
SRR8084289	2018-10-05	1.1.2.15.361.5639.12109	Cuba	Americas	Latin America and the Caribbean
SRR8585128	2019-02-05	1.1.2.15.361.5809.12716	Cuba	Americas	Latin America and the Caribbean
SRR8703575	2019-02-19	1.1.2.15.361.5827.12761	Cuba	Americas	Latin America and the Caribbean
SRR8724658	2019-02-26	1.1.2.15.361.5843.12800	Cuba	Americas	Latin America and the Caribbean
SRR7458813	2015-06-03	1.1.2.15.383.1245.2883	Cuba	Americas	Latin America and the Caribbean
SRR5220517	2015-09-11	1.1.2.15.383.1245.4294	Cuba	Americas	Latin America and the Caribbean
SRR6919819	2017-11-28	1.1.2.15.383.1245.8847	Cuba	Americas	Latin America and the Caribbean
SRR6924069	2017-06-15	1.1.2.15.383.3918.7683	Cuba	Americas	Latin America and the Caribbean
SRR6900152	2017-08-22	1.1.2.15.383.4049.8169	Cuba	Americas	Latin America and the Caribbean
SRR7842674	2018-09-04	1.1.2.15.3870.5409.11611	Cuba	Americas	Latin America and the Caribbean
SRR8272603	2018-09-10	1.1.2.15.3880.5426.11666	Cuba	Americas	Latin America and the Caribbean
SRR8293602	2018-11-28	1.1.2.15.3880.5723.12493	Cuba	Americas	Latin America and the Caribbean
SRR1968811	2014-05-01	1.1.2.15.428.438.583	Cuba	Americas	Latin America and the Caribbean
SRR1962045	2014-11-13	1.1.2.15.428.709.2062	Cuba	Americas	Latin America and the Caribbean
SRR5220965	2015-06-25	1.1.2.15.729.2010.2959	Cuba	Americas	Latin America and the Caribbean
SRR5193683	2016-07-19	1.1.2.15.729.2010.5001	Cuba	Americas	Latin America and the Caribbean
SRR5193830	2016-07-27	1.1.2.15.729.2010.5049	Cuba	Americas	Latin America and the Caribbean
SRR5193950	2016-12-29	1.1.2.15.729.2010.6790	Cuba	Americas	Latin America and the Caribbean
SRR7903100	2015-12-23	1.1.2.15.729.2508.4236	Cuba	Americas	Latin America and the Caribbean
SRR1963097	2014-12-02	1.1.2.15.729.945.1213	Cuba	Americas	Latin America and the Caribbean
SRR6897790	2017-05-31	1.1.333.103.103.548.5035	Cuba	Americas	Latin America and the Caribbean
SRR3286681	2015-05-05	1.5.79.1029.1675.1939.2774	Cuba	Americas	Latin America and the Caribbean
SRR7172561	2015-11-25	1.1.2.1326.1918.2290.4088	Cyprus	Asia	Western Asia
SRR5193792	2016-09-01	1.1.2.1326.544.571.5369	Cyprus	Asia	Western Asia
SRR7842623	2018-08-30	1.1.2.1326.800.2147.11576	Cyprus	Asia	Western Asia
SRR8201827	2018-11-06	1.1.2.1326.800.2147.12382	Cyprus	Asia	Western Asia
SRR7350649	2018-04-18	1.1.2.1326.800.2147.9832	Cyprus	Asia	Western Asia
SRR5193714	2016-10-18	1.1.2.1326.800.3205.6044	Cyprus	Asia	Western Asia
SRR7297901	2018-01-05	1.1.2.1326.800.3205.9204	Cyprus	Asia	Western Asia
SRR7892273	2018-05-10	1.1.2.1326.800.3205.9935	Cyprus	Asia	Western Asia
SRR5216509	2015-12-02	1.1.2.1712.475.492.4084	Cyprus	Asia	Western Asia
SRR8281176	2018-11-21	1.1.2.237.3136.4038.11530	Cyprus	Asia	Western Asia
SRR8116959	2018-10-16	1.1.2.237.3136.4038.12192	Cyprus	Asia	Western Asia
SRR8182955	2018-10-23	1.1.2.2533.3617.4833.12299	Cyprus	Asia	Western Asia
SRR6898108	2017-08-17	1.1.2.28.195.195.8125	Cyprus	Asia	Western Asia
SRR8281265	2018-10-17	1.1.2.28.43.1319.12219	Cyprus	Asia	Western Asia
SRR5220283	2016-10-03	1.1.2.314.476.3137.5843	Cyprus	Asia	Western Asia
SRR5215526	2015-08-25	1.11.48.1103.1829.2168.3382	Cyprus	Asia	Western Asia
SRR5220909	2015-10-22	1.2.3.151.151.783.2809	Cyprus	Asia	Western Asia
SRR5193235	2016-10-10	1.2.3.151.362.363.5918	Cyprus	Asia	Western Asia
SRR7523809	2018-06-19	1.2.3.18.175.175.10143	Cyprus	Asia	Western Asia
SRR6921965	2016-11-01	1.2.3.18.175.175.3397	Cyprus	Asia	Western Asia
SRR8293559	2018-11-27	1.2.3.18.1895.2261.12482	Cyprus	Asia	Western Asia
SRR5193415	2016-07-28	1.2.3.18.62.62.5044	Cyprus	Asia	Western Asia
SRR5194027	2016-11-29	59.106.504.1891.2617.3299.6356	Cyprus	Asia	Western Asia
SRR7873970	2018-08-22	59.106.504.2552.3858.5371.11485	Cyprus	Asia	Western Asia
SRR1966691	2014-08-04	1.1.2.95.95.95.95	Czech republic	Europe	Eastern Europe
SRR1967811	2015-03-05	1.2.3.18.1005.1128.1502	Czech republic	Europe	Eastern Europe
SRR6920125	2016-09-21	1.2.3.18.180.180.11135	Czech republic	Europe	Eastern Europe
SRR7873898	2018-09-07	1.2.3.18.180.180.11644	Czech republic	Europe	Eastern Europe
SRR6919318	2017-09-12	1.2.3.18.180.5089.10806	Czech republic	Europe	Eastern Europe
SRR1966789	2015-02-06	1.2.3.18.180.5185.11022	Czech republic	Europe	Eastern Europe
SRR5193440	2016-09-14	1.2.3.18.2226.2749.5593	Czech republic	Europe	Eastern Europe
SRR7538806	2018-07-05	1.2.3.18.3616.4832.10337	Czech republic	Europe	Eastern Europe
SRR6899356	2017-12-18	1.2.3.18.377.4326.9039	Czech republic	Europe	Eastern Europe
SRR1965484	2014-09-04	1.2.3.18.38.38.458	Czech republic	Europe	Eastern Europe
SRR6919090	2017-09-25	1.1.2.61.3197.4141.8483	Dominica	Americas	Latin America and the Caribbean
SRR6899429	2016-04-26	1.1.2.61.61.2651.4616	Dominica	Americas	Latin America and the Caribbean
SRR6919834	2017-08-07	1.1.2.61.61.3974.7910	Dominica	Americas	Latin America and the Caribbean
SRR6919478	2017-10-23	1.1.2.61.61.4202.8722	Dominica	Americas	Latin America and the Caribbean
SRR8492331	2018-06-14	1.1.2.61.61.4693.10126	Dominica	Americas	Latin America and the Caribbean
SRR5193404	2016-04-08	1.1.2.61.61.561.4561	Dominica	Americas	Latin America and the Caribbean
SRR5220052	2017-01-10	1.1.2.61.61.561.4987	Dominica	Americas	Latin America and the Caribbean
SRR5193594	2017-01-06	1.1.2.61.61.561.6833	Dominica	Americas	Latin America and the Caribbean
SRR6900482	2017-04-20	1.1.2.61.61.561.7188	Dominica	Americas	Latin America and the Caribbean
SRR6900654	2017-10-25	1.1.2.61.61.561.8739	Dominica	Americas	Latin America and the Caribbean
SRR6922712	2017-03-10	1.1.2.61.61.61.7060	Dominica	Americas	Latin America and the Caribbean
SRR7417201	2018-02-09	1.1.2.61.61.61.9376	Dominica	Americas	Latin America and the Caribbean
SRR7343933	2018-02-09	1.1.2.61.61.61.9455	Dominica	Americas	Latin America and the Caribbean
SRR3049056	2014-06-10	1.1.2.1326.544.571.2083	Dominican republic	Americas	Latin America and the Caribbean
SRR6924131	2017-03-23	1.1.2.61.2935.3693.7105	Dominican republic	Americas	Latin America and the Caribbean
SRR8740776	2015-06-18	1.1.2.61.61.2011.2970	Dominican republic	Americas	Latin America and the Caribbean
SRR6919481	2016-05-05	1.1.2.61.61.2651.4616	Dominican republic	Americas	Latin America and the Caribbean
SRR5220528	2016-05-23	1.1.2.61.61.2651.4697	Dominican republic	Americas	Latin America and the Caribbean
SRR6919314	2017-09-04	1.1.2.61.61.4062.8263	Dominican republic	Americas	Latin America and the Caribbean
SRR6922519	2017-10-17	1.1.2.61.61.4062.8667	Dominican republic	Americas	Latin America and the Caribbean
SRR6901170	2017-11-07	1.1.2.61.61.4062.8810	Dominican republic	Americas	Latin America and the Caribbean
SRR6896967	2017-11-07	1.1.2.61.61.4062.8816	Dominican republic	Americas	Latin America and the Caribbean
SRR7351490	2018-02-12	1.1.2.61.61.4062.9457	Dominican republic	Americas	Latin America and the Caribbean
SRR6898884	2017-10-18	1.1.2.61.61.4202.8694	Dominican republic	Americas	Latin America and the Caribbean
SRR6920002	2017-10-31	1.1.2.61.61.4202.8722	Dominican republic	Americas	Latin America and the Caribbean
SRR6920150	2017-11-01	1.1.2.61.61.4202.8777	Dominican republic	Americas	Latin America and the Caribbean
SRR6924052	2017-11-23	1.1.2.61.61.4265.8890	Dominican republic	Americas	Latin America and the Caribbean
SRR6898439	2017-12-04	1.1.2.61.61.4265.8944	Dominican republic	Americas	Latin America and the Caribbean
SRR6898417	2017-11-29	1.1.2.61.61.4287.8943	Dominican republic	Americas	Latin America and the Caribbean
SRR7292896	2018-01-10	1.1.2.61.61.4398.9192	Dominican republic	Americas	Latin America and the Caribbean
SRR7439596	2018-06-01	1.1.2.61.61.4676.10059	Dominican republic	Americas	Latin America and the Caribbean
SRR7842415	2018-07-17	1.1.2.61.61.4676.10452	Dominican republic	Americas	Latin America and the Caribbean
SRR8499082	2018-06-12	1.1.2.61.61.4693.10106	Dominican republic	Americas	Latin America and the Caribbean
SRR7450823	2018-06-20	1.1.2.61.61.4693.10159	Dominican republic	Americas	Latin America and the Caribbean
SRR7850626	2018-08-08	1.1.2.61.61.4693.11366	Dominican republic	Americas	Latin America and the Caribbean
SRR8503968	2018-04-24	1.1.2.61.61.4693.9854	Dominican republic	Americas	Latin America and the Caribbean
SRR7842634	2018-08-02	1.1.2.61.61.4827.11353	Dominican republic	Americas	Latin America and the Caribbean
SRR8142752	2018-10-18	1.1.2.61.61.4827.12221	Dominican republic	Americas	Latin America and the Caribbean
SRR8380061	2018-07-23	1.1.2.61.61.4849.10425	Dominican republic	Americas	Latin America and the Caribbean
SRR7962209	2018-09-18	1.1.2.61.61.5384.11795	Dominican republic	Americas	Latin America and the Caribbean
SRR8325500	2018-10-02	1.1.2.61.61.5384.12065	Dominican republic	Americas	Latin America and the Caribbean
SRR7469074	2018-06-21	1.1.2.61.61.561.10188	Dominican republic	Americas	Latin America and the Caribbean
SRR7885126	2018-07-10	1.1.2.61.61.561.10402	Dominican republic	Americas	Latin America and the Caribbean
SRR8350280	2018-08-21	1.1.2.61.61.561.11444	Dominican republic	Americas	Latin America and the Caribbean
SRR8204753	2018-10-18	1.1.2.61.61.561.12222	Dominican republic	Americas	Latin America and the Caribbean
SRR3049358	2014-12-22	1.1.2.61.61.561.1567	Dominican republic	Americas	Latin America and the Caribbean
SRR8730397	2015-06-17	1.1.2.61.61.561.2839	Dominican republic	Americas	Latin America and the Caribbean
SRR7284514	2015-06-04	1.1.2.61.61.561.2881	Dominican republic	Americas	Latin America and the Caribbean
SRR5216581	2015-06-22	1.1.2.61.61.561.3008	Dominican republic	Americas	Latin America and the Caribbean
SRR5215841	2015-07-02	1.1.2.61.61.561.3048	Dominican republic	Americas	Latin America and the Caribbean
SRR5194143	2015-07-09	1.1.2.61.61.561.3092	Dominican republic	Americas	Latin America and the Caribbean
SRR3284835	2015-08-11	1.1.2.61.61.561.3302	Dominican republic	Americas	Latin America and the Caribbean
SRR7286867	2015-09-09	1.1.2.61.61.561.3448	Dominican republic	Americas	Latin America and the Caribbean
SRR5220877	2015-10-09	1.1.2.61.61.561.3740	Dominican republic	Americas	Latin America and the Caribbean
SRR7443897	2015-10-14	1.1.2.61.61.561.3884	Dominican republic	Americas	Latin America and the Caribbean
SRR7417302	2015-11-27	1.1.2.61.61.561.4105	Dominican republic	Americas	Latin America and the Caribbean
SRR8704751	2015-12-04	1.1.2.61.61.561.4172	Dominican republic	Americas	Latin America and the Caribbean
SRR5193398	2015-12-15	1.1.2.61.61.561.4214	Dominican republic	Americas	Latin America and the Caribbean
SRR5216237	2016-02-02	1.1.2.61.61.561.4393	Dominican republic	Americas	Latin America and the Caribbean
SRR5216577	2016-09-16	1.1.2.61.61.561.4856	Dominican republic	Americas	Latin America and the Caribbean
SRR6918334	2016-10-21	1.1.2.61.61.561.6057	Dominican republic	Americas	Latin America and the Caribbean
SRR5194328	2016-10-24	1.1.2.61.61.561.6118	Dominican republic	Americas	Latin America and the Caribbean
SRR6922492	2017-01-30	1.1.2.61.61.561.6905	Dominican republic	Americas	Latin America and the Caribbean
SRR6919178	2017-10-04	1.1.2.61.61.561.7188	Dominican republic	Americas	Latin America and the Caribbean
SRR5633116	2017-04-25	1.1.2.61.61.561.7209	Dominican republic	Americas	Latin America and the Caribbean
SRR6918586	2017-05-12	1.1.2.61.61.561.7279	Dominican republic	Americas	Latin America and the Caribbean
SRR6922651	2017-06-19	1.1.2.61.61.561.7628	Dominican republic	Americas	Latin America and the Caribbean
SRR6900192	2017-10-31	1.1.2.61.61.561.7714	Dominican republic	Americas	Latin America and the Caribbean
SRR8166212	2018-10-22	1.1.2.61.61.5674.12262	Dominican republic	Americas	Latin America and the Caribbean
SRR8258163	2018-11-13	1.1.2.61.61.5708.12440	Dominican republic	Americas	Latin America and the Caribbean
SRR8492423	2018-06-18	1.1.2.61.61.61.10190	Dominican republic	Americas	Latin America and the Caribbean
SRR7867159	2018-07-13	1.1.2.61.61.61.10424	Dominican republic	Americas	Latin America and the Caribbean
SRR7873873	2018-07-17	1.1.2.61.61.61.10501	Dominican republic	Americas	Latin America and the Caribbean
SRR7828267	2018-08-16	1.1.2.61.61.61.11432	Dominican republic	Americas	Latin America and the Caribbean
SRR8258143	2018-11-13	1.1.2.61.61.61.12424	Dominican republic	Americas	Latin America and the Caribbean
SRR3284817	2015-06-10	1.1.2.61.61.61.2919	Dominican republic	Americas	Latin America and the Caribbean
SRR5193062	2015-09-30	1.1.2.61.61.61.3663	Dominican republic	Americas	Latin America and the Caribbean
SRR7465079	2015-09-29	1.1.2.61.61.61.3680	Dominican republic	Americas	Latin America and the Caribbean
SRR5216056	2015-12-02	1.1.2.61.61.61.4111	Dominican republic	Americas	Latin America and the Caribbean
SRR5193239	2015-12-30	1.1.2.61.61.61.4242	Dominican republic	Americas	Latin America and the Caribbean
SRR8701072	2016-02-08	1.1.2.61.61.61.4410	Dominican republic	Americas	Latin America and the Caribbean
SRR6901174	2016-03-22	1.1.2.61.61.61.4532	Dominican republic	Americas	Latin America and the Caribbean
SRR5194246	2016-03-30	1.1.2.61.61.61.4539	Dominican republic	Americas	Latin America and the Caribbean
SRR5216551	2016-04-07	1.1.2.61.61.61.4567	Dominican republic	Americas	Latin America and the Caribbean
SRR1969189	2014-07-08	1.1.2.61.61.61.61	Dominican republic	Americas	Latin America and the Caribbean
SRR6896814	2017-07-05	1.1.2.61.61.61.7060	Dominican republic	Americas	Latin America and the Caribbean
SRR5583245	2017-04-05	1.1.2.61.61.61.7135	Dominican republic	Americas	Latin America and the Caribbean
SRR6899411	2017-07-03	1.1.2.61.61.61.7699	Dominican republic	Americas	Latin America and the Caribbean
SRR6919286	2017-07-04	1.1.2.61.61.61.7723	Dominican republic	Americas	Latin America and the Caribbean
SRR6898455	2017-07-05	1.1.2.61.61.61.7724	Dominican republic	Americas	Latin America and the Caribbean
SRR6898386	2017-07-24	1.1.2.61.61.61.7860	Dominican republic	Americas	Latin America and the Caribbean
SRR6921911	2017-08-02	1.1.2.61.61.61.7871	Dominican republic	Americas	Latin America and the Caribbean
SRR6900179	2017-08-02	1.1.2.61.61.61.7881	Dominican republic	Americas	Latin America and the Caribbean
SRR7426962	2017-08-01	1.1.2.61.61.61.7989	Dominican republic	Americas	Latin America and the Caribbean
SRR6922686	2017-08-22	1.1.2.61.61.61.8188	Dominican republic	Americas	Latin America and the Caribbean
SRR6920147	2017-08-29	1.1.2.61.61.61.8240	Dominican republic	Americas	Latin America and the Caribbean
SRR6900156	2017-08-30	1.1.2.61.61.61.8290	Dominican republic	Americas	Latin America and the Caribbean
SRR6922683	2017-10-12	1.1.2.61.61.61.8643	Dominican republic	Americas	Latin America and the Caribbean
SRR6897948	2017-10-18	1.1.2.61.61.61.8691	Dominican republic	Americas	Latin America and the Caribbean
SRR6919515	2017-12-04	1.1.2.61.61.61.8970	Dominican republic	Americas	Latin America and the Caribbean
SRR6919769	2017-08-29	1.1.2.61.61.61.9649	Dominican republic	Americas	Latin America and the Caribbean
SRR7533446	2018-05-15	1.1.2.61.61.61.9959	Dominican republic	Americas	Latin America and the Caribbean
SRR1958103	2014-10-10	1.1.2.61.61.729.905	Dominican republic	Americas	Latin America and the Caribbean
SRR3585348	2015-08-25	1.1.256.1101.1827.2165.3375	Dominican republic	Americas	Latin America and the Caribbean
SRR8711366	2015-09-17	1.1.256.1101.1827.2165.3530	Dominican republic	Americas	Latin America and the Caribbean
SRR8704615	2015-11-06	1.1.256.1101.1827.2165.3980	Dominican republic	Americas	Latin America and the Caribbean
SRR5193948	2016-06-09	1.1.256.1101.1827.2165.4781	Dominican republic	Americas	Latin America and the Caribbean
SRR7475501	2015-09-04	1.1.256.1101.1827.2516.4250	Dominican republic	Americas	Latin America and the Caribbean
SRR6918592	2017-12-20	1.1.256.1101.1827.4290.9050	Dominican republic	Americas	Latin America and the Caribbean
SRR7350732	2015-11-16	1.5.11.13.2030.2451.4068	Dominican republic	Americas	Latin America and the Caribbean
SRR7416263	2018-01-29	1.5.11.13.3364.4438.9310	Dominican republic	Americas	Latin America and the Caribbean
SRR5194051	2015-07-24	1.1.2.1074.1763.2074.3174	Egypt	Africa	Northern Africa
SRR5194069	2015-08-26	1.1.2.1100.1826.2164.3374	Egypt	Africa	Northern Africa
SRR5220411	2015-10-01	1.1.2.1100.1826.2164.3668	Egypt	Africa	Northern Africa
SRR1969115	2014-09-30	1.1.2.1326.544.571.2616	Egypt	Africa	Northern Africa
SRR8114907	2018-10-04	1.1.2.147.4014.5634.12083	Egypt	Africa	Northern Africa
SRR6922722	2016-12-02	1.1.2.1893.2623.3311.6382	Egypt	Africa	Northern Africa
SRR5216604	2015-09-23	1.1.2.2073.1887.2253.3599	Egypt	Africa	Northern Africa
SRR3285345	2015-11-13	1.1.2.2073.1887.2429.4019	Egypt	Africa	Northern Africa
SRR5215696	2016-03-10	1.1.2.2073.1887.2429.4499	Egypt	Africa	Northern Africa
SRR5193799	2016-06-01	1.1.2.2073.1887.2707.4761	Egypt	Africa	Northern Africa
SRR5216460	2016-10-25	1.1.2.2073.1887.3212.6091	Egypt	Africa	Northern Africa
SRR6901021	2017-10-03	1.1.2.2073.1887.4181.8600	Egypt	Africa	Northern Africa
SRR8377931	2018-07-24	1.1.2.2073.1887.4877.10512	Egypt	Africa	Northern Africa
SRR7439344	2015-10-07	1.1.2.2073.1933.2316.3755	Egypt	Africa	Northern Africa
SRR5216476	2016-10-18	1.1.2.2073.2557.3210.6074	Egypt	Africa	Northern Africa
SRR7892278	2017-08-09	1.1.2.2073.2557.3210.7914	Egypt	Africa	Northern Africa
SRR7842656	2018-07-04	1.1.2.2073.2557.4842.10379	Egypt	Africa	Northern Africa
SRR7873932	2018-08-22	1.1.2.2073.2557.5373.11491	Egypt	Africa	Northern Africa
SRR7997043	2018-09-26	1.1.2.2073.2557.5525.11899	Egypt	Africa	Northern Africa
SRR8172835	2018-09-25	1.1.2.2073.2557.5614.12017	Egypt	Africa	Northern Africa
SRR3286669	2015-05-06	1.1.2.2073.389.1688.2773	Egypt	Africa	Northern Africa
SRR3048808	2014-06-03	1.1.2.2073.389.1834.2560	Egypt	Africa	Northern Africa
SRR5193716	2015-08-03	1.1.2.2073.389.2101.3242	Egypt	Africa	Northern Africa
SRR3322381	2015-09-17	1.1.2.2073.389.2188.3440	Egypt	Africa	Northern Africa
SRR5193598	2015-09-09	1.1.2.2073.389.2224.3523	Egypt	Africa	Northern Africa
SRR3285350	2015-09-30	1.1.2.2073.389.2224.3655	Egypt	Africa	Northern Africa
SRR8704764	2015-12-04	1.1.2.2073.389.2224.4173	Egypt	Africa	Northern Africa
SRR6900954	2016-05-25	1.1.2.2073.389.2690.4708	Egypt	Africa	Northern Africa
SRR7879572	2018-07-25	1.1.2.2073.389.2854.10523	Egypt	Africa	Northern Africa
SRR8389679	2018-12-14	1.1.2.2073.389.2854.12576	Egypt	Africa	Northern Africa
SRR8479012	2019-01-09	1.1.2.2073.389.2854.12638	Egypt	Africa	Northern Africa
SRR8731027	2015-05-28	1.1.2.2073.389.2854.2854	Egypt	Africa	Northern Africa
SRR8724947	2015-07-02	1.1.2.2073.389.2854.3029	Egypt	Africa	Northern Africa
SRR5216497	2015-09-23	1.1.2.2073.389.2854.3614	Egypt	Africa	Northern Africa
SRR6918546	2017-07-04	1.1.2.2073.389.2854.7717	Egypt	Africa	Northern Africa
SRR6899347	2017-07-28	1.1.2.2073.389.2854.7909	Egypt	Africa	Northern Africa
SRR6897977	2017-07-20	1.1.2.2073.389.2854.7979	Egypt	Africa	Northern Africa
SRR6898832	2017-08-17	1.1.2.2073.389.2854.8132	Egypt	Africa	Northern Africa
SRR6899331	2017-09-07	1.1.2.2073.389.2854.8309	Egypt	Africa	Northern Africa
SRR6897877	2017-09-26	1.1.2.2073.389.2854.8495	Egypt	Africa	Northern Africa
SRR6897793	2017-09-27	1.1.2.2073.389.2854.8518	Egypt	Africa	Northern Africa
SRR6901067	2017-10-10	1.1.2.2073.389.2854.8656	Egypt	Africa	Northern Africa
SRR6900690	2017-10-16	1.1.2.2073.389.2854.8660	Egypt	Africa	Northern Africa
SRR6900651	2017-11-07	1.1.2.2073.389.2854.8812	Egypt	Africa	Northern Africa
SRR6922729	2017-11-09	1.1.2.2073.389.2854.8838	Egypt	Africa	Northern Africa
SRR6900270	2017-11-13	1.1.2.2073.389.2854.8860	Egypt	Africa	Northern Africa
SRR6899398	2017-11-16	1.1.2.2073.389.2854.8876	Egypt	Africa	Northern Africa
SRR6898851	2017-11-15	1.1.2.2073.389.2854.8880	Egypt	Africa	Northern Africa
SRR6921922	2017-11-28	1.1.2.2073.389.2854.8923	Egypt	Africa	Northern Africa
SRR6919299	2017-11-29	1.1.2.2073.389.2854.8939	Egypt	Africa	Northern Africa
SRR6920503	2017-12-01	1.1.2.2073.389.2854.8962	Egypt	Africa	Northern Africa
SRR6900922	2017-12-01	1.1.2.2073.389.2854.8963	Egypt	Africa	Northern Africa
SRR7285634	2018-01-16	1.1.2.2073.389.2854.9259	Egypt	Africa	Northern Africa
SRR8524434	2018-01-16	1.1.2.2073.389.2854.9260	Egypt	Africa	Northern Africa
SRR5220678	2016-06-29	1.1.2.2073.389.393.4897	Egypt	Africa	Northern Africa
SRR7209569	2018-04-10	1.1.2.2073.389.4677.9811	Egypt	Africa	Northern Africa
SRR7439423	2018-04-13	1.1.2.2073.389.4683.9819	Egypt	Africa	Northern Africa
SRR1963485	2015-01-14	1.1.2.2073.389.551.640	Egypt	Africa	Northern Africa
SRR1969451	2014-11-14	1.1.2.2073.624.667.813	Egypt	Africa	Northern Africa
SRR3048719	2014-10-03	1.1.2.2073.776.851.1082	Egypt	Africa	Northern Africa
SRR1970042	2014-10-06	1.1.2.2073.776.851.1224	Egypt	Africa	Northern Africa
SRR1968869	2014-09-09	1.1.2.219.219.219.1041	Egypt	Africa	Northern Africa
SRR1965547	2014-12-18	1.1.2.219.219.219.1385	Egypt	Africa	Northern Africa
SRR1966193	2014-11-05	1.1.2.219.219.219.219	Egypt	Africa	Northern Africa
SRR8998262	2019-04-17	1.1.2.219.4123.5897.12982	Egypt	Africa	Northern Africa
SRR8438037	2018-08-09	1.1.2.2545.3839.5331.11386	Egypt	Africa	Northern Africa
SRR7873982	2018-08-31	1.1.2.2545.3839.5331.11571	Egypt	Africa	Northern Africa
SRR8204778	2018-11-07	1.1.2.2652.4037.5692.12383	Egypt	Africa	Northern Africa
SRR8936167	2019-04-02	1.1.2.2678.4117.5884.12931	Egypt	Africa	Northern Africa
SRR1968551	2014-08-06	1.1.2.273.1454.1676.2308	Egypt	Africa	Northern Africa
SRR1968653	2014-08-18	1.1.2.273.273.273.2454	Egypt	Africa	Northern Africa
SRR1969078	2014-07-02	1.1.2.273.273.273.2614	Egypt	Africa	Northern Africa
SRR1967821	2014-05-07	1.1.2.273.273.273.273	Egypt	Africa	Northern Africa
SRR5220556	2015-04-29	1.1.2.273.273.273.2756	Egypt	Africa	Northern Africa
SRR5193181	2015-07-07	1.1.2.273.273.273.3024	Egypt	Africa	Northern Africa
SRR5216189	2015-07-10	1.1.2.273.273.273.3072	Egypt	Africa	Northern Africa
SRR5193483	2015-07-23	1.1.2.273.273.273.3149	Egypt	Africa	Northern Africa
SRR3285474	2015-08-06	1.1.2.273.273.273.3262	Egypt	Africa	Northern Africa
SRR3048817	2015-03-10	1.1.2.273.602.798.1403	Egypt	Africa	Northern Africa
SRR1963118	2014-12-22	1.1.2.273.602.798.1752	Egypt	Africa	Northern Africa
SRR5216290	2015-08-26	1.1.2.273.602.798.3366	Egypt	Africa	Northern Africa
SRR1966488	2014-11-05	1.1.2.273.602.798.996	Egypt	Africa	Northern Africa
SRR1957904	2014-10-31	1.1.2.273.602.820.1033	Egypt	Africa	Northern Africa
SRR6919255	2017-06-20	1.1.2.274.274.3900.7622	Egypt	Africa	Northern Africa
SRR8873669	2019-03-26	1.1.2.28.149.149.12887	Egypt	Africa	Northern Africa
SRR3286855	2015-06-17	1.1.2.28.149.149.149	Egypt	Africa	Northern Africa
SRR3284740	2015-04-21	1.1.2.28.1666.1924.2739	Egypt	Africa	Northern Africa
SRR7842481	2018-08-22	1.1.2.28.2230.2759.11489	Egypt	Africa	Northern Africa
SRR7879324	2018-09-04	1.1.2.28.2230.2759.11620	Egypt	Africa	Northern Africa
SRR7890396	2018-09-07	1.1.2.28.2230.2759.11670	Egypt	Africa	Northern Africa
SRR8292220	2018-11-27	1.1.2.28.2230.2759.12488	Egypt	Africa	Northern Africa
SRR8648353	2019-02-04	1.1.2.28.2230.2759.12710	Egypt	Africa	Northern Africa
SRR5194022	2016-06-28	1.1.2.28.2230.2759.4901	Egypt	Africa	Northern Africa
SRR5194216	2016-07-08	1.1.2.28.2230.2759.4948	Egypt	Africa	Northern Africa
SRR5216483	2016-07-21	1.1.2.28.2230.2759.5014	Egypt	Africa	Northern Africa
SRR6919482	2016-08-10	1.1.2.28.2230.2759.5148	Egypt	Africa	Northern Africa
SRR5193939	2016-11-07	1.1.2.28.2230.2759.6231	Egypt	Africa	Northern Africa
SRR5194166	2016-09-14	1.1.2.28.2461.3067.5599	Egypt	Africa	Northern Africa
SRR5216044	2016-11-03	1.1.2.28.2596.3266.6247	Egypt	Africa	Northern Africa
SRR6898815	2017-03-29	1.1.2.28.2936.3694.7109	Egypt	Africa	Northern Africa
SRR8375229	2018-07-19	1.1.2.28.2953.3726.10463	Egypt	Africa	Northern Africa
SRR8370541	2018-07-30	1.1.2.28.2953.3726.10540	Egypt	Africa	Northern Africa
SRR8333794	2018-08-14	1.1.2.28.2953.3726.11404	Egypt	Africa	Northern Africa
SRR7867053	2017-07-06	1.1.2.28.2953.3726.7733	Egypt	Africa	Northern Africa
SRR8648291	2017-08-11	1.1.2.28.2972.3765.7932	Egypt	Africa	Northern Africa
SRR1967433	2015-03-24	1.1.2.28.355.355.356	Egypt	Africa	Northern Africa
SRR1967878	2014-10-29	1.1.2.28.413.1419.1924	Egypt	Africa	Northern Africa
SRR7475472	2015-06-23	1.1.2.28.413.474.519	Egypt	Africa	Northern Africa
SRR3049397	2014-06-10	1.1.2.28.415.1126.1500	Egypt	Africa	Northern Africa
SRR8704849	2015-11-04	1.1.2.28.415.1126.4017	Egypt	Africa	Northern Africa
SRR1970278	2014-08-06	1.1.2.28.415.1171.1563	Egypt	Africa	Northern Africa
SRR1957907	2014-07-10	1.1.2.28.415.1326.1787	Egypt	Africa	Northern Africa
SRR1959285	2014-12-31	1.1.2.28.415.422.1208	Egypt	Africa	Northern Africa
SRR1957993	2014-09-03	1.1.2.28.415.422.1356	Egypt	Africa	Northern Africa
SRR1968658	2014-08-19	1.1.2.28.415.422.1806	Egypt	Africa	Northern Africa
SRR7465131	2018-05-30	1.1.2.28.43.1319.10043	Egypt	Africa	Northern Africa
SRR7457147	2018-05-30	1.1.2.28.43.1319.10070	Egypt	Africa	Northern Africa
SRR7480125	2018-06-25	1.1.2.28.43.1319.10128	Egypt	Africa	Northern Africa
SRR7828410	2018-07-18	1.1.2.28.43.1319.10473	Egypt	Africa	Northern Africa
SRR7873801	2018-07-23	1.1.2.28.43.1319.10511	Egypt	Africa	Northern Africa
SRR7884499	2018-09-10	1.1.2.28.43.1319.11346	Egypt	Africa	Northern Africa
SRR8166254	2018-09-12	1.1.2.28.43.1319.11696	Egypt	Africa	Northern Africa
SRR8184522	2018-10-11	1.1.2.28.43.1319.11747	Egypt	Africa	Northern Africa
SRR7962275	2018-09-20	1.1.2.28.43.1319.11805	Egypt	Africa	Northern Africa
SRR7996980	2018-09-26	1.1.2.28.43.1319.11868	Egypt	Africa	Northern Africa
SRR7997115	2018-09-24	1.1.2.28.43.1319.12004	Egypt	Africa	Northern Africa
SRR8098325	2018-09-27	1.1.2.28.43.1319.12039	Egypt	Africa	Northern Africa
SRR8484193	2018-10-02	1.1.2.28.43.1319.12058	Egypt	Africa	Northern Africa
SRR8098353	2018-10-03	1.1.2.28.43.1319.12110	Egypt	Africa	Northern Africa
SRR8087140	2018-10-09	1.1.2.28.43.1319.12120	Egypt	Africa	Northern Africa
SRR8182732	2018-10-23	1.1.2.28.43.1319.12219	Egypt	Africa	Northern Africa
SRR8490773	2018-10-23	1.1.2.28.43.1319.12294	Egypt	Africa	Northern Africa
SRR8281280	2018-11-20	1.1.2.28.43.1319.12454	Egypt	Africa	Northern Africa
SRR8380678	2018-12-17	1.1.2.28.43.1319.12563	Egypt	Africa	Northern Africa
SRR8401416	2018-12-21	1.1.2.28.43.1319.12569	Egypt	Africa	Northern Africa
SRR8514503	2018-02-22	1.1.2.28.43.1319.9508	Egypt	Africa	Northern Africa
SRR7359079	2018-02-22	1.1.2.28.43.1319.9531	Egypt	Africa	Northern Africa
SRR3286680	2015-04-23	1.1.2.28.43.1923.2735	Egypt	Africa	Northern Africa
SRR7187234	2015-04-30	1.1.2.28.43.1923.2762	Egypt	Africa	Northern Africa
SRR3048944	2014-12-19	1.1.2.28.43.380.1195	Egypt	Africa	Northern Africa
SRR8281255	2018-11-22	1.1.2.28.43.380.12469	Egypt	Africa	Northern Africa
SRR5220947	2015-04-08	1.1.2.28.43.380.1376	Egypt	Africa	Northern Africa
SRR1968195	2015-03-09	1.1.2.28.43.380.1524	Egypt	Africa	Northern Africa
SRR1966497	2014-11-26	1.1.2.28.43.380.1779	Egypt	Africa	Northern Africa
SRR1968505	2014-12-08	1.1.2.28.43.380.1910	Egypt	Africa	Northern Africa
SRR1968917	2015-02-03	1.1.2.28.43.380.2120	Egypt	Africa	Northern Africa
SRR7474903	2015-07-07	1.1.2.28.43.380.3019	Egypt	Africa	Northern Africa
SRR7350790	2015-08-14	1.1.2.28.43.380.3338	Egypt	Africa	Northern Africa
SRR7414984	2015-09-15	1.1.2.28.43.380.3621	Egypt	Africa	Northern Africa
SRR5220109	2015-10-19	1.1.2.28.43.380.3796	Egypt	Africa	Northern Africa
SRR1957949	2014-10-14	1.1.2.28.43.380.387	Egypt	Africa	Northern Africa
SRR1958409	2014-09-01	1.1.2.28.43.380.403	Egypt	Africa	Northern Africa
SRR5220465	2015-11-24	1.1.2.28.43.380.4102	Egypt	Africa	Northern Africa
SRR3286649	2015-05-08	1.1.2.28.43.380.464	Egypt	Africa	Northern Africa
SRR6922681	2017-11-07	1.1.2.28.43.4242.8813	Egypt	Africa	Northern Africa
SRR7902690	2018-01-16	1.1.2.28.43.4242.9269	Egypt	Africa	Northern Africa
SRR1969419	2014-05-13	1.1.2.28.43.43.1407	Egypt	Africa	Northern Africa
SRR3049098	2015-03-10	1.1.2.28.43.43.1841	Egypt	Africa	Northern Africa
SRR1968428	2014-07-08	1.1.2.28.43.43.425	Egypt	Africa	Northern Africa
SRR1967719	2014-06-23	1.1.2.28.43.43.43	Egypt	Africa	Northern Africa
SRR8492397	2018-06-19	1.1.2.28.43.4782.10140	Egypt	Africa	Northern Africa
SRR8377940	2018-12-12	1.1.2.28.43.5747.12554	Egypt	Africa	Northern Africa
SRR8375206	2018-08-01	1.1.2.28.43.883.10573	Egypt	Africa	Northern Africa
SRR1959398	2014-11-12	1.1.2.28.43.883.1132	Egypt	Africa	Northern Africa
SRR8098380	2018-09-26	1.1.2.28.43.883.11873	Egypt	Africa	Northern Africa
SRR8269033	2018-11-13	1.1.2.28.43.883.12443	Egypt	Africa	Northern Africa
SRR8325628	2018-12-03	1.1.2.28.43.883.12501	Egypt	Africa	Northern Africa
SRR8492301	2019-01-10	1.1.2.28.43.883.12644	Egypt	Africa	Northern Africa
SRR8552361	2019-01-22	1.1.2.28.43.883.12675	Egypt	Africa	Northern Africa
SRR8724960	2019-02-28	1.1.2.28.43.883.12798	Egypt	Africa	Northern Africa
SRR5216488	2016-01-12	1.1.2.28.43.883.4317	Egypt	Africa	Northern Africa
SRR6898954	2016-03-17	1.1.2.28.43.883.4527	Egypt	Africa	Northern Africa
SRR6918298	2017-06-08	1.1.2.28.43.883.7442	Egypt	Africa	Northern Africa
SRR6918612	2017-10-11	1.1.2.28.43.883.8649	Egypt	Africa	Northern Africa
SRR1968985	2014-05-08	1.1.2.28.469.486.709	Egypt	Africa	Northern Africa
SRR1969736	2015-02-05	1.1.2.28.469.486.858	Egypt	Africa	Northern Africa
SRR1965408	2014-08-15	1.1.2.28.490.1718.2376	Egypt	Africa	Northern Africa
SRR6900115	2016-12-05	1.1.2.28.490.3307.6377	Egypt	Africa	Northern Africa
SRR1960070	2015-01-07	1.1.2.28.490.508.1057	Egypt	Africa	Northern Africa
SRR1960353	2014-12-11	1.1.2.28.490.508.1521	Egypt	Africa	Northern Africa
SRR1969444	2014-12-05	1.1.2.28.490.508.1707	Egypt	Africa	Northern Africa
SRR7457877	2015-06-17	1.1.2.28.490.508.2956	Egypt	Africa	Northern Africa
SRR1969196	2014-08-01	1.1.2.28.490.508.573	Egypt	Africa	Northern Africa
SRR1968083	2014-08-04	1.1.2.28.520.541.623	Egypt	Africa	Northern Africa
SRR3284692	2015-07-13	1.1.2.28.535.1168.3057	Egypt	Africa	Northern Africa
SRR1968065	2014-08-27	1.1.2.28.535.558.1014	Egypt	Africa	Northern Africa
SRR1968003	2015-03-26	1.1.2.28.535.558.2061	Egypt	Africa	Northern Africa
SRR1966775	2015-03-16	1.1.2.28.535.558.648	Egypt	Africa	Northern Africa
SRR8419406	2018-12-21	1.1.2.28.535.5758.12596	Egypt	Africa	Northern Africa
SRR1968156	2014-10-07	1.1.2.28.535.692.2095	Egypt	Africa	Northern Africa
SRR1969120	2014-09-29	1.1.2.28.535.692.847	Egypt	Africa	Northern Africa
SRR1966995	2014-09-18	1.1.2.28.535.692.954	Egypt	Africa	Northern Africa
SRR5220922	2015-07-27	1.1.2.28.538.2073.3171	Egypt	Africa	Northern Africa
SRR6918524	2017-05-04	1.1.2.28.538.3736.7241	Egypt	Africa	Northern Africa
SRR7480287	2015-05-18	1.1.2.28.538.562.2802	Egypt	Africa	Northern Africa
SRR8706125	2015-10-28	1.1.2.28.538.562.3934	Egypt	Africa	Northern Africa
SRR1965165	2014-10-07	1.1.2.28.870.1151.1532	Egypt	Africa	Northern Africa
SRR5220832	2015-09-25	1.1.2.28.870.1996.3682	Egypt	Africa	Northern Africa
SRR5216242	2015-10-14	1.1.2.28.870.1996.3817	Egypt	Africa	Northern Africa
SRR8704627	2015-11-26	1.1.2.28.870.1996.4108	Egypt	Africa	Northern Africa
SRR8333792	2018-08-14	1.1.2.28.870.3930.11398	Egypt	Africa	Northern Africa
SRR6922714	2017-07-05	1.1.2.28.870.3930.7719	Egypt	Africa	Northern Africa
SRR1968151	2014-09-03	1.1.2.28.870.969.1243	Egypt	Africa	Northern Africa
SRR7251497	2014-09-03	1.1.2.28.870.969.1644	Egypt	Africa	Northern Africa
SRR7501695	2015-05-01	1.1.2.32.1671.1932.2758	Egypt	Africa	Northern Africa
SRR7351421	2015-09-01	1.1.2.32.1671.1932.3458	Egypt	Africa	Northern Africa
SRR7962207	2018-09-19	1.1.2.32.1671.4117.11820	Egypt	Africa	Northern Africa
SRR8149435	2018-10-04	1.1.2.32.1671.4117.12087	Egypt	Africa	Northern Africa
SRR8106802	2018-10-04	1.1.2.32.1671.4117.12088	Egypt	Africa	Northern Africa
SRR8116974	2018-10-16	1.1.2.32.1671.4117.12189	Egypt	Africa	Northern Africa
SRR6900952	2017-09-27	1.1.2.32.1671.4157.8531	Egypt	Africa	Northern Africa
SRR7369081	2015-07-29	1.1.2.32.1766.2086.3208	Egypt	Africa	Northern Africa
SRR1957746	2014-06-24	1.1.2.359.1229.1400.1900	Egypt	Africa	Northern Africa
SRR1965767	2014-06-26	1.1.2.359.1232.1403.1904	Egypt	Africa	Northern Africa
SRR1965773	2014-07-03	1.1.2.359.1468.1694.2335	Egypt	Africa	Northern Africa
SRR1967012	2014-07-25	1.1.2.359.367.368.1085	Egypt	Africa	Northern Africa
SRR1967970	2015-02-16	1.1.2.359.367.368.2471	Egypt	Africa	Northern Africa
SRR1966966	2014-11-18	1.1.2.359.367.368.372	Egypt	Africa	Northern Africa
SRR1966337	2014-04-23	1.1.2.359.380.383.1343	Egypt	Africa	Northern Africa
SRR3049444	2014-06-18	1.1.2.359.380.383.390	Egypt	Africa	Northern Africa
SRR7850497	2018-08-13	1.1.2.359.616.5343.11416	Egypt	Africa	Northern Africa
SRR7172614	2015-04-08	1.1.2.393.425.435.2162	Egypt	Africa	Northern Africa
SRR1965349	2015-03-03	1.1.2.393.425.435.773	Egypt	Africa	Northern Africa
SRR7414772	2018-05-10	1.1.2.64.3557.4721.9944	Egypt	Africa	Northern Africa
SRR7842682	2018-08-09	1.1.2.64.64.1930.11382	Egypt	Africa	Northern Africa
SRR8754466	2019-03-07	1.1.2.64.64.1930.12820	Egypt	Africa	Northern Africa
SRR8758321	2019-03-01	1.1.2.64.64.1930.12826	Egypt	Africa	Northern Africa
SRR5194131	2015-10-05	1.1.2.64.64.1930.3714	Egypt	Africa	Northern Africa
SRR8503760	2018-04-16	1.1.2.64.64.4684.9820	Egypt	Africa	Northern Africa
SRR8484232	2018-11-07	1.1.2.64.64.5693.12387	Egypt	Africa	Northern Africa
SRR8325633	2018-12-04	1.1.2.64.64.5693.12508	Egypt	Africa	Northern Africa
SRR1966277	2014-08-06	1.1.2.64.64.64.942	Egypt	Africa	Northern Africa
SRR6920130	2016-08-11	1.1.329.1318.2284.2836.5130	Egypt	Africa	Northern Africa
SRR5215489	2015-08-26	1.11.48.154.1148.1301.3349	Egypt	Africa	Northern Africa
SRR5193782	2016-01-13	1.2.3.1229.2090.2538.4316	Egypt	Africa	Northern Africa
SRR1968543	2015-03-31	1.2.3.18.1207.1370.1858	Egypt	Africa	Northern Africa
SRR4063716	2015-05-05	1.2.3.18.359.360.2409	Egypt	Africa	Northern Africa
SRR7523772	2015-09-07	1.2.3.18.458.472.3037	Egypt	Africa	Northern Africa
SRR7528166	2015-10-09	1.2.3.18.599.639.3757	Egypt	Africa	Northern Africa
SRR1959270	2014-12-30	1.2.3.18.599.639.772	Egypt	Africa	Northern Africa
SRR5220545	2015-09-01	1.1.2.1117.1849.2197.3457	France	Europe	Western Europe
SRR6900142	2017-08-09	1.1.2.2073.2557.3210.7868	France	Europe	Western Europe
SRR6922615	2017-09-08	1.11.48.2344.3174.4098.8359	France	Europe	Western Europe
SRR8272649	2018-09-10	1.2.3.151.151.783.11676	France	Europe	Western Europe
SRR6920446	2016-04-28	1.2.3.151.151.783.4627	France	Europe	Western Europe
SRR8084193	2018-10-09	1.5.757.2642.4018.5647.12152	France	Europe	Western Europe
SRR8711633	2015-10-20	1.7.14.1169.1973.2359.3829	France	Europe	Western Europe
SRR5194224	2016-09-01	3.4.49.1671.2418.3014.5461	France	Europe	Western Europe
SRR1958370	2014-10-08	3.4.8.307.677.731.907	France	Europe	Western Europe
SRR5216596	2016-06-02	8.14.59.1281.2200.2701.4747	France	Europe	Western Europe
SRR5194088	2016-09-28	8.14.59.1828.2495.3122.5814	France	Europe	Western Europe
SRR5216409	2016-09-07	8.23.121.1693.2450.3054.5551	France	Europe	Western Europe
SRR6900354	2017-09-28	1.1.2.12.12.4034.8538	Greece	Europe	Southern Europe
SRR7465102	2018-04-25	1.1.2.12.421.429.9840	Greece	Europe	Southern Europe
SRR7892290	2018-09-11	1.1.2.237.3136.4038.11530	Greece	Europe	Southern Europe
SRR5632086	2017-01-11	1.1.2.28.195.2365.6857	Greece	Europe	Southern Europe
SRR6898077	2016-10-11	1.1.2.80.100.100.5932	Greece	Europe	Southern Europe
SRR6918631	2017-10-03	1.1.2.80.1903.2273.8568	Greece	Europe	Southern Europe
SRR5215537	2016-03-15	1.11.306.1254.2142.2609.4511	Greece	Europe	Southern Europe
SRR7221366	2015-09-04	1.11.48.1093.1814.2150.3348	Greece	Europe	Southern Europe
SRR7456899	2015-09-07	1.11.48.1093.1814.2150.3471	Greece	Europe	Southern Europe
SRR5216440	2015-09-09	1.11.48.1093.1814.2150.3486	Greece	Europe	Southern Europe
SRR6898447	2017-05-15	1.11.48.1309.2967.3759.7301	Greece	Europe	Southern Europe
SRR1958269	2014-09-12	1.11.48.148.148.148.148	Greece	Europe	Southern Europe
SRR8490666	2018-07-04	1.11.48.2530.3611.4822.10296	Greece	Europe	Southern Europe
SRR8490645	2018-07-04	1.11.48.2530.3611.4822.10320	Greece	Europe	Southern Europe
SRR8441124	2018-07-02	1.11.48.2532.3614.4828.10312	Greece	Europe	Southern Europe
SRR7874119	2018-09-05	1.11.48.256.3872.5411.11622	Greece	Europe	Southern Europe
SRR7841575	2018-08-07	1.11.67.104.2359.5314.11343	Greece	Europe	Southern Europe
SRR5194111	2016-03-08	1.2.3.151.1707.1980.2896	Greece	Europe	Southern Europe
SRR7841546	2018-08-31	1.2.3.18.175.175.11564	Greece	Europe	Southern Europe
SRR4063757	2015-09-04	1.2.3.18.1859.2211.3495	Greece	Europe	Southern Europe
SRR7350636	2015-10-29	1.2.3.18.323.2409.3971	Greece	Europe	Southern Europe
SRR6919936	2016-07-19	1.2.3.18.323.2409.4964	Greece	Europe	Southern Europe
SRR6920167	2016-07-12	1.2.3.18.323.2409.4977	Greece	Europe	Southern Europe
SRR5216151	2016-08-11	1.2.3.18.323.2409.5133	Greece	Europe	Southern Europe
SRR6918595	2016-09-26	1.2.3.18.323.2409.5713	Greece	Europe	Southern Europe
SRR5193595	2016-10-26	1.2.3.18.323.2409.6123	Greece	Europe	Southern Europe
SRR5194064	2016-10-11	1.2.3.18.359.360.5929	Greece	Europe	Southern Europe
SRR6920454	2017-09-26	1.2.3.18.359.360.5969	Greece	Europe	Southern Europe
SRR6897715	2017-09-20	1.2.3.18.359.360.8444	Greece	Europe	Southern Europe
SRR1957820	2014-09-23	1.2.3.18.38.38.2163	Greece	Europe	Southern Europe
SRR6919756	2017-10-16	1.2.3.18.62.4193.8661	Greece	Europe	Southern Europe
SRR7962184	2018-09-13	1.2.3.18.62.62.11720	Greece	Europe	Southern Europe
SRR1969962	2014-08-15	1.2.3.18.62.62.1640	Greece	Europe	Southern Europe
SRR1969384	2014-09-17	1.2.3.18.62.62.2072	Greece	Europe	Southern Europe
SRR6920149	2016-09-20	1.2.3.18.62.62.4841	Greece	Europe	Southern Europe
SRR6919213	2016-07-19	1.2.3.18.62.62.4994	Greece	Europe	Southern Europe
SRR5220565	2016-08-26	1.2.3.18.62.62.5044	Greece	Europe	Southern Europe
SRR6922024	2016-09-02	1.2.3.18.62.62.5089	Greece	Europe	Southern Europe
SRR5193409	2016-08-15	1.2.3.18.62.62.5137	Greece	Europe	Southern Europe
SRR5193860	2016-08-24	1.2.3.18.62.62.5232	Greece	Europe	Southern Europe
SRR5215772	2016-09-14	1.2.3.18.62.62.5250	Greece	Europe	Southern Europe
SRR6919784	2016-08-23	1.2.3.18.62.62.5252	Greece	Europe	Southern Europe
SRR5194263	2016-08-23	1.2.3.18.62.62.5275	Greece	Europe	Southern Europe
SRR5220106	2016-09-02	1.2.3.18.62.62.5464	Greece	Europe	Southern Europe
SRR5220670	2016-09-06	1.2.3.18.62.62.5522	Greece	Europe	Southern Europe
SRR5194019	2016-09-13	1.2.3.18.62.62.5654	Greece	Europe	Southern Europe
SRR5194258	2016-08-31	1.2.3.18.62.62.5671	Greece	Europe	Southern Europe
SRR6920477	2016-09-20	1.2.3.18.62.62.5721	Greece	Europe	Southern Europe
SRR5216326	2016-10-04	1.2.3.18.62.62.5879	Greece	Europe	Southern Europe
SRR5216187	2016-10-13	1.2.3.18.62.62.5954	Greece	Europe	Southern Europe
SRR6919764	2017-06-16	1.2.3.18.62.62.7689	Greece	Europe	Southern Europe
SRR5220314	2015-10-15	12.28.160.283.283.283.2726	Greece	Europe	Southern Europe
SRR5757214	2015-07-07	19.43.240.1058.1733.2034.3047	Greece	Europe	Southern Europe
SRR7408396	2018-06-12	69.136.711.2525.3590.4770.10105	Greece	Europe	Southern Europe
SRR1965781	2014-10-01	8.14.59.168.168.168.168	Greece	Europe	Southern Europe
SRR6900081	2017-11-09	1.1.2.174.3252.4248.8839	China	Asia	Eastern Asia
SRR7426509	2018-05-01	1.1.2.174.3252.4262.9884	China	Asia	Eastern Asia
SRR6900748	2017-12-06	1.1.2.206.3277.4302.8987	China	Asia	Eastern Asia
SRR1960611	2014-12-02	1.1.2.4.4.1165.1771	China	Asia	Eastern Asia
SRR8367072	2018-12-11	1.1.2.7.4063.5743.12544	China	Asia	Eastern Asia
SRR5193864	2016-05-10	1.1.2.7.426.2668.4649	China	Asia	Eastern Asia
SRR5220656	2015-07-08	1.1.200.491.1742.2046.3103	China	Asia	Eastern Asia
SRR6922653	2016-05-05	1.2.3.151.362.363.4662	China	Asia	Eastern Asia
SRR6919039	2016-05-09	4.70.312.1272.2185.2674.4661	China	Asia	Eastern Asia
SRR7495566	2018-05-22	1.1.2.152.152.2430.9992	Hungary	Europe	Eastern Europe
SRR6898331	2017-10-24	1.1.2.1705.3234.4212.8718	Hungary	Europe	Eastern Europe
SRR5194236	2016-06-24	1.1.2.26.26.2722.4896	Hungary	Europe	Eastern Europe
SRR1969627	2015-01-14	1.11.48.146.1630.1882.2633	Hungary	Europe	Eastern Europe
SRR7298404	2015-12-03	1.2.3.1204.2044.2473.4131	Hungary	Europe	Eastern Europe
SRR5216317	2016-09-21	1.2.3.18.175.175.5732	Hungary	Europe	Eastern Europe
SRR5193466	2016-09-30	1.2.3.18.175.175.5855	Hungary	Europe	Eastern Europe
SRR8490667	2018-07-03	1.2.3.18.175.175.9937	Hungary	Europe	Eastern Europe
SRR5220917	2016-09-16	1.2.3.18.180.180.11080	Hungary	Europe	Eastern Europe
SRR6924097	2017-10-18	1.2.3.18.2634.3335.8678	Hungary	Europe	Eastern Europe
SRR5193980	2016-08-31	1.2.3.18.3698.5100.10908	Hungary	Europe	Eastern Europe
SRR1967905	2014-05-21	1.2.3.18.458.472.517	Hungary	Europe	Eastern Europe
SRR3049341	2014-04-28	1.2.3.18.642.689.843	Hungary	Europe	Eastern Europe
SRR4063708	2015-06-03	1.2.3.22.1705.1978.2892	Hungary	Europe	Eastern Europe
SRR8201796	2018-10-02	1.2.3.22.22.3334.12052	Hungary	Europe	Eastern Europe
SRR8283330	2018-11-19	1.2.3.22.22.3334.12459	Hungary	Europe	Eastern Europe
SRR4063735	2015-09-04	1.2.3.3.1851.2200.3466	Hungary	Europe	Eastern Europe
SRR5194245	2016-09-14	1.5.464.1699.2459.3065.5596	Hungary	Europe	Eastern Europe
SRR1965831	2014-08-15	1.5.69.111.111.111.111	Hungary	Europe	Eastern Europe
SRR3321873	2015-04-24	1.1.2.1025.1663.1919.2720	India	Asia	Southern Asia
SRR5215635	2016-10-07	1.1.2.1028.1673.3149.5893	India	Asia	Southern Asia
SRR6918351	2017-12-19	1.1.2.1028.1673.4329.9049	India	Asia	Southern Asia
SRR8114870	2018-09-27	1.1.2.1028.1673.5620.12037	India	Asia	Southern Asia
SRR8704717	2015-11-27	1.1.2.1028.2048.2479.4144	India	Asia	Southern Asia
SRR8474028	2019-01-03	1.1.2.1030.4075.5768.12620	India	Asia	Southern Asia
SRR5193821	2015-09-18	1.1.2.1125.1868.2220.3511	India	Asia	Southern Asia
SRR6901074	2015-12-23	1.1.2.1218.2065.2497.4210	India	Asia	Southern Asia
SRR5194199	2016-06-01	1.1.2.1284.2204.2709.4766	India	Asia	Southern Asia
SRR8730996	2015-05-08	1.1.2.1326.447.461.1171	India	Asia	Southern Asia
SRR5194002	2016-10-18	1.1.2.165.165.165.5198	India	Asia	Southern Asia
SRR7274982	2018-02-23	1.1.2.178.1855.4562.9526	India	Asia	Southern Asia
SRR8325576	2018-12-05	1.1.2.178.3157.4073.12517	India	Asia	Southern Asia
SRR1966874	2015-02-23	1.1.2.2.2.2.1198	India	Asia	Southern Asia
SRR1960954	2015-01-07	1.1.2.2.2.2.1962	India	Asia	Southern Asia
SRR1966183	2014-05-08	1.1.2.2.2.2.2	India	Asia	Southern Asia
SRR1969064	2014-05-15	1.1.2.2.2.2.2443	India	Asia	Southern Asia
SRR1960057	2015-01-09	1.1.2.2.2.2.891	India	Asia	Southern Asia
SRR7458178	2018-01-23	1.1.2.2073.389.2854.8939	India	Asia	Southern Asia
SRR7286964	2018-02-06	1.1.2.2073.389.2854.9357	India	Asia	Southern Asia
SRR1969411	2014-11-26	1.1.2.214.1049.1181.1577	India	Asia	Southern Asia
SRR6924049	2017-08-14	1.1.2.2315.3095.3950.7801	India	Asia	Southern Asia
SRR8503983	2018-04-06	1.1.2.2508.3526.4658.9770	India	Asia	Southern Asia
SRR8893154	2019-04-02	1.1.2.274.274.5879.12916	India	Asia	Southern Asia
SRR5194193	2016-11-23	1.1.2.28.149.149.6341	India	Asia	Southern Asia
SRR5220291	2015-12-16	1.1.2.284.284.791.4219	India	Asia	Southern Asia
SRR1969852	2014-09-16	1.1.2.350.762.835.1061	India	Asia	Southern Asia
SRR1959229	2014-10-24	1.1.2.66.1231.1402.1902	India	Asia	Southern Asia
SRR3048821	2014-07-21	1.1.2.66.66.66.66	India	Asia	Southern Asia
SRR7426496	2015-11-18	1.1.2.994.1576.1817.4054	India	Asia	Southern Asia
SRR5220931	2015-12-07	1.1.2.994.2058.2489.4169	India	Asia	Southern Asia
SRR5193601	2016-10-31	1.1.2.994.2563.3221.6137	India	Asia	Southern Asia
SRR6897818	2017-11-01	1.1.2.994.3242.4228.8769	India	Asia	Southern Asia
SRR7443943	2018-04-12	1.1.2.994.3242.4228.9810	India	Asia	Southern Asia
SRR8114918	2018-10-05	1.2.3.18.175.175.9845	India	Asia	Southern Asia
SRR8503801	2018-04-11	1.2.3.18.180.180.10861	India	Asia	Southern Asia
SRR5216050	2016-12-30	1.2.3.18.2769.3503.6731	India	Asia	Southern Asia
SRR8131563	2018-10-05	1.2.3.18.353.1560.12090	India	Asia	Southern Asia
SRR6919272	2017-05-16	1.3.154.1021.2971.3764.7309	India	Asia	Southern Asia
SRR5193849	2016-05-16	1.3.310.1267.2177.2666.4645	India	Asia	Southern Asia
SRR8735155	2015-05-07	1.39.227.1032.1680.1945.2784	India	Asia	Southern Asia
SRR5215676	2016-11-28	1.5.159.280.280.280.6321	India	Asia	Southern Asia
SRR6901120	2017-05-23	20.53.283.2249.2939.3700.7322	India	Asia	Southern Asia
SRR8249768	2018-11-15	20.53.283.2657.4045.5705.12432	India	Asia	Southern Asia
SRR1965963	2015-01-21	4.31.193.423.488.506.568	India	Asia	Southern Asia
SRR6900943	2016-06-08	4.31.316.1287.2208.2714.4778	India	Asia	Southern Asia
SRR5193960	2016-08-16	4.31.331.1321.2291.2844.5155	India	Asia	Southern Asia
SRR6919768	2017-10-23	4.44.672.2365.3236.4215.8724	India	Asia	Southern Asia
SRR5216337	2016-02-29	56.68.304.1248.2131.2594.4470	India	Asia	Southern Asia
SRR7879567	2018-07-17	56.68.717.2536.3629.4859.10455	India	Asia	Southern Asia
SRR3049240	2014-06-06	56.9.21.24.24.24.24	India	Asia	Southern Asia
SRR8114913	2018-09-25	1.1.2.116.2151.2624.11997	Indonesia	Asia	South-eastern Asia
SRR5216407	2016-03-30	1.1.2.116.2151.2624.4542	Indonesia	Asia	South-eastern Asia
SRR5216531	2016-09-28	1.1.2.116.2151.2624.5792	Indonesia	Asia	South-eastern Asia
SRR3284684	2015-11-06	1.1.2.244.2013.2422.4006	Indonesia	Asia	South-eastern Asia
SRR1966512	2014-08-12	1.1.2.28.1489.1719.2377	Indonesia	Asia	South-eastern Asia
SRR5220827	2015-06-25	1.1.2.28.1725.2018.2983	Indonesia	Asia	South-eastern Asia
SRR1965651	2015-03-05	1.1.2.28.195.195.1128	Indonesia	Asia	South-eastern Asia
SRR8172801	2018-10-09	1.1.2.28.195.195.12134	Indonesia	Asia	South-eastern Asia
SRR6899360	2017-06-06	1.1.2.28.195.195.279	Indonesia	Asia	South-eastern Asia
SRR7475352	2015-09-25	1.1.2.28.195.195.3651	Indonesia	Asia	South-eastern Asia
SRR1969366	2014-07-23	1.1.2.28.195.195.658	Indonesia	Asia	South-eastern Asia
SRR3049526	2015-01-26	1.1.2.28.195.195.761	Indonesia	Asia	South-eastern Asia
SRR6919027	2017-07-26	1.1.2.28.195.195.7886	Indonesia	Asia	South-eastern Asia
SRR6922560	2017-09-26	1.1.2.28.195.195.8493	Indonesia	Asia	South-eastern Asia
SRR8724933	2015-06-18	1.1.2.28.195.2020.2986	Indonesia	Asia	South-eastern Asia
SRR7450697	2015-08-17	1.1.2.28.195.2139.3325	Indonesia	Asia	South-eastern Asia
SRR6918305	2016-06-01	1.1.2.28.195.2702.4749	Indonesia	Asia	South-eastern Asia
SRR5633142	2017-01-24	1.1.2.28.195.3041.6888	Indonesia	Asia	South-eastern Asia
SRR6918892	2017-09-20	1.1.2.28.195.3041.8446	Indonesia	Asia	South-eastern Asia
SRR7828441	2018-07-17	1.1.2.28.195.4863.10461	Indonesia	Asia	South-eastern Asia
SRR7885285	2018-08-23	1.1.2.28.195.5381.11513	Indonesia	Asia	South-eastern Asia
SRR8084281	2018-10-02	1.1.2.28.195.5629.12064	Indonesia	Asia	South-eastern Asia
SRR8758307	2019-03-06	1.1.2.28.195.5704.12823	Indonesia	Asia	South-eastern Asia
SRR8419410	2018-12-28	1.1.2.28.195.5757.12594	Indonesia	Asia	South-eastern Asia
SRR6919163	2016-07-26	1.1.2.28.2261.2800.5025	Indonesia	Asia	South-eastern Asia
SRR8509435	2018-03-15	1.1.2.28.3508.4626.9711	Indonesia	Asia	South-eastern Asia
SRR7439309	2018-06-06	1.1.2.28.3510.4630.10075	Indonesia	Asia	South-eastern Asia
SRR8149140	2018-10-03	1.1.2.28.3510.4630.12100	Indonesia	Asia	South-eastern Asia
SRR8435771	2018-10-09	1.1.2.28.3510.4630.12125	Indonesia	Asia	South-eastern Asia
SRR7480444	2018-06-22	1.1.2.28.3510.4799.10223	Indonesia	Asia	South-eastern Asia
SRR8172814	2018-10-24	1.1.2.28.3510.5680.12308	Indonesia	Asia	South-eastern Asia
SRR5194016	2016-09-02	1.1.2.28.354.2047.5331	Indonesia	Asia	South-eastern Asia
SRR5193424	2017-01-06	1.1.2.28.354.2047.6831	Indonesia	Asia	South-eastern Asia
SRR6920135	2017-09-11	1.1.2.28.354.2047.8327	Indonesia	Asia	South-eastern Asia
SRR6919994	2017-10-27	1.1.2.28.354.3302.8727	Indonesia	Asia	South-eastern Asia
SRR7415019	2015-08-14	1.1.2.28.354.354.3335	Indonesia	Asia	South-eastern Asia
SRR6900724	2017-09-29	1.1.2.28.354.3855.8562	Indonesia	Asia	South-eastern Asia
SRR7468920	2018-06-18	1.1.2.28.354.4788.10168	Indonesia	Asia	South-eastern Asia
SRR7841623	2018-07-18	1.1.2.28.354.4871.10482	Indonesia	Asia	South-eastern Asia
SRR8106794	2018-10-08	1.1.2.28.354.5640.12115	Indonesia	Asia	South-eastern Asia
SRR1969261	2015-03-03	1.1.2.28.354.574.679	Indonesia	Asia	South-eastern Asia
SRR8738279	2019-03-04	1.1.2.28.4103.5845.12811	Indonesia	Asia	South-eastern Asia
SRR6919115	2017-07-18	1.1.2.30.2558.3971.7902	Indonesia	Asia	South-eastern Asia
SRR7528052	2015-08-04	1.1.2.35.1779.2100.3240	Indonesia	Asia	South-eastern Asia
SRR5220902	2015-08-12	1.1.2.35.1789.2114.3279	Indonesia	Asia	South-eastern Asia
SRR6922564	2017-10-23	1.1.2.35.1789.4196.8725	Indonesia	Asia	South-eastern Asia
SRR8361477	2018-08-07	1.1.2.35.3832.5318.11358	Indonesia	Asia	South-eastern Asia
SRR7457892	2018-06-20	1.1.2.4.3525.4785.10154	Indonesia	Asia	South-eastern Asia
SRR6922515	2017-04-05	1.1.226.1027.1668.3704.7145	Indonesia	Asia	South-eastern Asia
SRR8717173	2015-08-12	1.1.99.172.1796.2126.3300	Indonesia	Asia	South-eastern Asia
SRR6919716	2017-10-11	4.125.670.2360.3224.4190.8650	Indonesia	Asia	South-eastern Asia
SRR1952912	2014-10-14	1.1.2.2069.368.369.617	Italy	Europe	Southern Europe
SRR6919765	2016-08-02	1.1.2.28.2281.2830.5112	Italy	Europe	Southern Europe
SRR6924105	2016-06-15	1.1.2.313.313.1470.4832	Italy	Europe	Southern Europe
SRR4063740	2015-07-08	1.2.3.18.1747.2052.3117	Italy	Europe	Southern Europe
SRR5216576	2016-10-28	1.2.3.18.175.175.6133	Italy	Europe	Southern Europe
SRR6900985	2017-09-19	1.2.3.18.175.175.8436	Italy	Europe	Southern Europe
SRR6918527	2017-09-26	1.2.3.18.175.175.8491	Italy	Europe	Southern Europe
SRR8492291	2018-06-07	1.2.3.18.180.180.10985	Italy	Europe	Southern Europe
SRR6897019	2017-06-06	1.2.3.18.180.180.11098	Italy	Europe	Southern Europe
SRR8293798	2018-09-05	1.2.3.18.180.180.11639	Italy	Europe	Southern Europe
SRR8293774	2018-09-04	1.2.3.18.1836.5419.11640	Italy	Europe	Southern Europe
SRR6922495	2017-09-27	1.2.3.18.455.4150.8511	Italy	Europe	Southern Europe
SRR5216517	2015-08-21	3.4.49.1113.1844.2189.3443	Italy	Europe	Southern Europe
SRR8333801	2018-08-15	1.2.3.18.180.180.11457	Jamaica	Americas	Latin America and the Caribbean
SRR1967222	2014-07-08	1.5.11.13.13.13.1032	Jamaica	Americas	Latin America and the Caribbean
SRR7533376	2018-07-03	1.5.11.13.13.13.10364	Jamaica	Americas	Latin America and the Caribbean
SRR7841506	2018-07-13	1.5.11.13.13.13.10432	Jamaica	Americas	Latin America and the Caribbean
SRR1959498	2014-10-23	1.5.11.13.13.13.1322	Jamaica	Americas	Latin America and the Caribbean
SRR5215733	2016-09-13	1.5.11.13.13.13.1872	Jamaica	Americas	Latin America and the Caribbean
SRR1968827	2015-03-05	1.5.11.13.13.13.2608	Jamaica	Americas	Latin America and the Caribbean
SRR7237453	2015-07-16	1.5.11.13.13.13.3109	Jamaica	Americas	Latin America and the Caribbean
SRR6901020	2016-07-21	1.5.11.13.13.13.5007	Jamaica	Americas	Latin America and the Caribbean
SRR5194172	2016-10-17	1.5.11.13.13.13.5962	Jamaica	Americas	Latin America and the Caribbean
SRR5633183	2017-01-23	1.5.11.13.13.13.6902	Jamaica	Americas	Latin America and the Caribbean
SRR7890247	2018-02-01	1.5.11.13.13.13.9346	Jamaica	Americas	Latin America and the Caribbean
SRR8509106	2018-04-11	1.5.11.13.13.13.9427	Jamaica	Americas	Latin America and the Caribbean
SRR6901050	2017-08-31	1.5.11.13.13.13.9594	Jamaica	Americas	Latin America and the Caribbean
SRR7410304	2018-03-27	1.5.11.13.13.13.9787	Jamaica	Americas	Latin America and the Caribbean
SRR7414404	2018-04-23	1.5.11.13.13.13.9846	Jamaica	Americas	Latin America and the Caribbean
SRR1958571	2014-10-31	1.5.11.13.130.130.1276	Jamaica	Americas	Latin America and the Caribbean
SRR3049698	2014-05-30	1.5.11.13.130.130.911	Jamaica	Americas	Latin America and the Caribbean
SRR3048722	2014-06-16	1.5.11.13.333.333.1455	Jamaica	Americas	Latin America and the Caribbean
SRR3049742	2014-06-06	1.5.11.13.333.333.376	Jamaica	Americas	Latin America and the Caribbean
SRR5193131	2016-06-02	1.5.11.13.333.991.4763	Jamaica	Americas	Latin America and the Caribbean
SRR6898461	2017-03-06	1.5.11.13.333.991.7041	Jamaica	Americas	Latin America and the Caribbean
SRR5632019	2017-03-07	1.5.11.13.333.991.7050	Jamaica	Americas	Latin America and the Caribbean
SRR6899500	2017-05-16	1.5.11.13.333.991.7302	Jamaica	Americas	Latin America and the Caribbean
SRR7879668	2018-08-31	1.5.11.2554.3864.5394.11560	Jamaica	Americas	Latin America and the Caribbean
SRR5215544	2015-11-23	1.5.61.92.92.92.4151	Jamaica	Americas	Latin America and the Caribbean
SRR5220418	2015-08-04	1.5.79.1029.1784.2106.3251	Jamaica	Americas	Latin America and the Caribbean
SRR6922513	2017-12-01	1.5.79.1857.3270.4294.8967	Jamaica	Americas	Latin America and the Caribbean
SRR1967178	2014-11-04	1.1.2.216.216.216.216	Kenya	Africa	Sub-Saharan Africa
SRR1966781	2015-02-16	1.1.2.249.1596.1841.2571	Kenya	Africa	Sub-Saharan Africa
SRR1966972	2015-01-28	1.1.2.249.1596.1841.2671	Kenya	Africa	Sub-Saharan Africa
SRR8499343	2019-01-09	1.1.2.2666.4079.5776.12637	Kenya	Africa	Sub-Saharan Africa
SRR6921944	2017-08-16	1.1.2.28.3135.4037.8142	Kenya	Africa	Sub-Saharan Africa
SRR6897048	2017-10-05	1.2.3.18.3219.4180.8597	Kenya	Africa	Sub-Saharan Africa
SRR8504934	2018-03-21	1.2.3.18.3256.4252.9740	Kenya	Africa	Sub-Saharan Africa
SRR8097936	2018-10-09	1.2.3.18.3256.5644.12128	Kenya	Africa	Sub-Saharan Africa
SRR5193300	2016-02-09	1.2.3.18.365.1854.4417	Kenya	Africa	Sub-Saharan Africa
SRR5193056	2016-03-10	1.2.3.18.365.2545.4503	Kenya	Africa	Sub-Saharan Africa
SRR4063733	2016-03-02	1.2.3.18.365.2591.4461	Kenya	Africa	Sub-Saharan Africa
SRR5216153	2016-03-08	1.2.3.18.365.2598.4495	Kenya	Africa	Sub-Saharan Africa
SRR5194164	2016-04-21	1.2.3.18.365.2646.4594	Kenya	Africa	Sub-Saharan Africa
SRR5216523	2016-04-18	1.2.3.18.365.2646.4602	Kenya	Africa	Sub-Saharan Africa
SRR5193047	2016-08-23	1.2.3.18.365.2890.5271	Kenya	Africa	Sub-Saharan Africa
SRR7538796	2018-06-29	1.2.3.18.365.3680.10311	Kenya	Africa	Sub-Saharan Africa
SRR8366142	2018-12-11	1.2.3.18.365.384.12550	Kenya	Africa	Sub-Saharan Africa
SRR4063745	2015-04-30	1.2.3.18.365.384.2769	Kenya	Africa	Sub-Saharan Africa
SRR1963280	2014-10-23	1.2.3.18.365.384.391	Kenya	Africa	Sub-Saharan Africa
SRR1967682	2015-02-17	1.2.3.18.365.384.475	Kenya	Africa	Sub-Saharan Africa
SRR1967747	2014-05-07	1.2.3.18.365.384.622	Kenya	Africa	Sub-Saharan Africa
SRR8524502	2018-01-18	1.2.3.18.365.384.9283	Kenya	Africa	Sub-Saharan Africa
SRR8499356	2018-05-01	1.2.3.18.365.384.9885	Kenya	Africa	Sub-Saharan Africa
SRR6898380	2017-11-27	1.2.3.18.365.4278.8927	Kenya	Africa	Sub-Saharan Africa
SRR8503747	2018-04-04	1.2.3.18.365.4660.9778	Kenya	Africa	Sub-Saharan Africa
SRR5216492	2016-02-11	1.2.3.18.365.543.4421	Kenya	Africa	Sub-Saharan Africa
SRR8735126	2019-02-26	1.2.3.18.365.5842.12799	Kenya	Africa	Sub-Saharan Africa
SRR8754453	2019-03-08	1.2.3.18.365.5847.12815	Kenya	Africa	Sub-Saharan Africa
SRR8717212	2019-02-27	1.2.3.18.4049.5718.12787	Kenya	Africa	Sub-Saharan Africa
SRR5193277	2016-11-08	1.1.2.80.349.1012.6248	China	Asia	Eastern Asia
SRR5216527	2016-10-28	1.1.2.80.80.80.6128	China	Asia	Eastern Asia
SRR8711780	2015-11-05	1.1.185.1185.2011.2418.3987	Malaysia	Asia	South-eastern Asia
SRR5215538	2015-08-25	1.1.2.1094.1816.2152.3353	Malaysia	Asia	South-eastern Asia
SRR5583891	2017-04-11	1.1.2.1094.2516.3706.7148	Malaysia	Asia	South-eastern Asia
SRR6900936	2016-09-06	1.1.2.1690.2443.3045.5530	Malaysia	Asia	South-eastern Asia
SRR6898400	2016-03-31	1.1.2.206.1728.2022.4550	Malaysia	Asia	South-eastern Asia
SRR6921946	2017-05-03	1.1.2.206.1980.3725.7216	Malaysia	Asia	South-eastern Asia
SRR5193720	2016-07-05	1.1.2.206.2240.2770.4930	Malaysia	Asia	South-eastern Asia
SRR6900307	2017-05-03	1.1.2.206.2960.3739.7250	Malaysia	Asia	South-eastern Asia
SRR6922109	2017-02-02	1.1.2.206.508.3595.6921	Malaysia	Asia	South-eastern Asia
SRR1969665	2014-12-05	1.1.2.206.508.529.603	Malaysia	Asia	South-eastern Asia
SRR6900362	2017-09-29	1.1.2.206.508.529.8527	Malaysia	Asia	South-eastern Asia
SRR1968949	2014-05-16	1.1.2.206.939.1054.1390	Malaysia	Asia	South-eastern Asia
SRR7533390	2017-12-12	1.1.2.2381.3287.4319.9020	Malaysia	Asia	South-eastern Asia
SRR5194233	2016-09-02	1.1.2.28.2255.2793.5450	Malaysia	Asia	South-eastern Asia
SRR6920562	2017-09-14	1.1.2.28.3180.4108.8390	Malaysia	Asia	South-eastern Asia
SRR7841571	2018-08-13	1.1.2.30.2558.3211.11412	Malaysia	Asia	South-eastern Asia
SRR8503771	2018-04-05	1.1.2.4.3525.4657.9767	Malaysia	Asia	South-eastern Asia
SRR8503649	2018-04-09	1.1.2.4.3525.4662.9783	Malaysia	Asia	South-eastern Asia
SRR7867042	2018-07-24	1.1.2.4.3635.4879.10516	Malaysia	Asia	South-eastern Asia
SRR1970240	2015-03-26	1.1.2.4.4.1909.2688	Malaysia	Asia	South-eastern Asia
SRR5220846	2015-11-04	1.1.2.4.4.2384.4000	Malaysia	Asia	South-eastern Asia
SRR8272295	2018-11-13	1.1.2.4.4.5320.11362	Malaysia	Asia	South-eastern Asia
SRR8401399	2018-12-20	1.1.2.4.4.5755.12589	Malaysia	Asia	South-eastern Asia
SRR1966804	2014-06-18	1.1.2.44.44.44.44	Malaysia	Asia	South-eastern Asia
SRR6897651	2017-09-06	1.1.200.491.2948.3718.8312	Malaysia	Asia	South-eastern Asia
SRR6920005	2017-01-24	1.1.226.1700.2840.3588.6890	Malaysia	Asia	South-eastern Asia
SRR8509131	2018-03-16	1.1.226.2505.3509.4627.9712	Malaysia	Asia	South-eastern Asia
SRR9287742	2019-04-17	1.1.226.2681.4122.5896.12979	Malaysia	Asia	South-eastern Asia
SRR7962116	2018-09-14	4.111.631.2564.3888.5442.11732	Malaysia	Asia	South-eastern Asia
SRR1969696	2014-09-09	1.1.2.138.138.138.138	Malta	Europe	Southern Europe
SRR8166151	2018-09-11	1.1.2.2073.3883.5430.11688	Malta	Europe	Southern Europe
SRR1966179	2014-10-21	1.1.2.210.210.210.210	Malta	Europe	Southern Europe
SRR3286605	2015-04-16	1.1.2.229.229.229.1804	Malta	Europe	Southern Europe
SRR8492317	2018-06-05	1.1.2.229.3578.4757.10078	Malta	Europe	Southern Europe
SRR8300441	2018-08-30	1.2.3.18.180.180.11577	Malta	Europe	Southern Europe
SRR7962258	2018-08-21	1.2.3.18.183.183.11448	Malta	Europe	Southern Europe
SRR8489346	2019-01-14	1.2.3.18.183.183.12649	Malta	Europe	Southern Europe
SRR1963285	2014-12-31	1.2.3.18.183.183.183	Malta	Europe	Southern Europe
SRR5193751	2015-06-29	1.2.3.18.183.183.3005	Malta	Europe	Southern Europe
SRR7348943	2015-09-14	1.2.3.18.183.183.3454	Malta	Europe	Southern Europe
SRR5193807	2015-10-22	1.2.3.18.183.183.3902	Malta	Europe	Southern Europe
SRR7516698	2015-12-01	1.2.3.18.183.183.4157	Malta	Europe	Southern Europe
SRR5193544	2016-02-10	1.2.3.18.183.183.4414	Malta	Europe	Southern Europe
SRR6900486	2016-02-15	1.2.3.18.183.183.4422	Malta	Europe	Southern Europe
SRR5215503	2016-04-15	1.2.3.18.183.183.4579	Malta	Europe	Southern Europe
SRR5193070	2016-04-13	1.2.3.18.183.183.4581	Malta	Europe	Southern Europe
SRR5194125	2016-04-19	1.2.3.18.183.183.4590	Malta	Europe	Southern Europe
SRR6900356	2016-04-26	1.2.3.18.183.183.4614	Malta	Europe	Southern Europe
SRR5215648	2016-04-28	1.2.3.18.183.183.4630	Malta	Europe	Southern Europe
SRR5215726	2016-05-17	1.2.3.18.183.183.4681	Malta	Europe	Southern Europe
SRR5194146	2016-08-31	1.2.3.18.183.183.5306	Malta	Europe	Southern Europe
SRR6924051	2017-08-03	1.2.3.18.183.183.7918	Malta	Europe	Southern Europe
SRR8509046	2018-03-15	1.2.3.18.183.183.9713	Malta	Europe	Southern Europe
SRR6919322	2017-10-10	1.2.3.18.183.4178.8593	Malta	Europe	Southern Europe
SRR9287472	2019-04-09	1.2.3.18.211.211.12956	Malta	Europe	Southern Europe
SRR1958089	2014-09-23	1.2.3.18.408.415.434	Malta	Europe	Southern Europe
SRR1963439	2014-12-24	1.2.3.18.408.616.738	Malta	Europe	Southern Europe
SRR3585355	2015-10-23	1.1.2.1177.1995.2391.3912	Mexico	Americas	Latin America and the Caribbean
SRR7495739	2015-10-29	1.1.2.1182.2007.2412.3976	Mexico	Americas	Latin America and the Caribbean
SRR6919304	2017-09-06	1.1.2.1182.3168.4091.8342	Mexico	Americas	Latin America and the Caribbean
SRR5193116	2016-03-02	1.1.2.12.12.590.3896	Mexico	Americas	Latin America and the Caribbean
SRR7465049	2015-04-28	1.1.2.80.349.1012.2768	Mexico	Americas	Latin America and the Caribbean
SRR1965636	2015-03-27	1.1.204.580.786.862.1101	Mexico	Americas	Latin America and the Caribbean
SRR3286863	2015-06-15	1.1.237.1051.1716.2001.2940	Mexico	Americas	Latin America and the Caribbean
SRR5193245	2016-02-11	1.1.333.103.103.2090.4416	Mexico	Americas	Latin America and the Caribbean
SRR7275014	2018-05-23	1.1.333.103.103.2119.10014	Mexico	Americas	Latin America and the Caribbean
SRR6900640	2016-05-03	1.1.333.103.103.2119.4731	Mexico	Americas	Latin America and the Caribbean
SRR6900341	2017-03-28	1.1.333.103.103.2119.7106	Mexico	Americas	Latin America and the Caribbean
SRR6897949	2017-05-09	1.1.333.103.103.2119.7289	Mexico	Americas	Latin America and the Caribbean
SRR6924127	2017-09-28	1.1.333.103.103.2119.8530	Mexico	Americas	Latin America and the Caribbean
SRR8524667	2017-11-15	1.1.333.103.103.2119.9016	Mexico	Americas	Latin America and the Caribbean
SRR6897821	2017-12-15	1.1.333.103.103.2119.9038	Mexico	Americas	Latin America and the Caribbean
SRR7456781	2018-02-14	1.1.333.103.103.2119.9479	Mexico	Americas	Latin America and the Caribbean
SRR7204609	2018-04-05	1.1.333.103.103.2119.9766	Mexico	Americas	Latin America and the Caribbean
SRR7495458	2018-04-20	1.1.333.103.103.2119.9847	Mexico	Americas	Latin America and the Caribbean
SRR6900084	2017-09-26	1.1.333.103.103.4147.8503	Mexico	Americas	Latin America and the Caribbean
SRR7350602	2018-04-13	1.1.333.103.103.4682.9818	Mexico	Americas	Latin America and the Caribbean
SRR7439504	2018-06-14	1.1.333.103.103.4777.10125	Mexico	Americas	Latin America and the Caribbean
SRR1966216	2014-07-08	1.1.333.103.103.548.1391	Mexico	Americas	Latin America and the Caribbean
SRR1965348	2014-08-04	1.1.333.103.103.548.1738	Mexico	Americas	Latin America and the Caribbean
SRR1966970	2015-02-03	1.1.333.103.103.548.1813	Mexico	Americas	Latin America and the Caribbean
SRR1960181	2014-12-09	1.1.333.103.103.548.2165	Mexico	Americas	Latin America and the Caribbean
SRR1966236	2014-08-01	1.1.333.103.103.548.2639	Mexico	Americas	Latin America and the Caribbean
SRR1968641	2015-01-29	1.1.333.103.103.548.2648	Mexico	Americas	Latin America and the Caribbean
SRR3286852	2015-06-09	1.1.333.103.103.548.2917	Mexico	Americas	Latin America and the Caribbean
SRR7469064	2015-06-16	1.1.333.103.103.548.2943	Mexico	Americas	Latin America and the Caribbean
SRR3286930	2015-06-18	1.1.333.103.103.548.2968	Mexico	Americas	Latin America and the Caribbean
SRR3284840	2015-09-23	1.1.333.103.103.548.3600	Mexico	Americas	Latin America and the Caribbean
SRR5193896	2015-09-15	1.1.333.103.103.548.3617	Mexico	Americas	Latin America and the Caribbean
SRR5220460	2015-09-23	1.1.333.103.103.548.3632	Mexico	Americas	Latin America and the Caribbean
SRR7426628	2015-10-07	1.1.333.103.103.548.3720	Mexico	Americas	Latin America and the Caribbean
SRR5220888	2015-10-08	1.1.333.103.103.548.3793	Mexico	Americas	Latin America and the Caribbean
SRR5193303	2015-10-14	1.1.333.103.103.548.3823	Mexico	Americas	Latin America and the Caribbean
SRR5193389	2015-10-16	1.1.333.103.103.548.3828	Mexico	Americas	Latin America and the Caribbean
SRR5215512	2015-10-20	1.1.333.103.103.548.3871	Mexico	Americas	Latin America and the Caribbean
SRR8704853	2015-12-02	1.1.333.103.103.548.4121	Mexico	Americas	Latin America and the Caribbean
SRR5194034	2015-12-31	1.1.333.103.103.548.4239	Mexico	Americas	Latin America and the Caribbean
SRR5193814	2016-02-05	1.1.333.103.103.548.4407	Mexico	Americas	Latin America and the Caribbean
SRR5216562	2016-03-03	1.1.333.103.103.548.4481	Mexico	Americas	Latin America and the Caribbean
SRR5194137	2016-04-11	1.1.333.103.103.548.4577	Mexico	Americas	Latin America and the Caribbean
SRR7122569	2016-06-07	1.1.333.103.103.548.4815	Mexico	Americas	Latin America and the Caribbean
SRR5194318	2016-07-12	1.1.333.103.103.548.4980	Mexico	Americas	Latin America and the Caribbean
SRR5193620	2016-07-25	1.1.333.103.103.548.5035	Mexico	Americas	Latin America and the Caribbean
SRR3286685	2015-05-12	1.1.333.103.103.548.5188	Mexico	Americas	Latin America and the Caribbean
SRR6919816	2016-09-01	1.1.333.103.103.548.5415	Mexico	Americas	Latin America and the Caribbean
SRR5220699	2016-09-14	1.1.333.103.103.548.5600	Mexico	Americas	Latin America and the Caribbean
SRR5193787	2016-09-23	1.1.333.103.103.548.5744	Mexico	Americas	Latin America and the Caribbean
SRR6900181	2016-09-20	1.1.333.103.103.548.5757	Mexico	Americas	Latin America and the Caribbean
SRR6922558	2016-10-04	1.1.333.103.103.548.5878	Mexico	Americas	Latin America and the Caribbean
SRR7351319	2015-04-01	1.1.333.103.103.548.637	Mexico	Americas	Latin America and the Caribbean
SRR5632726	2017-04-24	1.1.333.103.103.548.7204	Mexico	Americas	Latin America and the Caribbean
SRR6919918	2017-05-15	1.1.333.103.103.548.7296	Mexico	Americas	Latin America and the Caribbean
SRR6922073	2017-08-18	1.1.333.103.103.548.8186	Mexico	Americas	Latin America and the Caribbean
SRR7163836	2018-01-04	1.1.333.103.103.548.9181	Mexico	Americas	Latin America and the Caribbean
SRR8137395	2018-10-17	1.1.333.103.103.5669.12230	Mexico	Americas	Latin America and the Caribbean
SRR1966960	2015-02-26	1.1.333.103.103.670.1058	Mexico	Americas	Latin America and the Caribbean
SRR7998240	2018-09-26	1.1.333.103.103.670.11844	Mexico	Americas	Latin America and the Caribbean
SRR8731025	2015-05-28	1.1.333.103.103.670.2850	Mexico	Americas	Latin America and the Caribbean
SRR7349202	2015-06-09	1.1.333.103.103.670.2906	Mexico	Americas	Latin America and the Caribbean
SRR8705999	2015-10-05	1.1.333.103.103.670.3717	Mexico	Americas	Latin America and the Caribbean
SRR6900342	2016-05-04	1.1.333.103.103.670.4652	Mexico	Americas	Latin America and the Caribbean
SRR6922090	2016-06-30	1.1.333.103.103.670.4904	Mexico	Americas	Latin America and the Caribbean
SRR6918882	2016-09-07	1.1.333.103.103.670.5546	Mexico	Americas	Latin America and the Caribbean
SRR6922075	2016-10-05	1.1.333.103.103.670.5882	Mexico	Americas	Latin America and the Caribbean
SRR5193925	2016-11-29	1.1.333.103.103.670.5940	Mexico	Americas	Latin America and the Caribbean
SRR5220696	2016-12-16	1.1.333.103.103.670.6523	Mexico	Americas	Latin America and the Caribbean
SRR6900311	2017-05-02	1.1.333.103.103.670.7217	Mexico	Americas	Latin America and the Caribbean
SRR6898867	2017-06-13	1.1.333.103.103.670.7538	Mexico	Americas	Latin America and the Caribbean
SRR7458549	2018-02-14	1.1.333.103.103.670.9474	Mexico	Americas	Latin America and the Caribbean
SRR7216057	2018-03-08	1.1.333.103.103.670.9684	Mexico	Americas	Latin America and the Caribbean
SRR3285386	2015-10-23	1.1.333.103.1992.2387.3906	Mexico	Americas	Latin America and the Caribbean
SRR6919279	2016-07-21	1.1.333.103.1992.2387.5002	Mexico	Americas	Latin America and the Caribbean
SRR5215808	2016-09-23	1.1.333.103.1992.2387.5788	Mexico	Americas	Latin America and the Caribbean
SRR6920106	2016-09-22	1.1.333.103.1992.2387.5790	Mexico	Americas	Latin America and the Caribbean
SRR6901088	2017-05-15	1.1.333.103.1992.2387.7292	Mexico	Americas	Latin America and the Caribbean
SRR6898885	2016-06-27	1.1.333.103.1992.2757.4891	Mexico	Americas	Latin America and the Caribbean
SRR5220664	2017-01-11	1.1.333.103.1992.2757.6854	Mexico	Americas	Latin America and the Caribbean
SRR5193656	2016-10-27	1.1.333.103.2561.3217.6126	Mexico	Americas	Latin America and the Caribbean
SRR6900868	2017-05-23	1.1.333.103.2977.3770.7334	Mexico	Americas	Latin America and the Caribbean
SRR8087208	2018-10-08	1.1.333.103.4016.5636.12091	Mexico	Americas	Latin America and the Caribbean
SRR6898847	2017-09-28	1.1.669.2356.3206.4160.8539	Mexico	Americas	Latin America and the Caribbean
SRR5633347	2017-04-24	1.2.3.18.2950.3720.7211	Mexico	Americas	Latin America and the Caribbean
SRR7343913	2015-09-04	1.1.2.1023.1657.2192.3447	Morocco	Africa	Northern Africa
SRR8503796	2018-05-03	1.1.2.12.12.590.9897	Morocco	Africa	Northern Africa
SRR1962286	2014-12-31	1.1.2.150.1196.1357.1837	Morocco	Africa	Northern Africa
SRR1958651	2014-09-12	1.1.2.150.150.150.150	Morocco	Africa	Northern Africa
SRR6919751	2016-11-16	1.1.2.1886.2604.3278.6278	Morocco	Africa	Northern Africa
SRR7358931	2015-11-17	1.1.2.27.27.2456.4075	Morocco	Africa	Northern Africa
SRR1968172	2014-06-19	1.1.2.27.27.27.27	Morocco	Africa	Northern Africa
SRR8706113	2015-10-01	1.1.2.61.61.561.3653	Morocco	Africa	Northern Africa
SRR5193140	2016-04-27	1.1.2.80.2167.2650.4611	Morocco	Africa	Northern Africa
SRR7885280	2018-08-21	1.1.2.80.2167.3333.11449	Morocco	Africa	Northern Africa
SRR6898011	2017-11-01	1.1.2.80.2167.3333.8768	Morocco	Africa	Northern Africa
SRR6897044	2017-04-05	1.1.2.80.2942.3705.7147	Morocco	Africa	Northern Africa
SRR6899269	2017-04-12	1.1.2.80.2942.3705.7182	Morocco	Africa	Northern Africa
SRR3286624	2015-04-20	1.1.2.80.349.1012.2676	Morocco	Africa	Northern Africa
SRR7538384	2015-04-28	1.1.2.80.349.1012.2768	Morocco	Africa	Northern Africa
SRR5194294	2016-04-14	1.1.2.80.349.1012.4596	Morocco	Africa	Northern Africa
SRR5193731	2016-04-14	1.1.2.80.349.1012.4597	Morocco	Africa	Northern Africa
SRR6922066	2016-04-19	1.1.2.80.349.1012.4604	Morocco	Africa	Northern Africa
SRR5193482	2016-08-24	1.1.2.80.349.1012.5208	Morocco	Africa	Northern Africa
SRR8549079	2017-08-15	1.1.2.80.349.1012.5795	Morocco	Africa	Northern Africa
SRR5220631	2016-09-27	1.1.2.80.349.1012.5798	Morocco	Africa	Northern Africa
SRR5220671	2016-09-26	1.1.2.80.349.1012.5817	Morocco	Africa	Northern Africa
SRR5193538	2016-10-04	1.1.2.80.349.1012.5870	Morocco	Africa	Northern Africa
SRR5194176	2016-10-11	1.1.2.80.349.1012.5919	Morocco	Africa	Northern Africa
SRR6900118	2017-10-10	1.1.2.80.349.1012.8606	Morocco	Africa	Northern Africa
SRR6920171	2017-10-30	1.1.2.80.349.1012.8756	Morocco	Africa	Northern Africa
SRR6922664	2017-10-30	1.1.2.80.349.1012.8762	Morocco	Africa	Northern Africa
SRR7495741	2017-12-05	1.1.2.80.349.1012.8979	Morocco	Africa	Northern Africa
SRR7090673	2018-04-19	1.1.2.80.349.1012.9839	Morocco	Africa	Northern Africa
SRR7495456	2018-05-01	1.1.2.80.349.1012.9887	Morocco	Africa	Northern Africa
SRR8509200	2019-01-17	1.1.2.80.349.2639.12657	Morocco	Africa	Northern Africa
SRR8142771	2018-10-18	1.1.2.80.349.4328.12228	Morocco	Africa	Northern Africa
SRR7890380	2018-08-31	1.1.2.80.3560.4725.11558	Morocco	Africa	Northern Africa
SRR6918651	2017-10-16	1.1.2.80.728.4192.8655	Morocco	Africa	Northern Africa
SRR1963528	2014-10-27	1.1.2.80.728.792.1742	Morocco	Africa	Northern Africa
SRR1963335	2014-11-13	1.1.2.80.80.80.2035	Morocco	Africa	Northern Africa
SRR3049307	2014-06-09	1.1.2.80.833.921.1183	Morocco	Africa	Northern Africa
SRR8503748	2018-03-20	1.1.333.103.103.2119.9727	Morocco	Africa	Northern Africa
SRR5215638	2016-07-26	1.2.3.151.151.783.5031	Morocco	Africa	Northern Africa
SRR5194297	2016-07-11	1.2.3.151.362.363.4934	Morocco	Africa	Northern Africa
SRR8116993	2018-10-16	1.2.3.18.180.180.12194	Morocco	Africa	Northern Africa
SRR8839538	2019-03-21	1.2.3.18.2950.3720.12871	Morocco	Africa	Northern Africa
SRR8878999	2019-03-26	1.2.3.18.2950.3720.12888	Morocco	Africa	Northern Africa
SRR6919302	2017-04-24	1.2.3.18.2950.3720.7203	Morocco	Africa	Northern Africa
SRR6898008	2017-10-25	1.2.3.18.2950.3720.8742	Morocco	Africa	Northern Africa
SRR8717069	2015-08-06	1.1.127.233.1785.2109.3263	Pakistan	Asia	Southern Asia
SRR5220674	2016-11-15	1.1.127.233.2608.3286.6299	Pakistan	Asia	Southern Asia
SRR3286718	2015-05-28	1.1.2.147.1047.1962.2852	Pakistan	Asia	Southern Asia
SRR7516241	2017-07-13	1.1.2.147.1047.2286.7756	Pakistan	Asia	Southern Asia
SRR6898938	2017-01-17	1.1.2.147.1047.3586.6885	Pakistan	Asia	Southern Asia
SRR6897795	2017-11-29	1.1.2.147.1047.4285.8941	Pakistan	Asia	Southern Asia
SRR6324230	2015-04-15	1.1.2.147.855.951.1221	Pakistan	Asia	Southern Asia
SRR5216334	2016-09-13	1.1.2.28.2471.3082.5659	Pakistan	Asia	Southern Asia
SRR6918616	2016-10-04	1.1.2.504.2340.2914.5876	Pakistan	Asia	Southern Asia
SRR5220203	2015-09-17	1.2.3.151.151.783.2809	Pakistan	Asia	Southern Asia
SRR8711352	2015-09-16	1.1.2.1132.1880.2241.3559	Poland	Europe	Eastern Europe
SRR8385673	2018-12-19	1.1.2.12.12.12.12585	Poland	Europe	Eastern Europe
SRR8936125	2019-04-01	1.1.2.12.12.12.12910	Poland	Europe	Eastern Europe
SRR3049635	2014-08-21	1.1.2.12.12.12.2106	Poland	Europe	Eastern Europe
SRR1958144	2014-07-10	1.1.2.12.12.12.496	Poland	Europe	Eastern Europe
SRR6899359	2017-08-31	1.1.2.12.12.12.7700	Poland	Europe	Eastern Europe
SRR7465069	2018-06-12	1.1.2.12.12.12.8795	Poland	Europe	Eastern Europe
SRR6918540	2017-04-04	1.1.2.12.12.2681.7138	Poland	Europe	Eastern Europe
SRR6900483	2017-05-25	1.1.2.12.12.3778.7365	Poland	Europe	Eastern Europe
SRR6918646	2017-10-10	1.1.2.12.12.4185.8627	Poland	Europe	Eastern Europe
SRR8484201	2018-08-29	1.1.2.12.12.590.11526	Poland	Europe	Eastern Europe
SRR7997119	2018-09-17	1.1.2.12.12.590.11753	Poland	Europe	Eastern Europe
SRR8717226	2015-09-03	1.1.2.12.12.590.3413	Poland	Europe	Eastern Europe
SRR5193887	2016-09-14	1.1.2.12.12.590.3988	Poland	Europe	Eastern Europe
SRR7458149	2018-04-04	1.1.2.12.12.590.9773	Poland	Europe	Eastern Europe
SRR8293834	2018-09-04	1.1.2.12.12.590.9897	Poland	Europe	Eastern Europe
SRR6898868	2016-09-12	1.1.2.12.12.890.5626	Poland	Europe	Eastern Europe
SRR7230717	2015-09-11	1.1.2.12.421.2201.4263	Poland	Europe	Eastern Europe
SRR6922080	2017-08-02	1.1.2.12.421.3957.7825	Poland	Europe	Eastern Europe
SRR6922721	2015-12-30	1.1.2.12.421.429.4225	Poland	Europe	Eastern Europe
SRR3049013	2014-07-16	1.1.2.127.127.1273.2151	Poland	Europe	Eastern Europe
SRR8958155	2019-04-08	1.1.2.1293.2392.5478.12939	Poland	Europe	Eastern Europe
SRR5220966	2015-11-12	1.1.2.152.152.2430.4020	Poland	Europe	Eastern Europe
SRR5216195	2016-10-27	1.1.2.26.26.3220.6136	Poland	Europe	Eastern Europe
SRR1959269	2014-09-19	1.1.2.265.265.265.265	Poland	Europe	Eastern Europe
SRR6924056	2017-09-04	1.1.2.265.265.265.8264	Poland	Europe	Eastern Europe
SRR6900824	2016-04-19	1.1.2.28.195.195.4593	Poland	Europe	Eastern Europe
SRR5194338	2015-09-18	1.1.2.28.195.358.3453	Poland	Europe	Eastern Europe
SRR1958262	2014-10-14	1.1.2.28.195.358.360	Poland	Europe	Eastern Europe
SRR5216569	2015-11-10	1.1.2.28.195.358.4034	Poland	Europe	Eastern Europe
SRR5193497	2016-09-15	1.1.2.28.195.358.5686	Poland	Europe	Eastern Europe
SRR6900863	2017-07-03	1.1.2.28.195.3922.7693	Poland	Europe	Eastern Europe
SRR5216435	2015-11-23	1.1.2.28.2034.2460.4086	Poland	Europe	Eastern Europe
SRR6899403	2017-06-16	1.1.658.2313.3082.3923.7696	Poland	Europe	Eastern Europe
SRR3286856	2015-06-17	1.2.3.18.1691.1961.2954	Poland	Europe	Eastern Europe
SRR5216439	2016-04-26	1.2.3.18.175.1305.4621	Poland	Europe	Eastern Europe
SRR8490776	2018-08-30	1.2.3.18.175.175.11564	Poland	Europe	Eastern Europe
SRR6898818	2016-07-26	1.2.3.18.175.175.5018	Poland	Europe	Eastern Europe
SRR5216426	2017-01-05	1.2.3.18.175.175.6842	Poland	Europe	Eastern Europe
SRR7480620	2018-06-12	1.2.3.18.175.175.9937	Poland	Europe	Eastern Europe
SRR6922674	2017-04-04	1.2.3.18.175.2769.7131	Poland	Europe	Eastern Europe
SRR8503953	2018-04-04	1.2.3.18.180.180.10861	Poland	Europe	Eastern Europe
SRR5216266	2016-09-13	1.2.3.18.180.180.11246	Poland	Europe	Eastern Europe
SRR7998226	2018-09-13	1.2.3.18.180.180.11711	Poland	Europe	Eastern Europe
SRR6900941	2017-09-25	1.2.3.18.180.5091.11123	Poland	Europe	Eastern Europe
SRR6900699	2016-09-15	1.2.3.18.180.5120.10980	Poland	Europe	Eastern Europe
SRR6922695	2017-08-08	1.2.3.18.180.5238.11170	Poland	Europe	Eastern Europe
SRR7867150	2018-08-31	1.2.3.18.180.5402.11564	Poland	Europe	Eastern Europe
SRR4063713	2015-09-11	1.2.3.18.1895.2261.4287	Poland	Europe	Eastern Europe
SRR8382004	2018-07-17	1.2.3.18.3626.4855.10443	Poland	Europe	Eastern Europe
SRR7286763	2015-09-01	1.2.3.18.3698.5090.11222	Poland	Europe	Eastern Europe
SRR3286629	2015-05-08	1.2.3.18.3698.5100.10870	Poland	Europe	Eastern Europe
SRR6924135	2016-08-24	1.2.3.18.3698.5100.10882	Poland	Europe	Eastern Europe
SRR3286944	2015-06-30	1.2.3.18.458.472.3037	Poland	Europe	Eastern Europe
SRR5193031	2015-07-08	1.2.3.18.458.472.3082	Poland	Europe	Eastern Europe
SRR5194231	2015-07-08	1.2.3.18.458.472.3110	Poland	Europe	Eastern Europe
SRR6922676	2016-07-07	1.2.3.18.458.472.4947	Poland	Europe	Eastern Europe
SRR4063704	2016-01-04	1.2.3.18.779.854.4238	Poland	Europe	Eastern Europe
SRR6922743	2017-07-07	1.2.3.18.816.896.7772	Poland	Europe	Eastern Europe
SRR4063712	2015-09-28	1.2.3.18.860.2248.3590	Poland	Europe	Eastern Europe
SRR7506914	2018-06-26	1.2.3.421.3577.4756.10216	Poland	Europe	Eastern Europe
SRR6919850	2017-06-13	1.1.2.1037.3028.3853.7552	Portugal	Europe	Southern Europe
SRR6900457	2017-11-14	1.1.2.1037.3028.3853.8874	Portugal	Europe	Southern Europe
SRR6920473	2017-06-26	1.1.2.1076.3075.3909.7650	Portugal	Europe	Southern Europe
SRR7538811	2018-07-05	1.1.2.12.421.4553.10336	Portugal	Europe	Southern Europe
SRR5215656	2016-06-02	1.1.2.1283.2203.2706.4759	Portugal	Europe	Southern Europe
SRR5631728	2017-04-26	1.1.2.1283.2203.3729.7225	Portugal	Europe	Southern Europe
SRR1969548	2014-08-27	1.1.2.131.456.1040.1377	Portugal	Europe	Southern Europe
SRR5220918	2015-11-10	1.1.2.1326.373.2419.3997	Portugal	Europe	Southern Europe
SRR7122587	2015-10-29	1.1.2.28.195.2087.3210	Portugal	Europe	Southern Europe
SRR1965366	2014-10-01	1.2.3.151.151.151.798	Portugal	Europe	Southern Europe
SRR1969684	2014-09-09	1.2.3.151.151.151.974	Portugal	Europe	Southern Europe
SRR7879555	2018-07-16	1.2.3.151.151.783.10410	Portugal	Europe	Southern Europe
SRR8711755	2015-09-28	1.2.3.151.151.783.2809	Portugal	Europe	Southern Europe
SRR5216418	2016-10-18	1.2.3.18.175.175.6033	Portugal	Europe	Southern Europe
SRR8137458	2018-10-19	1.2.3.18.180.180.10985	Portugal	Europe	Southern Europe
SRR6899303	2017-07-18	1.2.3.18.180.5093.10912	Portugal	Europe	Southern Europe
SRR7298410	2018-04-18	1.2.3.18.180.5093.11146	Portugal	Europe	Southern Europe
SRR7417282	2018-06-05	1.2.3.18.3101.3966.10085	Portugal	Europe	Southern Europe
SRR8293561	2018-09-10	1.2.3.18.3101.3966.11667	Portugal	Europe	Southern Europe
SRR5583250	2017-04-27	1.2.3.18.359.360.7159	Portugal	Europe	Southern Europe
SRR6897968	2017-06-15	1.2.3.18.359.360.7553	Portugal	Europe	Southern Europe
SRR6897974	2017-09-07	1.2.3.18.359.360.8308	Portugal	Europe	Southern Europe
SRR5216116	2016-09-15	1.2.3.203.2182.2671.4922	Portugal	Europe	Southern Europe
SRR5193912	2016-08-24	1.2.3.203.2182.2671.5203	Portugal	Europe	Southern Europe
SRR6901013	2017-07-14	1.21.92.248.248.4017.8095	Portugal	Europe	Southern Europe
SRR6900823	2017-09-07	1.5.159.280.280.280.8319	Portugal	Europe	Southern Europe
SRR5194118	2016-06-24	1.5.321.1298.2231.2760.4903	Portugal	Europe	Southern Europe
SRR5215793	2016-09-20	1.5.321.1298.2231.2760.5726	Portugal	Europe	Southern Europe
SRR7310322	2015-08-27	1.1.2.1107.1835.2175.3401	Russian federation	Europe	Eastern Europe
SRR7469039	2015-09-30	1.1.2.1151.1908.2278.3666	Russian federation	Europe	Eastern Europe
SRR1968370	2014-06-24	1.1.2.2073.834.922.1185	Russian federation	Europe	Eastern Europe
SRR6920538	2017-09-11	1.1.2.2342.3167.4090.8340	Russian federation	Europe	Eastern Europe
SRR7961932	2018-09-13	1.1.2.2562.3886.5436.11715	Russian federation	Europe	Eastern Europe
SRR1958142	2014-11-07	1.1.2.28.1428.1647.2265	Russian federation	Europe	Eastern Europe
SRR8380066	2018-07-18	1.1.2.28.1428.4865.10465	Russian federation	Europe	Eastern Europe
SRR1969359	2014-07-04	1.1.2.51.51.51.51	Russian federation	Europe	Eastern Europe
SRR5216384	2016-08-09	1.1.2.78.2277.2826.5108	Russian federation	Europe	Eastern Europe
SRR5220667	2016-06-21	1.1.320.1296.2225.2746.4865	Russian federation	Europe	Eastern Europe
SRR7850546	2018-07-20	1.1.320.1296.3634.4875.10506	Russian federation	Europe	Eastern Europe
SRR7351414	2015-09-23	1.2.270.1145.1898.2264.3626	Russian federation	Europe	Eastern Europe
SRR6901127	2016-10-18	1.1.2.1326.544.2643.6036	Saudi arabia	Asia	Western Asia
SRR5633338	2017-04-25	1.1.2.1326.544.3723.7212	Saudi arabia	Asia	Western Asia
SRR1958427	2014-08-29	1.1.2.1326.544.571.930	Saudi arabia	Asia	Western Asia
SRR7468936	2018-02-06	1.1.2.147.1047.4448.9361	Saudi arabia	Asia	Western Asia
SRR8137285	2018-09-13	1.1.2.274.274.4281.11714	Saudi arabia	Asia	Western Asia
SRR7456980	2018-04-27	1.1.2.274.274.4281.9878	Saudi arabia	Asia	Western Asia
SRR7458633	2018-01-23	1.1.2.274.3362.4435.9302	Saudi arabia	Asia	Western Asia
SRR5632175	2017-02-06	1.1.2.28.195.195.6922	Saudi arabia	Asia	Western Asia
SRR5193675	2016-04-28	1.1.2.28.535.2659.4633	Saudi arabia	Asia	Western Asia
SRR6898859	2017-09-21	1.1.2.359.983.1104.8457	Saudi arabia	Asia	Western Asia
SRR1968728	2015-03-09	1.1.2.504.1236.1407.1908	Saudi arabia	Asia	Western Asia
SRR7439550	2015-09-30	1.1.2.504.1236.2272.3652	Saudi arabia	Asia	Western Asia
SRR6919308	2016-11-15	1.1.2.504.2607.3284.6290	Saudi arabia	Asia	Western Asia
SRR6924059	2017-09-19	1.1.2.504.3191.4127.8447	Saudi arabia	Asia	Western Asia
SRR8833187	2019-03-19	1.1.2.504.4111.5863.12858	Saudi arabia	Asia	Western Asia
SRR7349374	2015-06-15	1.1.2.504.633.1999.2935	Saudi arabia	Asia	Western Asia
SRR3286572	2015-04-15	1.1.2.504.967.1440.1955	Saudi arabia	Asia	Western Asia
SRR1961770	2014-12-31	1.1.2.504.967.1440.1970	Saudi arabia	Asia	Western Asia
SRR6900611	2017-05-04	1.1.2.504.967.1440.7248	Saudi arabia	Asia	Western Asia
SRR6919740	2017-11-29	1.1.2.504.967.4284.8936	Saudi arabia	Asia	Western Asia
SRR8397154	2018-12-18	1.2.3.18.180.180.12575	Saudi arabia	Asia	Western Asia
SRR8724678	2019-02-27	1.2.3.18.365.1120.12788	Saudi arabia	Asia	Western Asia
SRR1967526	2014-05-07	1.3.154.272.272.272.272	Saudi arabia	Asia	Western Asia
SRR8172826	2018-10-23	1.1.185.1138.3091.3940.12298	Singapore	Asia	South-eastern Asia
SRR1957918	2014-09-23	1.1.2.157.157.157.157	Singapore	Asia	South-eastern Asia
SRR5220466	2015-04-27	1.1.2.206.1660.1916.2716	Singapore	Asia	South-eastern Asia
SRR5584871	2017-05-03	1.1.2.206.1980.3725.7216	Singapore	Asia	South-eastern Asia
SRR1966294	2014-11-05	1.1.2.206.227.227.227	Singapore	Asia	South-eastern Asia
SRR6924082	2017-04-28	1.1.2.206.2466.3074.7236	Singapore	Asia	South-eastern Asia
SRR1963443	2014-12-01	1.1.2.206.508.679.830	Singapore	Asia	South-eastern Asia
SRR1958005	2014-08-29	1.1.2.206.758.829.1051	Singapore	Asia	South-eastern Asia
SRR7358374	2018-05-11	1.1.2.2306.3558.4722.9945	Singapore	Asia	South-eastern Asia
SRR1958385	2014-09-25	1.1.2.28.195.1454.1973	Singapore	Asia	South-eastern Asia
SRR6920162	2017-12-04	1.1.2.28.1998.4301.8984	Singapore	Asia	South-eastern Asia
SRR5220867	2015-11-09	1.1.2.28.2010.2417.3984	Singapore	Asia	South-eastern Asia
SRR8553928	2017-07-25	1.1.2.28.3100.3965.7869	Singapore	Asia	South-eastern Asia
SRR3285441	2015-12-17	1.1.2.28.354.354.4201	Singapore	Asia	South-eastern Asia
SRR7251107	2015-04-17	1.1.2.4.1654.1908.2685	Singapore	Asia	South-eastern Asia
SRR8509052	2018-04-16	1.1.2.4.3525.4662.9783	Singapore	Asia	South-eastern Asia
SRR1960144	2015-01-05	1.1.2.4.4.1165.1553	Singapore	Asia	South-eastern Asia
SRR7457938	2015-04-08	1.1.2.4.4.1909.2701	Singapore	Asia	South-eastern Asia
SRR8288221	2018-11-26	1.1.2.4.4.5719.12478	Singapore	Asia	South-eastern Asia
SRR5215737	2015-12-01	1.1.2.7.2046.2476.4136	Singapore	Asia	South-eastern Asia
SRR7841326	2018-07-17	1.1.2.7.3625.4854.10442	Singapore	Asia	South-eastern Asia
SRR1965938	2015-03-16	1.1.208.623.859.955.1226	Singapore	Asia	South-eastern Asia
SRR8503781	2018-04-17	1.1.226.1700.3540.4688.9831	Singapore	Asia	South-eastern Asia
SRR4063710	2016-02-17	1.2.3.18.2123.2584.4434	South africa	Africa	Sub-Saharan Africa
SRR8509103	2018-04-26	1.2.3.18.3538.4681.9817	South africa	Africa	Sub-Saharan Africa
SRR5584680	2017-01-10	1.2.3.18.365.1120.6862	South africa	Africa	Sub-Saharan Africa
SRR5583841	2017-02-24	1.2.3.18.365.1120.7023	South africa	Africa	Sub-Saharan Africa
SRR8508560	2018-03-08	1.2.3.18.365.3656.9676	South africa	Africa	Sub-Saharan Africa
SRR7359619	2018-03-08	1.2.3.18.365.3656.9698	South africa	Africa	Sub-Saharan Africa
SRR6900962	2017-08-09	1.2.3.18.365.3946.7788	South africa	Africa	Sub-Saharan Africa
SRR1965486	2014-06-27	1.2.3.18.365.476.521	South africa	Africa	Sub-Saharan Africa
SRR7892248	2018-09-11	1.2.3.18.365.5431.11689	South africa	Africa	Sub-Saharan Africa
SRR8490750	2018-09-27	3.4.8.1691.4008.5624.12043	South africa	Africa	Sub-Saharan Africa
SRR3284689	2015-11-11	1.1.2.1065.1746.2051.3585	Spain	Europe	Southern Europe
SRR5220516	2015-11-27	1.1.2.1065.1746.2051.4107	Spain	Europe	Southern Europe
SRR5193307	2015-07-24	1.1.2.1072.1759.2066.3148	Spain	Europe	Southern Europe
SRR6918330	2016-06-15	1.1.2.1072.2219.2735.4837	Spain	Europe	Southern Europe
SRR8142765	2018-10-18	1.1.2.12.421.429.12206	Spain	Europe	Southern Europe
SRR1957812	2014-09-10	1.1.2.131.131.131.131	Spain	Europe	Southern Europe
SRR1968831	2014-10-01	1.1.2.131.456.1040.1441	Spain	Europe	Southern Europe
SRR3286812	2015-06-10	1.1.2.131.456.1040.2926	Spain	Europe	Southern Europe
SRR6901064	2017-10-02	1.1.2.131.456.1040.5082	Spain	Europe	Southern Europe
SRR5193699	2016-10-04	1.1.2.131.456.1040.5862	Spain	Europe	Southern Europe
SRR6900363	2017-01-10	1.1.2.131.456.1040.6850	Spain	Europe	Southern Europe
SRR3285361	2015-09-29	1.1.2.131.456.2311.3745	Spain	Europe	Southern Europe
SRR6919114	2016-02-17	1.1.2.131.456.470.4429	Spain	Europe	Southern Europe
SRR5220873	2016-07-19	1.1.2.131.456.470.5013	Spain	Europe	Southern Europe
SRR5216146	2016-07-29	1.1.2.131.456.470.5063	Spain	Europe	Southern Europe
SRR6919287	2017-09-21	1.1.2.131.456.470.8459	Spain	Europe	Southern Europe
SRR5193600	2015-10-28	1.1.2.1326.373.2393.3918	Spain	Europe	Southern Europe
SRR5193208	2016-10-03	1.1.2.1326.373.2419.5828	Spain	Europe	Southern Europe
SRR1968969	2014-11-05	1.1.2.138.138.138.832	Spain	Europe	Southern Europe
SRR1970135	2014-09-17	1.1.2.166.166.166.166	Spain	Europe	Southern Europe
SRR6900452	2017-08-22	1.1.2.167.167.167.8145	Spain	Europe	Southern Europe
SRR6919718	2017-09-19	1.1.2.167.167.167.8437	Spain	Europe	Southern Europe
SRR5583221	2017-03-07	1.1.2.1709.2485.3678.7059	Spain	Europe	Southern Europe
SRR7456732	2018-02-28	1.1.2.1709.2485.4623.9707	Spain	Europe	Southern Europe
SRR8183061	2018-10-30	1.1.2.2066.411.3654.12339	Spain	Europe	Southern Europe
SRR8249759	2018-11-09	1.1.2.2066.411.3654.12419	Spain	Europe	Southern Europe
SRR7286907	2015-08-14	1.1.2.2066.411.3654.3341	Spain	Europe	Southern Europe
SRR5194262	2016-07-11	1.1.2.2066.411.3654.4941	Spain	Europe	Southern Europe
SRR5216399	2016-08-24	1.1.2.2066.411.3654.5212	Spain	Europe	Southern Europe
SRR5193844	2016-09-02	1.1.2.2066.411.3654.5531	Spain	Europe	Southern Europe
SRR6918647	2016-11-01	1.1.2.2066.411.3654.5910	Spain	Europe	Southern Europe
SRR6920022	2017-10-05	1.1.2.2066.411.3654.8540	Spain	Europe	Southern Europe
SRR6898875	2017-10-16	1.1.2.2066.411.3654.8658	Spain	Europe	Southern Europe
SRR3285352	2015-07-20	1.1.2.208.208.1938.2875	Spain	Europe	Southern Europe
SRR5220932	2015-07-14	1.1.2.208.208.1938.3120	Spain	Europe	Southern Europe
SRR6919747	2016-05-10	1.1.2.208.208.1938.4667	Spain	Europe	Southern Europe
SRR5193498	2016-07-26	1.1.2.208.208.1938.5033	Spain	Europe	Southern Europe
SRR1968443	2014-10-21	1.1.2.208.208.208.208	Spain	Europe	Southern Europe
SRR1967416	2014-11-04	1.1.2.208.208.430.460	Spain	Europe	Southern Europe
SRR5220531	2015-05-06	1.1.2.208.208.560.2770	Spain	Europe	Southern Europe
SRR8724686	2015-07-28	1.1.2.208.208.560.3216	Spain	Europe	Southern Europe
SRR3323006	2015-10-15	1.1.2.208.208.560.3831	Spain	Europe	Southern Europe
SRR7286819	2015-10-26	1.1.2.208.208.560.3955	Spain	Europe	Southern Europe
SRR5216298	2016-05-25	1.1.2.208.208.560.4706	Spain	Europe	Southern Europe
SRR6900843	2016-07-27	1.1.2.208.208.560.5046	Spain	Europe	Southern Europe
SRR3048852	2014-10-08	1.1.2.208.208.560.650	Spain	Europe	Southern Europe
SRR1965182	2014-11-04	1.1.2.208.208.786.981	Spain	Europe	Southern Europe
SRR1958398	2014-10-15	1.1.2.208.614.655.2208	Spain	Europe	Southern Europe
SRR6922127	2017-10-17	1.1.2.230.230.2078.8677	Spain	Europe	Southern Europe
SRR1965681	2014-10-07	1.1.2.230.230.230.230	Spain	Europe	Southern Europe
SRR8893102	2019-04-02	1.1.2.2309.3074.3907.12912	Spain	Europe	Southern Europe
SRR8936128	2019-04-01	1.1.2.2309.3074.3907.12928	Spain	Europe	Southern Europe
SRR8568744	2017-06-23	1.1.2.2309.3074.3907.7644	Spain	Europe	Southern Europe
SRR6900049	2017-07-03	1.1.2.2309.3074.3907.7652	Spain	Europe	Southern Europe
SRR7495449	2017-07-13	1.1.2.2309.3074.3907.7682	Spain	Europe	Southern Europe
SRR6900693	2017-07-10	1.1.2.2309.3074.3907.7740	Spain	Europe	Southern Europe
SRR6919840	2017-08-10	1.1.2.2309.3074.3907.7947	Spain	Europe	Southern Europe
SRR6900274	2017-08-25	1.1.2.2309.3074.3907.8191	Spain	Europe	Southern Europe
SRR6899328	2017-09-29	1.1.2.2309.3074.3907.8552	Spain	Europe	Southern Europe
SRR6920599	2017-11-03	1.1.2.2309.3074.3907.8782	Spain	Europe	Southern Europe
SRR6924142	2017-11-10	1.1.2.2309.3074.3907.8866	Spain	Europe	Southern Europe
SRR7890377	2018-02-07	1.1.2.2309.3074.3907.9369	Spain	Europe	Southern Europe
SRR8304788	2018-10-05	1.1.2.2546.3840.5332.12105	Spain	Europe	Southern Europe
SRR5220321	2016-07-26	1.1.2.274.2260.2798.5022	Spain	Europe	Southern Europe
SRR8490787	2018-12-03	1.1.2.28.195.195.12511	Spain	Europe	Southern Europe
SRR5632731	2017-01-17	1.1.2.28.195.195.6883	Spain	Europe	Southern Europe
SRR8325468	2018-12-03	1.1.2.28.195.195.8125	Spain	Europe	Southern Europe
SRR7866996	2018-07-10	1.1.2.28.195.457.10404	Spain	Europe	Southern Europe
SRR1965746	2014-05-12	1.1.2.31.31.1283.1729	Spain	Europe	Southern Europe
SRR3049564	2014-06-05	1.1.2.31.31.31.31	Spain	Europe	Southern Europe
SRR5193120	2015-07-21	1.1.2.63.1758.2065.3147	Spain	Europe	Southern Europe
SRR7468939	2015-09-11	1.1.2.63.1758.2065.3439	Spain	Europe	Southern Europe
SRR5220462	2016-08-23	1.1.2.63.1758.2065.5240	Spain	Europe	Southern Europe
SRR7828454	2018-08-30	1.1.2.63.1758.5385.11577	Spain	Europe	Southern Europe
SRR1967033	2014-08-08	1.1.2.63.63.1421.1926	Spain	Europe	Southern Europe
SRR7892158	2018-09-11	1.1.2.63.63.3346.11691	Spain	Europe	Southern Europe
SRR1967985	2014-10-01	1.1.2.63.63.603.2053	Spain	Europe	Southern Europe
SRR1965385	2014-10-06	1.1.2.63.63.63.1618	Spain	Europe	Southern Europe
SRR1966311	2014-09-30	1.1.2.63.63.63.2017	Spain	Europe	Southern Europe
SRR1966738	2014-10-07	1.1.2.63.63.755.940	Spain	Europe	Southern Europe
SRR1966199	2014-05-23	1.1.2.80.100.100.100	Spain	Europe	Southern Europe
SRR5215482	2016-08-02	1.1.2.80.100.100.5095	Spain	Europe	Southern Europe
SRR1968401	2014-08-15	1.1.2.80.100.100.565	Spain	Europe	Southern Europe
SRR6899509	2017-08-08	1.1.2.80.100.100.7880	Spain	Europe	Southern Europe
SRR6921916	2017-09-15	1.1.2.80.100.100.8421	Spain	Europe	Southern Europe
SRR5216277	2016-05-05	1.1.2.80.1121.1266.4641	Spain	Europe	Southern Europe
SRR5216238	2016-05-06	1.1.2.80.1121.1266.4643	Spain	Europe	Southern Europe
SRR8300686	2018-08-31	1.1.2.80.1373.1574.11564	Spain	Europe	Southern Europe
SRR8724642	2015-07-31	1.1.2.80.1373.1574.2152	Spain	Europe	Southern Europe
SRR5193426	2015-07-08	1.1.2.80.1373.1574.3125	Spain	Europe	Southern Europe
SRR7297935	2015-07-17	1.1.2.80.1373.1574.3138	Spain	Europe	Southern Europe
SRR8724952	2015-07-16	1.1.2.80.1373.1574.3139	Spain	Europe	Southern Europe
SRR6922565	2016-06-21	1.1.2.80.1373.1574.4036	Spain	Europe	Southern Europe
SRR8436106	2018-07-09	1.1.2.80.1373.4841.10377	Spain	Europe	Southern Europe
SRR7187243	2015-09-22	1.1.2.80.1389.1597.3645	Spain	Europe	Southern Europe
SRR1965204	2015-02-24	1.1.2.80.164.164.1160	Spain	Europe	Southern Europe
SRR1968590	2014-07-17	1.1.2.80.164.164.164	Spain	Europe	Southern Europe
SRR8380683	2018-07-17	1.1.2.80.1903.2273.10474	Spain	Europe	Southern Europe
SRR8368704	2018-07-31	1.1.2.80.1903.2273.10616	Spain	Europe	Southern Europe
SRR8106760	2018-09-21	1.1.2.80.1903.2273.11918	Spain	Europe	Southern Europe
SRR5220821	2015-09-28	1.1.2.80.1903.2273.3654	Spain	Europe	Southern Europe
SRR5193038	2016-09-13	1.1.2.80.1903.2273.5636	Spain	Europe	Southern Europe
SRR6898444	2017-10-03	1.1.2.80.1903.2273.7912	Spain	Europe	Southern Europe
SRR6899399	2017-10-16	1.1.2.80.1903.2273.8653	Spain	Europe	Southern Europe
SRR1957755	2014-09-10	1.1.2.80.207.207.1672	Spain	Europe	Southern Europe
SRR1965813	2014-10-14	1.1.2.80.207.207.207	Spain	Europe	Southern Europe
SRR1966754	2014-09-11	1.1.2.80.207.207.2261	Spain	Europe	Southern Europe
SRR7962240	2018-09-13	1.1.2.80.453.467.11709	Spain	Europe	Southern Europe
SRR1968857	2014-11-10	1.1.2.80.453.467.1182	Spain	Europe	Southern Europe
SRR1965671	2014-11-04	1.1.2.80.453.467.1923	Spain	Europe	Southern Europe
SRR5193652	2016-05-24	1.1.2.80.453.467.3463	Spain	Europe	Southern Europe
SRR6899256	2017-08-03	1.1.2.80.453.467.7814	Spain	Europe	Southern Europe
SRR7892210	2017-08-01	1.1.2.80.453.467.7898	Spain	Europe	Southern Europe
SRR6922666	2017-07-19	1.1.2.80.453.467.8021	Spain	Europe	Southern Europe
SRR6919161	2017-09-14	1.1.2.80.453.467.8382	Spain	Europe	Southern Europe
SRR7359062	2015-10-01	1.1.2.80.635.680.3656	Spain	Europe	Southern Europe
SRR1966215	2014-09-16	1.1.2.83.83.826.1187	Spain	Europe	Southern Europe
SRR1967838	2014-08-13	1.1.2.83.83.83.925	Spain	Europe	Southern Europe
SRR7410281	2018-06-11	1.1.228.1033.1681.1946.10114	Spain	Europe	Southern Europe
SRR3585376	2015-05-11	1.1.228.1033.1681.1946.2785	Spain	Europe	Southern Europe
SRR5220694	2015-10-08	1.1.228.1033.1681.1946.3797	Spain	Europe	Southern Europe
SRR6924068	2017-08-02	1.1.228.1033.1681.1946.8091	Spain	Europe	Southern Europe
SRR6900198	2017-09-08	1.1.228.1033.1681.1946.8144	Spain	Europe	Southern Europe
SRR6898843	2017-09-07	1.1.228.1033.1681.1946.8303	Spain	Europe	Southern Europe
SRR7495715	2018-01-25	1.1.228.1033.1681.1946.9305	Spain	Europe	Southern Europe
SRR7416262	2017-07-06	1.1.228.1033.1681.3935.7736	Spain	Europe	Southern Europe
SRR6900719	2017-08-01	1.1.228.1033.1681.3935.7827	Spain	Europe	Southern Europe
SRR7369167	2015-11-10	1.1.234.1045.1708.2437.4033	Spain	Europe	Southern Europe
SRR7842555	2018-07-06	1.1.63.97.1353.2016.10376	Spain	Europe	Southern Europe
SRR6897174	2017-06-19	1.1.63.97.1353.2016.7625	Spain	Europe	Southern Europe
SRR6922728	2017-08-08	1.1.63.97.1353.2016.7866	Spain	Europe	Southern Europe
SRR6922744	2017-08-09	1.1.63.97.1353.2016.7903	Spain	Europe	Southern Europe
SRR6900206	2017-09-04	1.1.63.97.1353.2016.8279	Spain	Europe	Southern Europe
SRR6918886	2017-09-07	1.1.63.97.1353.2016.8300	Spain	Europe	Southern Europe
SRR6901145	2017-09-28	1.1.63.97.1353.2016.8528	Spain	Europe	Southern Europe
SRR6900370	2017-08-02	1.1.63.97.1353.4020.8099	Spain	Europe	Southern Europe
SRR8131514	2018-09-13	1.12.724.2561.3885.5435.11713	Spain	Europe	Southern Europe
SRR7204302	2015-08-19	1.2.3.1089.1805.2138.3323	Spain	Europe	Southern Europe
SRR8118258	2018-09-20	1.2.3.151.151.151.11439	Spain	Europe	Southern Europe
SRR8936154	2019-04-02	1.2.3.151.151.151.11652	Spain	Europe	Southern Europe
SRR8738298	2019-03-05	1.2.3.151.151.151.12810	Spain	Europe	Southern Europe
SRR1965138	2014-07-29	1.2.3.151.151.151.1701	Spain	Europe	Southern Europe
SRR8735162	2015-07-24	1.2.3.151.151.151.3167	Spain	Europe	Southern Europe
SRR6900541	2016-08-22	1.2.3.151.151.151.5149	Spain	Europe	Southern Europe
SRR5193678	2016-08-23	1.2.3.151.151.151.5187	Spain	Europe	Southern Europe
SRR1967574	2014-07-31	1.2.3.151.151.151.798	Spain	Europe	Southern Europe
SRR6922497	2017-09-07	1.2.3.151.151.151.8155	Spain	Europe	Southern Europe
SRR6919162	2017-07-18	1.2.3.151.151.718.7750	Spain	Europe	Southern Europe
SRR7443860	2018-06-19	1.2.3.151.151.783.10149	Spain	Europe	Southern Europe
SRR7892257	2018-09-11	1.2.3.151.151.783.11684	Spain	Europe	Southern Europe
SRR7903045	2018-09-12	1.2.3.151.151.783.11694	Spain	Europe	Southern Europe
SRR8117004	2018-10-15	1.2.3.151.151.783.12059	Spain	Europe	Southern Europe
SRR8137420	2018-10-10	1.2.3.151.151.783.12124	Spain	Europe	Southern Europe
SRR8137363	2018-10-17	1.2.3.151.151.783.12212	Spain	Europe	Southern Europe
SRR8149424	2018-10-19	1.2.3.151.151.783.12269	Spain	Europe	Southern Europe
SRR7458571	2015-09-14	1.2.3.151.151.783.2809	Spain	Europe	Southern Europe
SRR5220942	2015-10-16	1.2.3.151.151.783.3026	Spain	Europe	Southern Europe
SRR5220325	2015-09-29	1.2.3.151.151.783.3681	Spain	Europe	Southern Europe
SRR5193493	2015-10-06	1.2.3.151.151.783.3739	Spain	Europe	Southern Europe
SRR5216121	2016-07-07	1.2.3.151.151.783.4927	Spain	Europe	Southern Europe
SRR8553930	2017-08-01	1.2.3.151.151.783.7812	Spain	Europe	Southern Europe
SRR6919750	2017-07-18	1.2.3.151.151.783.7828	Spain	Europe	Southern Europe
SRR6900688	2017-07-17	1.2.3.151.151.783.7913	Spain	Europe	Southern Europe
SRR7511922	2015-08-13	1.2.3.151.1800.2130.3307	Spain	Europe	Southern Europe
SRR1967215	2014-07-29	1.2.3.151.356.372.1078	Spain	Europe	Southern Europe
SRR1967921	2014-07-03	1.2.3.151.356.372.1202	Spain	Europe	Southern Europe
SRR1968355	2014-10-28	1.2.3.151.356.372.1400	Spain	Europe	Southern Europe
SRR1968620	2014-07-01	1.2.3.151.356.372.1849	Spain	Europe	Southern Europe
SRR5220506	2015-09-29	1.2.3.151.356.372.3670	Spain	Europe	Southern Europe
SRR1970316	2014-09-16	1.2.3.151.356.372.379	Spain	Europe	Southern Europe
SRR5216512	2016-06-14	1.2.3.151.356.372.4825	Spain	Europe	Southern Europe
SRR5193241	2016-07-29	1.2.3.151.356.372.5061	Spain	Europe	Southern Europe
SRR1968851	2014-05-23	1.2.3.151.356.372.641	Spain	Europe	Southern Europe
SRR1966120	2014-07-31	1.2.3.151.356.372.647	Spain	Europe	Southern Europe
SRR5585115	2017-01-31	1.2.3.151.356.372.6879	Spain	Europe	Southern Europe
SRR3049234	2014-05-07	1.2.3.151.356.372.889	Spain	Europe	Southern Europe
SRR3049690	2014-10-08	1.2.3.151.356.423.957	Spain	Europe	Southern Europe
SRR7475508	2018-06-21	1.2.3.151.356.4685.10165	Spain	Europe	Southern Europe
SRR8485047	2018-10-12	1.2.3.151.356.4685.12162	Spain	Europe	Southern Europe
SRR8116981	2018-10-15	1.2.3.151.356.4685.12202	Spain	Europe	Southern Europe
SRR3284735	2015-07-08	1.2.3.151.362.2038.3062	Spain	Europe	Southern Europe
SRR7884511	2018-09-06	1.2.3.151.362.363.11662	Spain	Europe	Southern Europe
SRR3312312	2015-07-23	1.2.3.151.362.363.3032	Spain	Europe	Southern Europe
SRR3319057	2015-07-17	1.2.3.151.362.363.3095	Spain	Europe	Southern Europe
SRR3319060	2015-09-03	1.2.3.151.362.363.3417	Spain	Europe	Southern Europe
SRR5216213	2016-08-31	1.2.3.151.362.363.5270	Spain	Europe	Southern Europe
SRR5193388	2016-09-20	1.2.3.151.362.363.5678	Spain	Europe	Southern Europe
SRR5220546	2016-09-20	1.2.3.151.362.363.5718	Spain	Europe	Southern Europe
SRR6900944	2016-09-23	1.2.3.151.362.363.5755	Spain	Europe	Southern Europe
SRR5194266	2016-10-26	1.2.3.151.362.363.6077	Spain	Europe	Southern Europe
SRR1968164	2015-01-22	1.2.3.151.378.381.388	Spain	Europe	Southern Europe
SRR1958347	2014-10-09	1.2.3.151.552.580.2303	Spain	Europe	Southern Europe
SRR1965796	2014-05-19	1.2.3.151.759.830.1054	Spain	Europe	Southern Europe
SRR1967754	2014-05-13	1.2.3.151.759.830.1077	Spain	Europe	Southern Europe
SRR3048603	2015-01-20	1.2.3.151.783.859.1096	Spain	Europe	Southern Europe
SRR1966899	2014-06-05	1.2.3.151.839.932.1196	Spain	Europe	Southern Europe
SRR8272559	2018-09-10	1.2.3.18.1686.1956.11657	Spain	Europe	Southern Europe
SRR3321876	2015-05-29	1.2.3.18.1686.1956.2829	Spain	Europe	Southern Europe
SRR7890409	2018-05-22	1.2.3.18.175.175.10000	Spain	Europe	Southern Europe
SRR8380676	2018-07-17	1.2.3.18.175.175.10445	Spain	Europe	Southern Europe
SRR6922603	2017-09-29	1.2.3.18.175.175.7619	Spain	Europe	Southern Europe
SRR6920114	2017-07-04	1.2.3.18.180.180.10797	Spain	Europe	Southern Europe
SRR6897887	2017-05-04	1.2.3.18.180.180.10820	Spain	Europe	Southern Europe
SRR6899257	2017-06-26	1.2.3.18.180.180.10888	Spain	Europe	Southern Europe
SRR6900919	2017-09-05	1.2.3.18.180.180.10899	Spain	Europe	Southern Europe
SRR8492378	2018-06-19	1.2.3.18.180.180.10909	Spain	Europe	Southern Europe
SRR6922473	2017-09-06	1.2.3.18.180.180.10916	Spain	Europe	Southern Europe
SRR6919256	2017-08-30	1.2.3.18.180.180.10929	Spain	Europe	Southern Europe
SRR8490656	2018-06-28	1.2.3.18.180.180.10942	Spain	Europe	Southern Europe
SRR8509387	2018-02-23	1.2.3.18.180.180.10944	Spain	Europe	Southern Europe
SRR6900867	2017-09-07	1.2.3.18.180.180.10961	Spain	Europe	Southern Europe
SRR7867006	2018-08-16	1.2.3.18.180.180.10985	Spain	Europe	Southern Europe
SRR7850565	2018-07-23	1.2.3.18.180.180.10987	Spain	Europe	Southern Europe
SRR6900660	2017-09-06	1.2.3.18.180.180.10998	Spain	Europe	Southern Europe
SRR6900760	2017-10-11	1.2.3.18.180.180.11021	Spain	Europe	Southern Europe
SRR7841531	2018-07-17	1.2.3.18.180.180.11037	Spain	Europe	Southern Europe
SRR6920443	2017-09-07	1.2.3.18.180.180.11047	Spain	Europe	Southern Europe
SRR7842532	2018-07-09	1.2.3.18.180.180.11053	Spain	Europe	Southern Europe
SRR6897896	2017-08-30	1.2.3.18.180.180.11056	Spain	Europe	Southern Europe
SRR6924093	2017-08-29	1.2.3.18.180.180.11082	Spain	Europe	Southern Europe
SRR6897884	2017-08-29	1.2.3.18.180.180.11156	Spain	Europe	Southern Europe
SRR6919804	2017-08-30	1.2.3.18.180.180.11185	Spain	Europe	Southern Europe
SRR7480136	2017-06-23	1.2.3.18.180.180.11205	Spain	Europe	Southern Europe
SRR7867207	2018-08-08	1.2.3.18.180.180.11379	Spain	Europe	Southern Europe
SRR7879524	2018-08-21	1.2.3.18.180.180.11401	Spain	Europe	Southern Europe
SRR8350312	2018-08-13	1.2.3.18.180.180.11411	Spain	Europe	Southern Europe
SRR8087146	2018-10-01	1.2.3.18.180.180.11599	Spain	Europe	Southern Europe
SRR7910408	2018-09-13	1.2.3.18.180.180.11600	Spain	Europe	Southern Europe
SRR8106751	2018-09-27	1.2.3.18.180.180.11748	Spain	Europe	Southern Europe
SRR8114896	2018-09-20	1.2.3.18.180.180.11801	Spain	Europe	Southern Europe
SRR7998244	2018-09-24	1.2.3.18.180.180.11839	Spain	Europe	Southern Europe
SRR7997046	2018-09-21	1.2.3.18.180.180.11959	Spain	Europe	Southern Europe
SRR8084338	2018-10-02	1.2.3.18.180.180.12056	Spain	Europe	Southern Europe
SRR8117048	2018-10-03	1.2.3.18.180.180.12116	Spain	Europe	Southern Europe
SRR8084258	2018-10-09	1.2.3.18.180.180.12121	Spain	Europe	Southern Europe
SRR8114914	2018-10-11	1.2.3.18.180.180.12178	Spain	Europe	Southern Europe
SRR8204806	2018-11-07	1.2.3.18.180.180.12375	Spain	Europe	Southern Europe
SRR8272657	2018-11-08	1.2.3.18.180.180.12401	Spain	Europe	Southern Europe
SRR8258092	2018-11-09	1.2.3.18.180.180.12416	Spain	Europe	Southern Europe
SRR8637893	2019-01-31	1.2.3.18.180.180.12704	Spain	Europe	Southern Europe
SRR8706107	2019-02-25	1.2.3.18.180.180.12791	Spain	Europe	Southern Europe
SRR8943116	2019-04-02	1.2.3.18.180.180.12909	Spain	Europe	Southern Europe
SRR6900610	2017-09-21	1.2.3.18.180.5092.10792	Spain	Europe	Southern Europe
SRR6920142	2017-07-24	1.2.3.18.180.5092.10808	Spain	Europe	Southern Europe
SRR6924077	2017-09-13	1.2.3.18.180.5092.10971	Spain	Europe	Southern Europe
SRR6901185	2017-11-22	1.2.3.18.3228.4197.8679	Spain	Europe	Southern Europe
SRR8509253	2018-06-25	1.2.3.18.353.353.10251	Spain	Europe	Southern Europe
SRR6924045	2017-09-20	1.2.3.18.359.360.8440	Spain	Europe	Southern Europe
SRR7850472	2018-07-16	1.2.3.18.3648.4900.10574	Spain	Europe	Southern Europe
SRR6918866	2017-10-04	1.2.3.18.382.2750.8592	Spain	Europe	Southern Europe
SRR5193953	2015-10-07	1.2.3.18.536.1947.2789	Spain	Europe	Southern Europe
SRR5220308	2015-07-22	1.2.3.18.536.1947.3184	Spain	Europe	Southern Europe
SRR6900460	2016-10-03	1.2.3.18.536.1947.5758	Spain	Europe	Southern Europe
SRR6918558	2017-07-04	1.2.3.18.536.1947.7701	Spain	Europe	Southern Europe
SRR8367065	2018-12-11	1.2.3.18.536.5744.12546	Spain	Europe	Southern Europe
SRR6898474	2017-07-21	1.2.3.2326.3120.4005.8054	Spain	Europe	Southern Europe
SRR5215542	2016-08-23	1.21.438.1592.2319.2889.5257	Spain	Europe	Southern Europe
SRR3049116	2014-04-25	1.5.159.280.280.280.280	Spain	Europe	Southern Europe
SRR5216495	2015-08-06	1.5.159.280.280.280.3258	Spain	Europe	Southern Europe
SRR6897936	2017-05-30	1.5.159.280.280.280.7377	Spain	Europe	Southern Europe
SRR5216332	2016-09-01	1.5.201.507.2358.2936.5345	Spain	Europe	Southern Europe
SRR6920138	2017-09-21	1.5.201.507.2358.4140.8479	Spain	Europe	Southern Europe
SRR6900131	2017-05-03	1.5.201.507.2954.3727.7220	Spain	Europe	Southern Europe
SRR7962274	2018-09-17	1.5.321.1298.3897.5453.11769	Spain	Europe	Southern Europe
SRR5220876	2015-10-14	1.5.72.115.115.2306.3833	Spain	Europe	Southern Europe
SRR7416369	2017-12-12	1.5.72.115.115.2656.6825	Spain	Europe	Southern Europe
SRR6922076	2017-12-21	1.5.72.115.115.2656.9053	Spain	Europe	Southern Europe
SRR6919989	2017-08-16	1.5.72.115.115.3133.8143	Spain	Europe	Southern Europe
SRR8117025	2018-10-03	1.75.332.2646.4024.5657.12184	Spain	Europe	Southern Europe
SRR5216123	2016-05-24	3.4.314.1278.2195.2693.4712	Spain	Europe	Southern Europe
SRR8172828	2018-10-23	3.4.49.2334.3142.4050.12295	Spain	Europe	Southern Europe
SRR6921960	2017-08-22	3.4.49.2334.3142.4050.8171	Spain	Europe	Southern Europe
SRR5193937	2015-10-05	3.4.8.14.14.2302.3727	Spain	Europe	Southern Europe
SRR6919024	2016-09-01	3.4.8.236.236.236.5330	Spain	Europe	Southern Europe
SRR1970029	2014-08-28	31.17.71.114.114.114.114	Spain	Europe	Southern Europe
SRR5757203	2015-12-03	31.48.261.1201.2041.2469.4114	Spain	Europe	Southern Europe
SRR5194003	2016-10-04	1.1.2.1140.1891.2257.5864	Sri lanka	Asia	Southern Asia
SRR7257133	2015-09-14	1.1.2.1326.544.2234.3544	Sri lanka	Asia	Southern Asia
SRR1969095	2015-01-27	1.1.2.178.178.1626.2223	Sri lanka	Asia	Southern Asia
SRR5193455	2015-09-08	1.1.2.178.1855.2205.4265	Sri lanka	Asia	Southern Asia
SRR8448461	2019-01-04	1.1.2.178.1855.4562.12609	Sri lanka	Asia	Southern Asia
SRR8490843	2018-10-11	1.1.2.178.3157.4073.12159	Sri lanka	Asia	Southern Asia
SRR8503807	2018-06-08	1.1.2.178.3588.4768.10100	Sri lanka	Asia	Southern Asia
SRR8648339	2019-02-11	1.1.2.178.4093.5822.12741	Sri lanka	Asia	Southern Asia
SRR3049702	2014-04-30	1.1.2.284.1119.1264.1697	Sri lanka	Asia	Southern Asia
SRR7187263	2015-06-26	1.1.2.284.2575.3234.6161	Sri lanka	Asia	Southern Asia
SRR1963349	2015-01-07	1.1.2.550.735.799.999	Sri lanka	Asia	Southern Asia
SRR3286613	2015-04-08	1.1.2.601.817.897.1146	Sri lanka	Asia	Southern Asia
SRR3284822	2015-09-30	1.1.2.67.1905.2275.3660	Sri lanka	Asia	Southern Asia
SRR6922720	2015-12-31	1.1.2.67.67.2517.4254	Sri lanka	Asia	Southern Asia
SRR5216144	2016-12-01	1.1.2.67.67.3304.6369	Sri lanka	Asia	Southern Asia
SRR7468879	2015-11-20	1.1.2.67.67.676.3916	Sri lanka	Asia	Southern Asia
SRR1969673	2015-03-17	1.1.2.67.67.676.827	Sri lanka	Asia	Southern Asia
SRR6918645	2017-10-16	1.30.188.2246.3226.4194.8665	Sri lanka	Asia	Southern Asia
SRR6924143	2016-09-20	1.1.2.28.2487.3109.5723	China	Asia	Eastern Asia
SRR6922527	2017-09-12	1.1.2.28.3171.4094.8354	China	Asia	Eastern Asia
SRR6901010	2017-11-09	1.1.2.28.3254.4250.8845	China	Asia	Eastern Asia
SRR5216253	2015-11-17	1.1.2.28.2025.2444.4050	Tanzania	Africa	Sub-Saharan Africa
SRR6899381	2017-08-07	1.1.2.28.2025.3956.7822	Tanzania	Africa	Sub-Saharan Africa
SRR1969721	2014-09-02	1.1.2.28.372.374.1179	Tanzania	Africa	Sub-Saharan Africa
SRR1969926	2014-10-01	1.1.2.28.372.374.381	Tanzania	Africa	Sub-Saharan Africa
SRR1966175	2015-03-05	1.1.2.28.372.374.409	Tanzania	Africa	Sub-Saharan Africa
SRR5216387	2016-07-08	1.1.2.28.372.374.4952	Tanzania	Africa	Sub-Saharan Africa
SRR1967629	2014-09-17	1.1.2.28.372.374.597	Tanzania	Africa	Sub-Saharan Africa
SRR7474377	2018-05-09	1.1.2.28.372.374.9926	Tanzania	Africa	Sub-Saharan Africa
SRR1969741	2014-08-01	1.1.2.28.372.583.692	Tanzania	Africa	Sub-Saharan Africa
SRR8182954	2018-10-30	1.1.2.28.4033.5683.12335	Tanzania	Africa	Sub-Saharan Africa
SRR6919812	2017-09-27	1.1.63.97.1353.2016.8525	Tanzania	Africa	Sub-Saharan Africa
SRR4063702	2015-11-03	1.2.3.18.365.2425.4012	Tanzania	Africa	Sub-Saharan Africa
SRR5216534	2016-09-22	1.1.2.1030.1856.2581.5810	Thailand	Asia	South-eastern Asia
SRR8185543	2018-10-30	1.1.2.1030.1856.2862.12341	Thailand	Asia	South-eastern Asia
SRR7410323	2016-12-13	1.1.2.1030.1856.2862.6454	Thailand	Asia	South-eastern Asia
SRR5631345	2017-04-18	1.1.2.1030.1856.2862.7176	Thailand	Asia	South-eastern Asia
SRR8514482	2018-02-15	1.1.2.1030.1856.2862.9421	Thailand	Asia	South-eastern Asia
SRR7480357	2018-05-22	1.1.2.1030.1856.4622.9995	Thailand	Asia	South-eastern Asia
SRR7867303	2018-08-24	1.1.2.1030.1856.5377.11505	Thailand	Asia	South-eastern Asia
SRR5216367	2016-03-30	1.1.2.1030.2152.2625.4543	Thailand	Asia	South-eastern Asia
SRR6897172	2017-06-26	1.1.2.1030.3080.3916.7677	Thailand	Asia	South-eastern Asia
SRR7402356	2018-06-07	1.1.2.1030.3581.4760.10081	Thailand	Asia	South-eastern Asia
SRR8717172	2015-07-30	1.1.2.1076.1769.2089.3213	Thailand	Asia	South-eastern Asia
SRR5633181	2017-03-24	1.1.2.1076.1769.3696.7114	Thailand	Asia	South-eastern Asia
SRR8437384	2018-07-10	1.1.2.1124.3595.4779.10319	Thailand	Asia	South-eastern Asia
SRR5220104	2017-01-11	1.1.2.116.2763.3579.6856	Thailand	Asia	South-eastern Asia
SRR6899000	2015-12-23	1.1.2.1164.2072.2507.4235	Thailand	Asia	South-eastern Asia
SRR5584725	2017-05-10	1.1.2.1164.2072.3743.7260	Thailand	Asia	South-eastern Asia
SRR7866795	2018-08-01	1.1.2.1164.2072.4965.10632	Thailand	Asia	South-eastern Asia
SRR8548900	2019-01-23	1.1.2.1164.2961.5794.12682	Thailand	Asia	South-eastern Asia
SRR6900612	2017-12-13	1.1.2.1890.3289.4322.9031	Thailand	Asia	South-eastern Asia
SRR3322968	2015-10-27	1.1.2.206.1997.2394.3921	Thailand	Asia	South-eastern Asia
SRR7866787	2018-08-29	1.1.2.215.215.215.11531	Thailand	Asia	South-eastern Asia
SRR1966361	2014-11-04	1.1.2.215.215.215.215	Thailand	Asia	South-eastern Asia
SRR6922134	2017-05-23	1.1.2.2259.2974.3767.7325	Thailand	Asia	South-eastern Asia
SRR7873996	2018-08-15	1.1.2.2336.3145.4054.11452	Thailand	Asia	South-eastern Asia
SRR1968780	2014-11-12	1.1.2.239.239.239.239	Thailand	Asia	South-eastern Asia
SRR1959386	2014-12-09	1.1.2.268.268.268.268	Thailand	Asia	South-eastern Asia
SRR1966976	2015-03-09	1.1.2.28.1463.1689.2328	Thailand	Asia	South-eastern Asia
SRR6900934	2016-01-19	1.1.2.28.1463.2552.4352	Thailand	Asia	South-eastern Asia
SRR5584696	2017-03-06	1.1.2.28.2255.3673.7038	Thailand	Asia	South-eastern Asia
SRR8116983	2018-10-15	1.1.2.28.4025.5658.12186	Thailand	Asia	South-eastern Asia
SRR5216208	2016-12-23	1.1.2.28.429.439.6601	Thailand	Asia	South-eastern Asia
SRR3286635	2015-04-08	1.1.2.28.562.593.706	Thailand	Asia	South-eastern Asia
SRR5193533	2016-05-25	1.1.2.34.2192.2686.4701	Thailand	Asia	South-eastern Asia
SRR6898826	2016-07-28	1.1.2.34.2264.2808.5053	Thailand	Asia	South-eastern Asia
SRR8492371	2018-05-30	1.1.2.34.2296.2850.10050	Thailand	Asia	South-eastern Asia
SRR8369254	2018-07-27	1.1.2.34.2296.2850.10548	Thailand	Asia	South-eastern Asia
SRR8508935	2019-01-18	1.1.2.34.2296.2850.12658	Thailand	Asia	South-eastern Asia
SRR8585165	2019-01-29	1.1.2.34.2296.2850.12696	Thailand	Asia	South-eastern Asia
SRR6900157	2016-09-02	1.1.2.34.2296.2850.5372	Thailand	Asia	South-eastern Asia
SRR6900183	2017-03-30	1.1.2.34.2296.2850.7124	Thailand	Asia	South-eastern Asia
SRR6919758	2017-09-13	1.1.2.34.2296.2850.8370	Thailand	Asia	South-eastern Asia
SRR7902697	2018-02-07	1.1.2.34.2296.2850.9375	Thailand	Asia	South-eastern Asia
SRR6897989	2017-08-30	1.1.2.34.2296.2850.9611	Thailand	Asia	South-eastern Asia
SRR7251549	2018-03-20	1.1.2.34.2296.2850.9724	Thailand	Asia	South-eastern Asia
SRR7416107	2018-05-03	1.1.2.34.2296.2850.9912	Thailand	Asia	South-eastern Asia
SRR7414869	2018-02-09	1.1.2.34.2296.4532.9482	Thailand	Asia	South-eastern Asia
SRR8509030	2018-03-16	1.1.2.34.2296.4629.9715	Thailand	Asia	South-eastern Asia
SRR8509152	2018-04-24	1.1.2.34.2296.4698.9861	Thailand	Asia	South-eastern Asia
SRR7522942	2018-07-02	1.1.2.34.2296.4829.10313	Thailand	Asia	South-eastern Asia
SRR8585003	2019-01-30	1.1.2.34.2296.5803.12697	Thailand	Asia	South-eastern Asia
SRR8704695	2019-02-21	1.1.2.34.2296.5839.12782	Thailand	Asia	South-eastern Asia
SRR8772191	2019-03-11	1.1.2.34.2296.5854.12834	Thailand	Asia	South-eastern Asia
SRR8820638	2019-03-19	1.1.2.34.2296.5862.12856	Thailand	Asia	South-eastern Asia
SRR3048902	2014-06-03	1.1.2.34.34.34.34	Thailand	Asia	South-eastern Asia
SRR8738375	2019-03-04	1.1.2.34.4102.5844.12805	Thailand	Asia	South-eastern Asia
SRR8292208	2018-11-27	1.1.2.34.687.745.12480	Thailand	Asia	South-eastern Asia
SRR1966964	2015-02-17	1.1.2.34.687.745.927	Thailand	Asia	South-eastern Asia
SRR6900189	2017-12-06	1.1.2.4.3283.4310.8995	Thailand	Asia	South-eastern Asia
SRR1968135	2015-03-31	1.1.2.403.443.455.497	Thailand	Asia	South-eastern Asia
SRR1968352	2015-02-03	1.1.2.635.882.984.1270	Thailand	Asia	South-eastern Asia
SRR3286941	2015-06-25	1.1.2.849.1723.2014.2974	Thailand	Asia	South-eastern Asia
SRR6918613	2017-12-01	1.1.2.849.3271.4295.8968	Thailand	Asia	South-eastern Asia
SRR7284412	2018-04-27	1.1.2.849.3545.4703.9874	Thailand	Asia	South-eastern Asia
SRR6924091	2017-11-13	1.1.200.491.2282.2832.8863	Thailand	Asia	South-eastern Asia
SRR6918601	2016-01-13	1.1.292.1231.2092.2540.4319	Thailand	Asia	South-eastern Asia
SRR5631948	2017-01-17	1.1.292.1231.2839.3587.6889	Thailand	Asia	South-eastern Asia
SRR6920103	2017-09-21	1.1.292.1231.3194.4134.8470	Thailand	Asia	South-eastern Asia
SRR5216186	2016-06-27	1.1.322.1300.2235.2764.4915	Thailand	Asia	South-eastern Asia
SRR5216293	2016-08-23	1.1.437.1591.2316.2886.5244	Thailand	Asia	South-eastern Asia
SRR7344646	2018-04-18	1.1.685.2420.3350.4419.9835	Thailand	Asia	South-eastern Asia
SRR5193422	2016-09-06	1.2.3.151.151.151.4817	Thailand	Asia	South-eastern Asia
SRR8839368	2019-03-20	4.142.773.2677.4114.5868.12872	Thailand	Asia	South-eastern Asia
SRR6898863	2016-09-23	4.45.257.1106.2490.3112.5753	Thailand	Asia	South-eastern Asia
SRR8490651	2018-07-04	1.1.2.1124.3595.4779.10319	Tunisia	Africa	Northern Africa
SRR7867202	2018-07-16	1.1.2.1124.3595.4779.10412	Tunisia	Africa	Northern Africa
SRR7873865	2018-07-12	1.1.2.1124.3595.4779.10416	Tunisia	Africa	Northern Africa
SRR1966356	2014-08-27	1.1.2.119.119.119.119	Tunisia	Africa	Northern Africa
SRR1958671	2014-09-24	1.1.2.28.1054.1186.1584	Tunisia	Africa	Northern Africa
SRR1969660	2014-08-08	1.1.2.28.1284.1467.1989	Tunisia	Africa	Northern Africa
SRR8638526	2019-02-04	1.1.2.28.419.444.12708	Tunisia	Africa	Northern Africa
SRR1966919	2014-05-12	1.1.2.28.419.444.1884	Tunisia	Africa	Northern Africa
SRR1966481	2014-08-01	1.1.2.28.419.444.1979	Tunisia	Africa	Northern Africa
SRR7450794	2014-09-03	1.1.2.28.419.444.754	Tunisia	Africa	Northern Africa
SRR1957974	2014-10-14	1.1.2.28.419.630.756	Tunisia	Africa	Northern Africa
SRR1960326	2014-11-13	1.1.2.28.452.466.1703	Tunisia	Africa	Northern Africa
SRR1966470	2014-09-17	1.1.2.28.725.1265.1699	Tunisia	Africa	Northern Africa
SRR1968093	2014-10-10	1.1.2.28.725.788.983	Tunisia	Africa	Northern Africa
SRR3049331	2014-10-02	1.1.2.28.877.1790.2492	Tunisia	Africa	Northern Africa
SRR1967218	2014-10-07	1.1.2.28.877.976.1256	Tunisia	Africa	Northern Africa
SRR1958251	2014-10-24	1.1.2.512.656.707.864	Tunisia	Africa	Northern Africa
SRR1958118	2014-10-08	1.1.2.96.196.196.1231	Tunisia	Africa	Northern Africa
SRR1958113	2014-09-23	1.1.2.96.196.196.1435	Tunisia	Africa	Northern Africa
SRR1966765	2014-08-08	1.1.2.96.670.1860.2601	Tunisia	Africa	Northern Africa
SRR3048760	2014-10-03	1.1.2.96.670.723.895	Tunisia	Africa	Northern Africa
SRR5216513	2015-06-08	1.1.2.96.96.1983.2902	Tunisia	Africa	Northern Africa
SRR1967572	2014-08-04	1.1.2.96.96.96.96	Tunisia	Africa	Northern Africa
SRR6922682	2016-11-15	1.2.3.151.356.372.6293	Tunisia	Africa	Northern Africa
SRR1966532	2014-09-29	1.2.3.18.364.1101.1467	Tunisia	Africa	Northern Africa
SRR1960319	2014-09-22	1.2.3.18.364.1101.1983	Tunisia	Africa	Northern Africa
SRR1966718	2014-10-21	1.2.3.18.364.410.426	Tunisia	Africa	Northern Africa
SRR1965041	2014-10-08	1.2.3.18.369.371.1306	Tunisia	Africa	Northern Africa
SRR1960237	2014-11-13	1.2.3.18.369.371.2242	Tunisia	Africa	Northern Africa
SRR1967928	2014-09-18	1.2.3.18.369.371.430	Tunisia	Africa	Northern Africa
SRR1965117	2014-08-19	1.2.3.18.369.371.498	Tunisia	Africa	Northern Africa
SRR1965128	2014-09-16	1.2.3.18.369.513.578	Tunisia	Africa	Northern Africa
SRR1966022	2014-09-30	1.2.3.18.369.517.584	Tunisia	Africa	Northern Africa
SRR7873883	2018-08-08	1.2.3.18.369.5321.11363	Tunisia	Africa	Northern Africa
SRR7842451	2018-08-16	1.2.3.18.369.5361.11455	Tunisia	Africa	Northern Africa
SRR1969229	2014-07-24	1.2.3.18.38.38.393	Tunisia	Africa	Northern Africa
SRR3049544	2014-07-16	1.2.3.18.432.443.1736	Tunisia	Africa	Northern Africa
SRR1966071	2014-07-04	1.2.3.18.432.742.1199	Tunisia	Africa	Northern Africa
SRR1968440	2014-07-02	1.2.3.18.432.742.1244	Tunisia	Africa	Northern Africa
SRR1966534	2014-08-15	1.2.3.18.516.537.1648	Tunisia	Africa	Northern Africa
SRR1967243	2014-10-29	1.2.3.18.516.537.619	Tunisia	Africa	Northern Africa
SRR1969881	2014-11-06	1.2.3.18.990.1113.1485	Tunisia	Africa	Northern Africa
SRR8149186	2018-10-24	1.1.2.1161.1926.5676.12277	Turkey	Asia	Western Asia
SRR7450844	2018-06-20	1.1.2.12.12.590.10082	Turkey	Asia	Western Asia
SRR5216339	2016-07-04	1.1.2.1256.2146.2617.4902	Turkey	Asia	Western Asia
SRR5220537	2016-08-18	1.1.2.1256.2146.2617.5159	Turkey	Asia	Western Asia
SRR6900734	2016-08-23	1.1.2.1256.2146.2617.5199	Turkey	Asia	Western Asia
SRR6900464	2016-08-25	1.1.2.1256.2146.2617.5214	Turkey	Asia	Western Asia
SRR5194206	2016-11-03	1.1.2.1256.2146.2617.6245	Turkey	Asia	Western Asia
SRR6921985	2017-10-17	1.1.2.1256.2146.2617.8672	Turkey	Asia	Western Asia
SRR6924156	2017-11-29	1.1.2.1256.2146.2617.8938	Turkey	Asia	Western Asia
SRR1957978	2014-09-25	1.1.2.1326.1041.1173.1565	Turkey	Asia	Western Asia
SRR5220554	2015-09-29	1.1.2.1326.1904.2274.3659	Turkey	Asia	Western Asia
SRR7450853	2018-05-30	1.1.2.1326.2022.2792.10015	Turkey	Asia	Western Asia
SRR7475341	2018-05-30	1.1.2.1326.2022.2792.10037	Turkey	Asia	Western Asia
SRR7867109	2018-08-14	1.1.2.1326.2022.2792.11405	Turkey	Asia	Western Asia
SRR7841477	2018-08-17	1.1.2.1326.2022.2792.11451	Turkey	Asia	Western Asia
SRR7879669	2018-08-20	1.1.2.1326.2022.2792.11469	Turkey	Asia	Western Asia
SRR8325497	2018-09-18	1.1.2.1326.2022.2792.11527	Turkey	Asia	Western Asia
SRR8492436	2018-08-29	1.1.2.1326.2022.2792.11538	Turkey	Asia	Western Asia
SRR7842632	2018-09-05	1.1.2.1326.2022.2792.11637	Turkey	Asia	Western Asia
SRR7997191	2018-09-10	1.1.2.1326.2022.2792.11693	Turkey	Asia	Western Asia
SRR7998246	2018-09-21	1.1.2.1326.2022.2792.11924	Turkey	Asia	Western Asia
SRR8201805	2018-11-06	1.1.2.1326.2022.2792.12381	Turkey	Asia	Western Asia
SRR8204052	2018-11-07	1.1.2.1326.2022.2792.12389	Turkey	Asia	Western Asia
SRR5193910	2016-07-19	1.1.2.1326.2022.2792.5004	Turkey	Asia	Western Asia
SRR6898104	2017-07-26	1.1.2.1326.2022.3958.7830	Turkey	Asia	Western Asia
SRR5193853	2016-07-13	1.1.2.1326.2247.2781.4976	Turkey	Asia	Western Asia
SRR6898878	2016-07-28	1.1.2.1326.2247.2781.5037	Turkey	Asia	Western Asia
SRR6921971	2016-08-31	1.1.2.1326.2247.2781.5258	Turkey	Asia	Western Asia
SRR5216494	2016-11-08	1.1.2.1326.2247.2781.6260	Turkey	Asia	Western Asia
SRR6921949	2017-05-03	1.1.2.1326.2247.2781.7232	Turkey	Asia	Western Asia
SRR5215760	2016-07-21	1.1.2.1326.393.2719.5000	Turkey	Asia	Western Asia
SRR1958381	2014-09-01	1.1.2.1326.447.461.1171	Turkey	Asia	Western Asia
SRR1966579	2014-07-30	1.1.2.1326.447.461.1600	Turkey	Asia	Western Asia
SRR1958367	2014-09-22	1.1.2.1326.447.461.1691	Turkey	Asia	Western Asia
SRR1967004	2014-08-27	1.1.2.1326.447.461.2049	Turkey	Asia	Western Asia
SRR1969533	2014-09-16	1.1.2.1326.447.461.504	Turkey	Asia	Western Asia
SRR6919238	2016-08-31	1.1.2.1326.447.461.5262	Turkey	Asia	Western Asia
SRR6922739	2016-10-06	1.1.2.1326.447.461.5512	Turkey	Asia	Western Asia
SRR5194196	2016-09-13	1.1.2.1326.447.461.5650	Turkey	Asia	Western Asia
SRR5193223	2016-09-26	1.1.2.1326.447.461.5738	Turkey	Asia	Western Asia
SRR8661097	2016-10-12	1.1.2.1326.447.461.5942	Turkey	Asia	Western Asia
SRR6901173	2017-06-13	1.1.2.1326.447.461.7554	Turkey	Asia	Western Asia
SRR6924159	2017-06-27	1.1.2.1326.447.461.7654	Turkey	Asia	Western Asia
SRR6920120	2017-10-03	1.1.2.1326.447.461.8557	Turkey	Asia	Western Asia
SRR7157822	2015-09-11	1.1.2.1326.510.531.4291	Turkey	Asia	Western Asia
SRR1963286	2014-09-22	1.1.2.1326.510.531.607	Turkey	Asia	Western Asia
SRR7538877	2015-06-11	1.1.2.1326.838.1989.2916	Turkey	Asia	Western Asia
SRR7456864	2015-06-29	1.1.2.1326.838.1989.3009	Turkey	Asia	Western Asia
SRR7285751	2015-07-09	1.1.2.1326.838.1989.3059	Turkey	Asia	Western Asia
SRR8724939	2015-07-08	1.1.2.1326.838.1989.3083	Turkey	Asia	Western Asia
SRR1966646	2014-07-14	1.1.2.1326.838.930.1194	Turkey	Asia	Western Asia
SRR1968252	2014-05-13	1.1.2.1326.838.930.1766	Turkey	Asia	Western Asia
SRR7090694	2015-06-15	1.1.2.1326.838.930.2936	Turkey	Asia	Western Asia
SRR5220197	2015-08-11	1.1.2.1326.838.930.3265	Turkey	Asia	Western Asia
SRR8711760	2015-08-28	1.1.2.1326.838.930.3406	Turkey	Asia	Western Asia
SRR8711835	2015-09-09	1.1.2.1326.838.930.3435	Turkey	Asia	Western Asia
SRR5220218	2015-09-01	1.1.2.1326.838.930.3500	Turkey	Asia	Western Asia
SRR7310568	2015-12-16	1.1.2.1326.838.930.4215	Turkey	Asia	Western Asia
SRR5193256	2016-08-16	1.1.2.1326.838.930.5152	Turkey	Asia	Western Asia
SRR5193828	2016-09-01	1.1.2.1326.838.930.5462	Turkey	Asia	Western Asia
SRR7285796	2015-06-16	1.1.2.1326.928.1039.2944	Turkey	Asia	Western Asia
SRR7286850	2015-06-18	1.1.2.1326.928.1039.2980	Turkey	Asia	Western Asia
SRR3286933	2015-06-29	1.1.2.1326.928.1039.3018	Turkey	Asia	Western Asia
SRR1958134	2014-10-14	1.1.2.139.139.139.1888	Turkey	Asia	Western Asia
SRR1958254	2014-09-23	1.1.2.158.158.158.158	Turkey	Asia	Western Asia
SRR5216054	2016-09-01	1.1.2.1659.2406.2999.5439	Turkey	Asia	Western Asia
SRR5216561	2016-06-14	1.1.2.1711.1347.2737.4842	Turkey	Asia	Western Asia
SRR6900161	2016-06-28	1.1.2.1711.1347.2737.4864	Turkey	Asia	Western Asia
SRR6900957	2016-07-22	1.1.2.1711.1347.2737.5029	Turkey	Asia	Western Asia
SRR8492273	2018-06-01	1.1.2.1711.2003.2405.10020	Turkey	Asia	Western Asia
SRR7523071	2018-07-03	1.1.2.1711.2003.2405.10332	Turkey	Asia	Western Asia
SRR7842440	2018-08-23	1.1.2.1711.2003.2405.11428	Turkey	Asia	Western Asia
SRR7867210	2018-08-22	1.1.2.1711.2003.2405.11487	Turkey	Asia	Western Asia
SRR8239942	2018-09-17	1.1.2.1711.2003.2405.11759	Turkey	Asia	Western Asia
SRR8492456	2018-09-27	1.1.2.1711.2003.2405.12041	Turkey	Asia	Western Asia
SRR8087231	2018-10-05	1.1.2.1711.2003.2405.12113	Turkey	Asia	Western Asia
SRR5216167	2016-06-27	1.1.2.1711.2003.2405.4905	Turkey	Asia	Western Asia
SRR5220550	2016-08-30	1.1.2.1711.2003.2405.5349	Turkey	Asia	Western Asia
SRR5193919	2016-09-21	1.1.2.1711.2003.2405.5708	Turkey	Asia	Western Asia
SRR5193616	2016-09-26	1.1.2.1711.2003.2405.5770	Turkey	Asia	Western Asia
SRR5216192	2016-10-19	1.1.2.1711.2003.2405.5933	Turkey	Asia	Western Asia
SRR6918896	2016-10-17	1.1.2.1711.2003.2405.5960	Turkey	Asia	Western Asia
SRR5220464	2016-11-03	1.1.2.1711.2003.2405.6244	Turkey	Asia	Western Asia
SRR6900478	2016-11-22	1.1.2.1711.2003.2405.6333	Turkey	Asia	Western Asia
SRR6919167	2017-08-07	1.1.2.1711.2003.2405.7820	Turkey	Asia	Western Asia
SRR7533351	2018-07-04	1.1.2.1711.50.50.10326	Turkey	Asia	Western Asia
SRR1970279	2014-07-03	1.1.2.1711.50.50.50	Turkey	Asia	Western Asia
SRR8548724	2017-08-15	1.1.2.1711.50.50.7964	Turkey	Asia	Western Asia
SRR6920021	2017-08-23	1.1.2.1711.50.50.8153	Turkey	Asia	Western Asia
SRR6922786	2017-09-14	1.1.2.1711.50.50.8371	Turkey	Asia	Western Asia
SRR1967455	2014-08-27	1.1.2.1712.1457.1680.2312	Turkey	Asia	Western Asia
SRR3284720	2015-09-18	1.1.2.1712.1870.2222.3518	Turkey	Asia	Western Asia
SRR7426866	2015-09-29	1.1.2.1712.1927.2304.3730	Turkey	Asia	Western Asia
SRR6900951	2016-09-20	1.1.2.1712.2488.3110.5724	Turkey	Asia	Western Asia
SRR8300578	2018-08-30	1.1.2.1712.3863.5393.11559	Turkey	Asia	Western Asia
SRR5216156	2015-09-21	1.1.2.1712.475.2032.3577	Turkey	Asia	Western Asia
SRR8201789	2018-11-02	1.1.2.1712.475.3156.12369	Turkey	Asia	Western Asia
SRR8201826	2018-11-06	1.1.2.1712.475.3156.12373	Turkey	Asia	Western Asia
SRR8204039	2018-11-07	1.1.2.1712.475.3156.12385	Turkey	Asia	Western Asia
SRR6919852	2016-10-07	1.1.2.1712.475.3156.5913	Turkey	Asia	Western Asia
SRR5216372	2015-11-16	1.1.2.1712.475.492.4062	Turkey	Asia	Western Asia
SRR5220835	2015-11-23	1.1.2.1712.475.492.4084	Turkey	Asia	Western Asia
SRR1967903	2014-08-06	1.1.2.1712.475.492.759	Turkey	Asia	Western Asia
SRR1966344	2014-08-18	1.1.2.1712.475.492.875	Turkey	Asia	Western Asia
SRR5220872	2015-08-28	1.1.2.1712.58.2133.3352	Turkey	Asia	Western Asia
SRR5216280	2016-05-31	1.1.2.1712.58.2133.4722	Turkey	Asia	Western Asia
SRR5216521	2016-06-22	1.1.2.1712.58.2133.4810	Turkey	Asia	Western Asia
SRR5583161	2017-05-03	1.1.2.1712.58.2133.7231	Turkey	Asia	Western Asia
SRR5216346	2015-08-26	1.1.2.1712.58.2162.3369	Turkey	Asia	Western Asia
SRR5220534	2015-09-23	1.1.2.1712.58.2226.3525	Turkey	Asia	Western Asia
SRR5193534	2016-11-08	1.1.2.1712.58.3273.6265	Turkey	Asia	Western Asia
SRR5220489	2015-05-12	1.1.2.1712.58.370.2811	Turkey	Asia	Western Asia
SRR7369164	2015-07-29	1.1.2.1712.58.370.3192	Turkey	Asia	Western Asia
SRR5216554	2015-10-20	1.1.2.1712.58.370.3873	Turkey	Asia	Western Asia
SRR6899267	2016-08-02	1.1.2.1712.58.370.5078	Turkey	Asia	Western Asia
SRR5215767	2016-09-07	1.1.2.1712.58.370.5591	Turkey	Asia	Western Asia
SRR6920009	2017-10-02	1.1.2.1712.58.370.8549	Turkey	Asia	Western Asia
SRR3048784	2014-08-22	1.1.2.1712.58.566.665	Turkey	Asia	Western Asia
SRR1970143	2014-07-30	1.1.2.1712.58.570.1866	Turkey	Asia	Western Asia
SRR5215754	2015-09-28	1.1.2.1712.58.570.3683	Turkey	Asia	Western Asia
SRR3049891	2014-12-04	1.1.2.1712.58.570.680	Turkey	Asia	Western Asia
SRR1966074	2014-10-07	1.1.2.1712.912.1021.1338	Turkey	Asia	Western Asia
SRR1967522	2014-10-03	1.1.2.1712.926.1037.1367	Turkey	Asia	Western Asia
SRR1965488	2014-08-12	1.1.2.1712.926.1263.1696	Turkey	Asia	Western Asia
SRR1966568	2014-06-27	1.1.2.1714.48.48.48	Turkey	Asia	Western Asia
SRR1969482	2014-11-05	1.1.2.1714.513.534.615	Turkey	Asia	Western Asia
SRR1966690	2014-09-19	1.1.2.176.176.176.176	Turkey	Asia	Western Asia
SRR8131536	2018-09-14	1.1.2.1804.3890.5444.11740	Turkey	Asia	Western Asia
SRR1967009	2014-08-08	1.1.2.19.19.448.2640	Turkey	Asia	Western Asia
SRR1966940	2014-06-20	1.1.2.19.19.448.902	Turkey	Asia	Western Asia
SRR1967313	2014-07-22	1.1.2.19.19.515.580	Turkey	Asia	Western Asia
SRR1958419	2014-10-16	1.1.2.209.209.209.1237	Turkey	Asia	Western Asia
SRR1968935	2014-10-21	1.1.2.209.209.209.209	Turkey	Asia	Western Asia
SRR6901006	2017-09-05	1.1.2.2241.3159.4075.8277	Turkey	Asia	Western Asia
SRR6918309	2017-09-05	1.1.2.2341.3160.4076.8281	Turkey	Asia	Western Asia
SRR7458744	2018-05-30	1.1.2.28.149.149.10058	Turkey	Asia	Western Asia
SRR7458177	2018-06-19	1.1.2.28.149.149.10152	Turkey	Asia	Western Asia
SRR7480299	2018-06-21	1.1.2.28.149.149.10171	Turkey	Asia	Western Asia
SRR7480387	2018-06-27	1.1.2.28.149.149.10180	Turkey	Asia	Western Asia
SRR7495584	2018-06-25	1.1.2.28.149.149.10191	Turkey	Asia	Western Asia
SRR7850622	2018-07-11	1.1.2.28.149.149.10389	Turkey	Asia	Western Asia
SRR7828462	2018-08-06	1.1.2.28.149.149.10419	Turkey	Asia	Western Asia
SRR7902693	2018-09-13	1.1.2.28.149.149.11417	Turkey	Asia	Western Asia
SRR7866896	2018-09-03	1.1.2.28.149.149.11420	Turkey	Asia	Western Asia
SRR8399307	2018-12-18	1.1.2.28.149.149.11650	Turkey	Asia	Western Asia
SRR7997072	2018-09-19	1.1.2.28.149.149.11821	Turkey	Asia	Western Asia
SRR8087138	2018-09-27	1.1.2.28.149.149.12019	Turkey	Asia	Western Asia
SRR8272584	2018-09-27	1.1.2.28.149.149.12029	Turkey	Asia	Western Asia
SRR8087242	2018-10-01	1.1.2.28.149.149.12044	Turkey	Asia	Western Asia
SRR8084331	2018-10-02	1.1.2.28.149.149.12070	Turkey	Asia	Western Asia
SRR8084247	2018-10-02	1.1.2.28.149.149.12080	Turkey	Asia	Western Asia
SRR8204756	2018-10-03	1.1.2.28.149.149.12107	Turkey	Asia	Western Asia
SRR8084308	2018-10-09	1.1.2.28.149.149.12147	Turkey	Asia	Western Asia
SRR8297316	2018-08-28	1.1.2.28.149.149.12281	Turkey	Asia	Western Asia
SRR8137418	2018-10-17	1.1.2.28.149.149.12283	Turkey	Asia	Western Asia
SRR8172829	2018-10-26	1.1.2.28.149.149.12305	Turkey	Asia	Western Asia
SRR8204752	2018-10-29	1.1.2.28.149.149.12320	Turkey	Asia	Western Asia
SRR8775490	2019-03-13	1.1.2.28.149.149.12849	Turkey	Asia	Western Asia
SRR7350851	2015-06-18	1.1.2.28.149.149.149	Turkey	Asia	Western Asia
SRR3285404	2015-04-21	1.1.2.28.149.149.2745	Turkey	Asia	Western Asia
SRR3284837	2015-04-28	1.1.2.28.149.149.2749	Turkey	Asia	Western Asia
SRR5193402	2015-06-08	1.1.2.28.149.149.2898	Turkey	Asia	Western Asia
SRR5193417	2015-06-08	1.1.2.28.149.149.2904	Turkey	Asia	Western Asia
SRR5220707	2015-06-11	1.1.2.28.149.149.2908	Turkey	Asia	Western Asia
SRR5215823	2015-06-11	1.1.2.28.149.149.2929	Turkey	Asia	Western Asia
SRR5220886	2015-07-01	1.1.2.28.149.149.3002	Turkey	Asia	Western Asia
SRR7444046	2015-06-30	1.1.2.28.149.149.3038	Turkey	Asia	Western Asia
SRR5220196	2015-07-16	1.1.2.28.149.149.3145	Turkey	Asia	Western Asia
SRR5194201	2015-07-21	1.1.2.28.149.149.3161	Turkey	Asia	Western Asia
SRR7284472	2015-07-21	1.1.2.28.149.149.3162	Turkey	Asia	Western Asia
SRR7223181	2016-08-04	1.1.2.28.149.149.3255	Turkey	Asia	Western Asia
SRR7962271	2015-08-25	1.1.2.28.149.149.3347	Turkey	Asia	Western Asia
SRR5193838	2015-10-20	1.1.2.28.149.149.3870	Turkey	Asia	Western Asia
SRR5194049	2015-11-03	1.1.2.28.149.149.4018	Turkey	Asia	Western Asia
SRR6920102	2016-06-24	1.1.2.28.149.149.4877	Turkey	Asia	Western Asia
SRR6898812	2017-07-04	1.1.2.28.149.149.7688	Turkey	Asia	Western Asia
SRR6898409	2017-07-12	1.1.2.28.149.149.7781	Turkey	Asia	Western Asia
SRR6897828	2017-07-27	1.1.2.28.149.149.7811	Turkey	Asia	Western Asia
SRR6897666	2017-07-19	1.1.2.28.149.149.7826	Turkey	Asia	Western Asia
SRR7480133	2017-08-15	1.1.2.28.149.149.7874	Turkey	Asia	Western Asia
SRR6919805	2017-08-04	1.1.2.28.149.149.7916	Turkey	Asia	Western Asia
SRR6900278	2017-07-31	1.1.2.28.149.149.8065	Turkey	Asia	Western Asia
SRR6898827	2017-08-23	1.1.2.28.149.149.8158	Turkey	Asia	Western Asia
SRR6921908	2017-08-22	1.1.2.28.149.149.8187	Turkey	Asia	Western Asia
SRR6919215	2017-08-16	1.1.2.28.149.149.8193	Turkey	Asia	Western Asia
SRR6898473	2017-09-18	1.1.2.28.149.149.8372	Turkey	Asia	Western Asia
SRR6919976	2017-09-15	1.1.2.28.149.149.8381	Turkey	Asia	Western Asia
SRR6918858	2017-10-04	1.1.2.28.149.149.8594	Turkey	Asia	Western Asia
SRR6899271	2017-10-18	1.1.2.28.149.149.8687	Turkey	Asia	Western Asia
SRR6921975	2017-10-23	1.1.2.28.149.149.8726	Turkey	Asia	Western Asia
SRR6924136	2017-11-29	1.1.2.28.149.149.8940	Turkey	Asia	Western Asia
SRR6898833	2017-08-30	1.1.2.28.149.149.9597	Turkey	Asia	Western Asia
SRR5220540	2015-06-09	1.1.2.28.149.1986.2911	Turkey	Asia	Western Asia
SRR8724640	2015-06-17	1.1.2.28.149.2008.2957	Turkey	Asia	Western Asia
SRR1968048	2014-07-29	1.1.2.28.149.926.1189	Turkey	Asia	Western Asia
SRR5216348	2015-07-27	1.1.2.28.1761.2070.3164	Turkey	Asia	Western Asia
SRR7867161	2018-07-31	1.1.2.28.3641.4889.10550	Turkey	Asia	Western Asia
SRR3049060	2014-06-17	1.1.2.28.387.390.401	Turkey	Asia	Western Asia
SRR6920101	2016-12-06	1.1.2.29.2627.3319.6419	Turkey	Asia	Western Asia
SRR8717171	2015-08-19	1.1.2.29.29.2132.3309	Turkey	Asia	Western Asia
SRR1965336	2014-05-20	1.1.2.29.29.29.29	Turkey	Asia	Western Asia
SRR3049665	2014-06-10	1.1.2.29.29.29.491	Turkey	Asia	Western Asia
SRR7828426	2018-08-09	1.1.2.29.29.5338.11397	Turkey	Asia	Western Asia
SRR7850538	2018-08-13	1.1.2.29.29.5338.11413	Turkey	Asia	Western Asia
SRR7903094	2018-08-22	1.1.2.29.29.5338.11478	Turkey	Asia	Western Asia
SRR5194023	2016-11-04	1.1.2.29.937.1049.6228	Turkey	Asia	Western Asia
SRR3048858	2014-06-04	1.1.2.48.598.638.771	Turkey	Asia	Western Asia
SRR7191862	2015-11-03	1.1.2.63.63.63.3992	Turkey	Asia	Western Asia
SRR3049473	2014-07-21	1.1.2.65.65.65.65	Turkey	Asia	Western Asia
SRR5193905	2016-08-30	1.1.2.80.1946.2988.5425	Turkey	Asia	Western Asia
SRR6900846	2017-07-31	1.1.2.80.453.467.7980	Turkey	Asia	Western Asia
SRR7439485	2015-09-22	1.1.540.2067.2883.3657.3692	Turkey	Asia	Western Asia
SRR7523769	2015-10-13	1.1.540.2067.2883.3657.3704	Turkey	Asia	Western Asia
SRR6899436	2016-09-06	1.1.540.2067.2883.3657.5528	Turkey	Asia	Western Asia
SRR6924120	2016-10-26	1.1.540.2067.2883.3657.6093	Turkey	Asia	Western Asia
SRR6919043	2017-06-05	1.1.540.2067.2883.3657.7426	Turkey	Asia	Western Asia
SRR6900148	2017-06-13	1.1.540.2067.2883.3657.7544	Turkey	Asia	Western Asia
SRR8304794	2018-08-21	1.1.540.2067.2883.5353.11434	Turkey	Asia	Western Asia
SRR8272633	2018-09-07	1.1.540.2067.2883.5353.11656	Turkey	Asia	Western Asia
SRR1968089	2014-09-09	1.11.82.135.135.135.135	Turkey	Asia	Western Asia
SRR7516257	2018-06-28	1.2.270.2317.3556.4720.10284	Turkey	Asia	Western Asia
SRR8249754	2018-11-15	1.2.270.2317.3556.4720.12446	Turkey	Asia	Western Asia
SRR7841372	2018-08-10	1.2.270.2317.3556.5334.11389	Turkey	Asia	Western Asia
SRR7850530	2018-08-14	1.2.270.2317.3556.5334.11403	Turkey	Asia	Western Asia
SRR8333797	2018-08-15	1.2.270.2317.3556.5334.11474	Turkey	Asia	Western Asia
SRR7903058	2018-09-11	1.2.270.2317.3556.5334.11525	Turkey	Asia	Western Asia
SRR8293775	2018-09-04	1.2.270.2317.3556.5334.11592	Turkey	Asia	Western Asia
SRR7962279	2018-09-19	1.2.270.2317.3556.5334.11719	Turkey	Asia	Western Asia
SRR8204780	2018-10-16	1.2.270.2317.3556.5334.12191	Turkey	Asia	Western Asia
SRR7523798	2015-09-17	1.2.3.151.151.783.2809	Turkey	Asia	Western Asia
SRR7523124	2018-07-02	1.2.3.151.3522.4653.10135	Turkey	Asia	Western Asia
SRR5216536	2016-11-17	1.2.3.151.356.372.6293	Turkey	Asia	Western Asia
SRR1962576	2014-11-18	1.2.3.18.1338.1534.2089	Turkey	Asia	Western Asia
SRR4063719	2015-07-14	1.2.3.18.1755.2061.3135	Turkey	Asia	Western Asia
SRR6900710	2017-08-22	1.2.3.18.1755.4051.8179	Turkey	Asia	Western Asia
SRR7527826	2015-09-08	1.2.3.18.180.180.10869	Turkey	Asia	Western Asia
SRR6899339	2017-08-17	1.2.3.18.180.180.10885	Turkey	Asia	Western Asia
SRR6899308	2016-06-29	1.2.3.18.180.180.10897	Turkey	Asia	Western Asia
SRR7284432	2015-09-18	1.2.3.18.180.180.11054	Turkey	Asia	Western Asia
SRR5220854	2015-10-07	1.2.3.18.180.180.11139	Turkey	Asia	Western Asia
SRR8705985	2015-10-15	1.2.3.18.180.180.11142	Turkey	Asia	Western Asia
SRR6920736	2017-09-12	1.2.3.18.180.180.11159	Turkey	Asia	Western Asia
SRR5193539	2016-07-12	1.2.3.18.180.180.11226	Turkey	Asia	Western Asia
SRR6919165	2017-12-06	1.2.3.18.180.180.11280	Turkey	Asia	Western Asia
SRR6922071	2016-08-26	1.2.3.18.180.180.11286	Turkey	Asia	Western Asia
SRR6919791	2017-08-23	1.2.3.18.180.180.11287	Turkey	Asia	Western Asia
SRR8490782	2018-09-12	1.2.3.18.180.180.11706	Turkey	Asia	Western Asia
SRR8182953	2018-10-24	1.2.3.18.180.180.12273	Turkey	Asia	Western Asia
SRR1969107	2014-11-13	1.2.3.18.180.5110.10833	Turkey	Asia	Western Asia
SRR7842629	2018-08-30	1.2.3.18.180.5398.11564	Turkey	Asia	Western Asia
SRR7962299	2018-09-17	1.2.3.18.180.5398.11754	Turkey	Asia	Western Asia
SRR5220754	2015-10-02	1.2.3.18.1936.2319.3762	Turkey	Asia	Western Asia
SRR6898073	2017-07-11	1.2.3.18.1979.2369.7782	Turkey	Asia	Western Asia
SRR5215758	2016-05-04	1.2.3.18.2180.2669.4650	Turkey	Asia	Western Asia
SRR7873972	2018-07-20	1.2.3.18.2180.4874.10505	Turkey	Asia	Western Asia
SRR6900879	2016-06-22	1.2.3.18.2223.2744.4861	Turkey	Asia	Western Asia
SRR5220672	2016-08-31	1.2.3.18.2440.3042.5515	Turkey	Asia	Western Asia
SRR5194219	2016-09-06	1.2.3.18.2445.3047.5539	Turkey	Asia	Western Asia
SRR6919263	2016-09-08	1.2.3.18.2445.3047.5562	Turkey	Asia	Western Asia
SRR5194312	2016-09-12	1.2.3.18.2445.3047.5633	Turkey	Asia	Western Asia
SRR6900927	2016-10-06	1.2.3.18.2445.3047.5897	Turkey	Asia	Western Asia
SRR5215630	2016-10-11	1.2.3.18.2445.3047.5925	Turkey	Asia	Western Asia
SRR5193723	2016-10-11	1.2.3.18.2445.3047.5928	Turkey	Asia	Western Asia
SRR5194333	2016-09-07	1.2.3.18.2445.3051.5547	Turkey	Asia	Western Asia
SRR7475284	2018-05-30	1.2.3.18.3094.3949.10063	Turkey	Asia	Western Asia
SRR6897021	2017-08-03	1.2.3.18.3094.3949.7793	Turkey	Asia	Western Asia
SRR6922626	2017-07-19	1.2.3.18.3094.3949.8022	Turkey	Asia	Western Asia
SRR7349209	2018-05-29	1.2.3.18.3097.3953.10041	Turkey	Asia	Western Asia
SRR8492395	2018-06-05	1.2.3.18.3097.3953.10087	Turkey	Asia	Western Asia
SRR8445028	2018-07-05	1.2.3.18.3097.3953.10335	Turkey	Asia	Western Asia
SRR7879561	2018-07-11	1.2.3.18.3097.3953.10387	Turkey	Asia	Western Asia
SRR7866994	2018-07-17	1.2.3.18.3097.3953.10440	Turkey	Asia	Western Asia
SRR8131581	2018-09-18	1.2.3.18.3097.3953.10470	Turkey	Asia	Western Asia
SRR7903068	2018-09-12	1.2.3.18.3097.3953.11697	Turkey	Asia	Western Asia
SRR8087245	2018-10-02	1.2.3.18.3097.3953.12061	Turkey	Asia	Western Asia
SRR6899421	2017-08-18	1.2.3.18.3097.3953.8151	Turkey	Asia	Western Asia
SRR6900921	2017-10-17	1.2.3.18.3097.3953.8674	Turkey	Asia	Western Asia
SRR6897947	2017-08-08	1.2.3.18.3099.3963.7845	Turkey	Asia	Western Asia
SRR6920159	2017-08-31	1.2.3.18.3155.4068.8254	Turkey	Asia	Western Asia
SRR6897664	2017-10-12	1.2.3.18.3223.4188.8644	Turkey	Asia	Western Asia
SRR6921931	2017-11-06	1.2.3.18.3247.4236.8791	Turkey	Asia	Western Asia
SRR1957763	2014-09-10	1.2.3.18.353.1017.1320	Turkey	Asia	Western Asia
SRR1969011	2014-05-29	1.2.3.18.353.1112.1483	Turkey	Asia	Western Asia
SRR1957762	2014-09-10	1.2.3.18.353.1123.1496	Turkey	Asia	Western Asia
SRR3048861	2014-06-04	1.2.3.18.353.1172.1564	Turkey	Asia	Western Asia
SRR3048836	2014-10-02	1.2.3.18.353.1246.1675	Turkey	Asia	Western Asia
SRR1965514	2014-07-01	1.2.3.18.353.1340.1808	Turkey	Asia	Western Asia
SRR8724711	2015-07-29	1.2.3.18.353.1340.3199	Turkey	Asia	Western Asia
SRR1966309	2014-09-11	1.2.3.18.353.1468.2068	Turkey	Asia	Western Asia
SRR7468867	2015-08-04	1.2.3.18.353.1468.3163	Turkey	Asia	Western Asia
SRR5215620	2015-07-07	1.2.3.18.353.1744.2976	Turkey	Asia	Western Asia
SRR7292844	2015-07-21	1.2.3.18.353.1744.3160	Turkey	Asia	Western Asia
SRR5194197	2015-07-27	1.2.3.18.353.1744.3177	Turkey	Asia	Western Asia
SRR7358937	2015-08-11	1.2.3.18.353.1744.3291	Turkey	Asia	Western Asia
SRR5220437	2015-08-14	1.2.3.18.353.1744.3321	Turkey	Asia	Western Asia
SRR7480281	2015-11-03	1.2.3.18.353.1744.3994	Turkey	Asia	Western Asia
SRR7439501	2015-09-08	1.2.3.18.353.1744.4281	Turkey	Asia	Western Asia
SRR6900990	2016-06-21	1.2.3.18.353.1744.4858	Turkey	Asia	Western Asia
SRR1959484	2014-09-22	1.2.3.18.353.1843.2575	Turkey	Asia	Western Asia
SRR5220941	2015-06-18	1.2.3.18.353.2009.2958	Turkey	Asia	Western Asia
SRR8724785	2015-06-26	1.2.3.18.353.2030.3021	Turkey	Asia	Western Asia
SRR5220603	2015-09-30	1.2.3.18.353.2030.3691	Turkey	Asia	Western Asia
SRR8705989	2015-10-06	1.2.3.18.353.2030.3742	Turkey	Asia	Western Asia
SRR6921948	2016-10-19	1.2.3.18.353.2030.6049	Turkey	Asia	Western Asia
SRR5220662	2015-07-28	1.2.3.18.353.2081.3195	Turkey	Asia	Western Asia
SRR7527780	2015-08-20	1.2.3.18.353.2081.3310	Turkey	Asia	Western Asia
SRR5220759	2015-08-20	1.2.3.18.353.2081.3311	Turkey	Asia	Western Asia
SRR8711380	2015-09-08	1.2.3.18.353.2081.3472	Turkey	Asia	Western Asia
SRR5193522	2015-09-09	1.2.3.18.353.2081.3508	Turkey	Asia	Western Asia
SRR8711623	2015-09-04	1.2.3.18.353.2081.3546	Turkey	Asia	Western Asia
SRR7443924	2015-09-15	1.2.3.18.353.2081.3635	Turkey	Asia	Western Asia
SRR7867057	2018-08-09	1.2.3.18.353.2111.11378	Turkey	Asia	Western Asia
SRR7828371	2018-08-29	1.2.3.18.353.2111.11492	Turkey	Asia	Western Asia
SRR7850459	2018-08-31	1.2.3.18.353.2111.11534	Turkey	Asia	Western Asia
SRR8114886	2018-09-28	1.2.3.18.353.2111.12046	Turkey	Asia	Western Asia
SRR8166236	2018-10-16	1.2.3.18.353.2111.12213	Turkey	Asia	Western Asia
SRR8142758	2018-10-18	1.2.3.18.353.2111.12214	Turkey	Asia	Western Asia
SRR8137419	2018-10-17	1.2.3.18.353.2111.12225	Turkey	Asia	Western Asia
SRR8149430	2018-10-24	1.2.3.18.353.2111.12271	Turkey	Asia	Western Asia
SRR5220424	2016-10-26	1.2.3.18.353.2111.6103	Turkey	Asia	Western Asia
SRR7157809	2015-08-12	1.2.3.18.353.2115.3282	Turkey	Asia	Western Asia
SRR5193871	2016-09-13	1.2.3.18.353.2128.5668	Turkey	Asia	Western Asia
SRR5216286	2016-09-20	1.2.3.18.353.2128.5980	Turkey	Asia	Western Asia
SRR4063718	2015-09-14	1.2.3.18.353.2236.3552	Turkey	Asia	Western Asia
SRR4063754	2015-10-06	1.2.3.18.353.2293.3706	Turkey	Asia	Western Asia
SRR5220851	2015-11-09	1.2.3.18.353.2413.3977	Turkey	Asia	Western Asia
SRR4063734	2015-11-09	1.2.3.18.353.2415.3982	Turkey	Asia	Western Asia
SRR7828377	2018-08-31	1.2.3.18.353.2461.10481	Turkey	Asia	Western Asia
SRR8149126	2018-10-22	1.2.3.18.353.2461.12264	Turkey	Asia	Western Asia
SRR8172823	2018-10-26	1.2.3.18.353.2461.12304	Turkey	Asia	Western Asia
SRR5220433	2015-08-25	1.2.3.18.353.2861.3356	Turkey	Asia	Western Asia
SRR5220503	2015-09-03	1.2.3.18.353.2861.3411	Turkey	Asia	Western Asia
SRR5216231	2016-08-25	1.2.3.18.353.2864.5204	Turkey	Asia	Western Asia
SRR7850659	2018-08-15	1.2.3.18.353.353.10019	Turkey	Asia	Western Asia
SRR8499126	2018-06-04	1.2.3.18.353.353.10051	Turkey	Asia	Western Asia
[truncated: 314 more rows]

## Sheet: Table S1D
Accession	Collection Country	Model Classification	Collection Date	Collection Body	Reference
ERR2278734	Poland	Hungary	2016	National Veterinary Research Institute	NA
ERR2278723	Poland	Poland	2016	National Veterinary Research Institute	NA
ERR2278728	Poland	Poland	2016	National Veterinary Research Institute	NA
ERR2278729	Poland	Poland	2016	National Veterinary Research Institute	NA
ERR2278739	Poland	Poland	2016	National Veterinary Research Institute	NA
ERR2278742	Poland	Poland	2016	National Veterinary Research Institute	NA
ERR2278743	Poland	Poland	2016	National Veterinary Research Institute	NA
ERR2278749	Poland	Poland	2016	National Veterinary Research Institute	NA
ERR2278713	Poland	Poland	2016	National Veterinary Research Institute	NA
ERR2278718	Poland	Poland	2016	National Veterinary Research Institute	NA
ERR2278724	Poland	Poland	2016	National Veterinary Research Institute	NA
ERR2278738	Poland	Poland	2016	National Veterinary Research Institute	NA
ERR2278745	Poland	Poland	2016	National Veterinary Research Institute	NA
ERR2278715	Poland	Poland	2016	National Veterinary Research Institute	NA
ERR2278722	Poland	Poland	2016	National Veterinary Research Institute	NA
ERR2278725	Poland	Poland	2016	National Veterinary Research Institute	NA
ERR2278740	Poland	Poland	2016	National Veterinary Research Institute	NA
ERR2278744	Poland	Poland	2016	National Veterinary Research Institute	NA
ERR2278748	Poland	Poland	2016	National Veterinary Research Institute	NA
ERR2278721	Poland	Spain	2016	National Veterinary Research Institute	NA
ERR2278733	Poland	Spain	2016	National Veterinary Research Institute	NA
ERR2278717	Poland	Spain	2016	National Veterinary Research Institute	NA
ERR2278720	Poland	Spain	2016	National Veterinary Research Institute	NA
ERR2278726	Poland	Spain	2015	National Veterinary Research Institute	NA
ERR2278727	Poland	Spain	2016	National Veterinary Research Institute	NA
ERR2278735	Poland	Spain	2016	National Veterinary Research Institute	NA
ERR2278716	Poland	Spain	2016	National Veterinary Research Institute	NA
ERR2278736	Poland	Spain	2016	National Veterinary Research Institute	NA
ERR2278731	Poland	Spain	2016	National Veterinary Research Institute	NA
ERR2278741	Poland	Spain	2016	National Veterinary Research Institute	NA
ERR2278714	Poland	Spain	2016	National Veterinary Research Institute	NA
ERR2278719	Poland	Spain	2016	National Veterinary Research Institute	NA
ERR2278737	Poland	Spain	2016	National Veterinary Research Institute	NA
ERR2278746	Poland	Spain	2017	National Veterinary Research Institute	NA
ERR2278747	Poland	Turkey	2017	National Veterinary Research Institute	NA
SRR7777155	Singapore	Indonesia	2015	Ministry Of Health	Octavia et al., 2018
SRR7777164	Singapore	Indonesia	2014	Ministry Of Health	Octavia et al., 2018
SRR7777165	Singapore	Malaysia	2016	Ministry Of Health	Octavia et al., 2018
SRR7777161	Singapore	Singapore	2014	Ministry Of Health	Octavia et al., 2018
SRR7777162	Singapore	Singapore	2014	Ministry Of Health	Octavia et al., 2018
SRR7777163	Singapore	Singapore	2014	Ministry Of Health	Octavia et al., 2018
SRR7777172	Singapore	Singapore	2016	Ministry Of Health	Octavia et al., 2018
SRR7777167	Singapore	Singapore	2016	Ministry Of Health	Octavia et al., 2018
SRR7777170	Singapore	Singapore	2016	Ministry Of Health	Octavia et al., 2018
SRR7777178	Singapore	Singapore	2014	Ministry Of Health	Octavia et al., 2018
SRR7777184	Singapore	Singapore	2016	Ministry Of Health	Octavia et al., 2018
SRR7777200	Singapore	Singapore	2017	Ministry Of Health	Octavia et al., 2018
SRR7777175	Singapore	Singapore	2015	Ministry Of Health	Octavia et al., 2018
SRR7777183	Singapore	Singapore	2016	Ministry Of Health	Octavia et al., 2018
SRR7777202	Singapore	Singapore	2017	Ministry Of Health	Octavia et al., 2018
SRR7777212	Singapore	Singapore	2016	Ministry Of Health	Octavia et al., 2018
SRR7777215	Singapore	Singapore	2016	Ministry Of Health	Octavia et al., 2018
SRR7777218	Singapore	Singapore	2016	Ministry Of Health	Octavia et al., 2018
SRR7777223	Singapore	Singapore	2016	Ministry Of Health	Octavia et al., 2018
SRR7777206	Singapore	Singapore	2016	Ministry Of Health	Octavia et al., 2018
SRR7777207	Singapore	Singapore	2016	Ministry Of Health	Octavia et al., 2018
SRR7777222	Singapore	Singapore	2016	Ministry Of Health	Octavia et al., 2018
SRR7777150	Singapore	Singapore	2014	Ministry Of Health	Octavia et al., 2018
SRR7777166	Singapore	Singapore	2016	Ministry Of Health	Octavia et al., 2018
SRR7777171	Singapore	Singapore	2016	Ministry Of Health	Octavia et al., 2018
SRR7777185	Singapore	Singapore	2016	Ministry Of Health	Octavia et al., 2018
SRR7777193	Singapore	Singapore	2014	Ministry Of Health	Octavia et al., 2018
SRR7777194	Singapore	Singapore	2014	Ministry Of Health	Octavia et al., 2018
SRR7777208	Singapore	Singapore	2016	Ministry Of Health	Octavia et al., 2018
SRR7777209	Singapore	Singapore	2016	Ministry Of Health	Octavia et al., 2018
SRR7777211	Singapore	Singapore	2015	Ministry Of Health	Octavia et al., 2018
SRR7777214	Singapore	Singapore	2017	Ministry Of Health	Octavia et al., 2018
SRR7777217	Singapore	Singapore	2016	Ministry Of Health	Octavia et al., 2018
SRR7777219	Singapore	Singapore	2016	Ministry Of Health	Octavia et al., 2018
SRR7777220	Singapore	Singapore	2016	Ministry Of Health	Octavia et al., 2018
SRR7777224	Singapore	Singapore	2016	Ministry Of Health	Octavia et al., 2018
SRR7777169	Singapore	Singapore	2016	Ministry Of Health	Octavia et al., 2018
SRR7777173	Singapore	Singapore	2016	Ministry Of Health	Octavia et al., 2018
SRR7777176	Singapore	Singapore	2016	Ministry Of Health	Octavia et al., 2018
SRR7777180	Singapore	Singapore	2016	Ministry Of Health	Octavia et al., 2018
SRR7777182	Singapore	Singapore	2016	Ministry Of Health	Octavia et al., 2018
SRR7777190	Singapore	Singapore	2016	Ministry Of Health	Octavia et al., 2018
SRR7777204	Singapore	Singapore	2017	Ministry Of Health	Octavia et al., 2018
SRR7777205	Singapore	Singapore	2015	Ministry Of Health	Octavia et al., 2018
SRR7777213	Singapore	Singapore	2016	Ministry Of Health	Octavia et al., 2018
SRR7777216	Singapore	Singapore	2016	Ministry Of Health	Octavia et al., 2018
SRR7777221	Singapore	Singapore	2016	Ministry Of Health	Octavia et al., 2018
SRR7777160	Singapore	Thailand	2014	Ministry Of Health	Octavia et al., 2018
SRR12223838	South Africa	South africa	2018	National Institute for Communicable Diseases	Smith et al., 2020
SRR12223839	South Africa	South africa	2018	National Institute for Communicable Diseases	Smith et al., 2020
SRR12223842	South Africa	South africa	2018	National Institute for Communicable Diseases	Smith et al., 2020
SRR12223843	South Africa	South africa	2018	National Institute for Communicable Diseases	Smith et al., 2020
SRR12223846	South Africa	South africa	2018	National Institute for Communicable Diseases	Smith et al., 2020
SRR12223852	South Africa	South africa	2018	National Institute for Communicable Diseases	Smith et al., 2020
SRR12223853	South Africa	South africa	2018	National Institute for Communicable Diseases	Smith et al., 2020
SRR12223831	South Africa	South africa	2018	National Institute for Communicable Diseases	Smith et al., 2020
SRR12223834	South Africa	South africa	2018	National Institute for Communicable Diseases	Smith et al., 2020
SRR12223836	South Africa	South africa	2018	National Institute for Communicable Diseases	Smith et al., 2020
SRR12223837	South Africa	South africa	2018	National Institute for Communicable Diseases	Smith et al., 2020
SRR12223840	South Africa	South africa	2018	National Institute for Communicable Diseases	Smith et al., 2020
SRR12223832	South Africa	South africa	2018	National Institute for Communicable Diseases	Smith et al., 2020
SRR12223841	South Africa	South africa	2018	National Institute for Communicable Diseases	Smith et al., 2020
SRR12223849	South Africa	South africa	2018	National Institute for Communicable Diseases	Smith et al., 2020
SRR12223851	South Africa	South africa	2018	National Institute for Communicable Diseases	Smith et al., 2020
SRR12223854	South Africa	South africa	2018	National Institute for Communicable Diseases	Smith et al., 2020
SRR12223844	South Africa	South africa	2018	National Institute for Communicable Diseases	Smith et al., 2020
SRR12223845	South Africa	South africa	2018	National Institute for Communicable Diseases	Smith et al., 2020
SRR12223847	South Africa	South africa	2018	National Institute for Communicable Diseases	Smith et al., 2020
SRR12223850	South Africa	South africa	2018	National Institute for Communicable Diseases	Smith et al., 2020
SRR12223855	South Africa	South africa	2018	National Institute for Communicable Diseases	Smith et al., 2020
SRR12223833	South Africa	South africa	2018	National Institute for Communicable Diseases	Smith et al., 2020
SRR12223835	South Africa	South africa	2018	National Institute for Communicable Diseases	Smith et al., 2020
SRR12223848	South Africa	South africa	2018	National Institute for Communicable Diseases	Smith et al., 2020
SRR7523733	Poland	Spain	2018-05-25	UKHSA/PHE	Pijnacker et al., 2019
SRR7350599	Poland	Spain	2018-05-30	UKHSA/PHE	Pijnacker et al., 2019
SRR8492323	Poland	Spain	2018-06-21	UKHSA/PHE	Pijnacker et al., 2019
SRR8204740	Poland	Spain	2018-10-10	UKHSA/PHE	Pijnacker et al., 2019
SRR7841505	Poland	Spain	2018-07-31	UKHSA/PHE	Pijnacker et al., 2019
SRR8367067	Poland	Spain	2018-08-03	UKHSA/PHE	Pijnacker et al., 2019
SRR7850650	Poland	Spain	2018-08-30	UKHSA/PHE	Pijnacker et al., 2019
SRR7850533	Poland	Spain	2018-09-04	UKHSA/PHE	Pijnacker et al., 2019
SRR7892168	Poland	Spain	2018-09-07	UKHSA/PHE	Pijnacker et al., 2019
SRR7890472	Poland	Spain	2018-09-10	UKHSA/PHE	Pijnacker et al., 2019
SRR7885266	Poland	Spain	2018-09-10	UKHSA/PHE	Pijnacker et al., 2019
SRR8137417	Poland	Spain	2018-09-12	UKHSA/PHE	Pijnacker et al., 2019
SRR8131528	Poland	Spain	2018-09-14	UKHSA/PHE	Pijnacker et al., 2019
SRR8114905	Poland	Spain	2018-09-25	UKHSA/PHE	Pijnacker et al., 2019
SRR7910360	Poland	Spain	2018-09-10	UKHSA/PHE	Pijnacker et al., 2019
SRR8131506	Poland	Spain	2018-09-13	UKHSA/PHE	Pijnacker et al., 2019
SRR7962058	Poland	Spain	2018-09-18	UKHSA/PHE	Pijnacker et al., 2019
SRR7998203	Poland	Spain	2018-09-24	UKHSA/PHE	Pijnacker et al., 2019
SRR8097951	Poland	Spain	2018-09-27	UKHSA/PHE	Pijnacker et al., 2019
SRR8097943	Poland	Spain	2018-09-27	UKHSA/PHE	Pijnacker et al., 2019
SRR8097924	Poland	Spain	2018-09-27	UKHSA/PHE	Pijnacker et al., 2019
SRR8149423	Poland	Spain	2018-09-28	UKHSA/PHE	Pijnacker et al., 2019
SRR8149431	Poland	Spain	2018-10-24	UKHSA/PHE	Pijnacker et al., 2019
SRR4063746	Poland	Spain	2015-07-22	UKHSA/PHE	Pijnacker et al., 2019
SRR4063750	Poland	Portugal	2015-12-03	UKHSA/PHE	Pijnacker et al., 2019
SRR4063723	Poland	Portugal	2015-12-11	UKHSA/PHE	Pijnacker et al., 2019
SRR4063755	Poland	Spain	2015-12-18	UKHSA/PHE	Pijnacker et al., 2019
SRR5215891	Poland	Portugal	2015-07-24	UKHSA/PHE	Pijnacker et al., 2019
SRR5220233	Poland	Portugal	2015-08-03	UKHSA/PHE	Pijnacker et al., 2019
SRR7538879	Poland	Spain	2015-07-28	UKHSA/PHE	Pijnacker et al., 2019
SRR4063738	Poland	Portugal	2015-08-04	UKHSA/PHE	Pijnacker et al., 2019
SRR4063747	Poland	Spain	2015-08-07	UKHSA/PHE	Pijnacker et al., 2019
SRR4063715	Poland	Spain	2015-08-19	UKHSA/PHE	Pijnacker et al., 2019
SRR3284815	Poland	Spain	2015-11-27	UKHSA/PHE	Pijnacker et al., 2019
SRR6901054	Poland	Spain	2015-12-30	UKHSA/PHE	Pijnacker et al., 2019
SRR4063752	Poland	Spain	2016-01-12	UKHSA/PHE	Pijnacker et al., 2019
SRR4063699	Poland	Spain	2016-01-22	UKHSA/PHE	Pijnacker et al., 2019
SRR4063700	Poland	Spain	2016-02-09	UKHSA/PHE	Pijnacker et al., 2019
SRR6900097	Poland	Spain	2017-09-15	UKHSA/PHE	Pijnacker et al., 2019
SRR6899258	Poland	Spain	2017-09-19	UKHSA/PHE	Pijnacker et al., 2019
SRR6921964	Poland	Spain	2017-09-27	UKHSA/PHE	Pijnacker et al., 2019
SRR7523138	Poland	Spain	2018-06-26	UKHSA/PHE	Pijnacker et al., 2019
SRR7997085	Poland	Spain	2018-09-21	UKHSA/PHE	Pijnacker et al., 2019
SRR5193132	Poland	Spain	2016-12-05	UKHSA/PHE	Pijnacker et al., 2019
SRR6922690	Poland	Spain	2016-12-21	UKHSA/PHE	Pijnacker et al., 2019
SRR5584922	Poland	Portugal	2017-04-10	UKHSA/PHE	Pijnacker et al., 2019
SRR6900878	Poland	Spain	2017-07-19	UKHSA/PHE	Pijnacker et al., 2019
SRR6920541	Poland	Portugal	2017-05-31	UKHSA/PHE	Pijnacker et al., 2019
SRR6922652	Poland	Spain	2017-05-15	UKHSA/PHE	Pijnacker et al., 2019
SRR6918861	Poland	Spain	2017-05-22	UKHSA/PHE	Pijnacker et al., 2019
SRR6900984	Poland	Portugal	2017-05-24	UKHSA/PHE	Pijnacker et al., 2019
SRR6898839	Poland	Spain	2017-05-19	UKHSA/PHE	Pijnacker et al., 2019
SRR6898941	Poland	Spain	2017-05-30	UKHSA/PHE	Pijnacker et al., 2019
SRR6922699	Poland	Portugal	2017-06-02	UKHSA/PHE	Pijnacker et al., 2019
SRR6898404	Poland	Spain	2017-07-12	UKHSA/PHE	Pijnacker et al., 2019
SRR6920168	Poland	Portugal	2017-08-02	UKHSA/PHE	Pijnacker et al., 2019
SRR6922068	Poland	Portugal	2017-07-18	UKHSA/PHE	Pijnacker et al., 2019
SRR6919917	Poland	Portugal	2017-07-18	UKHSA/PHE	Pijnacker et al., 2019
SRR6922020	Poland	Spain	2017-07-19	UKHSA/PHE	Pijnacker et al., 2019
SRR6897980	Poland	Spain	2017-07-20	UKHSA/PHE	Pijnacker et al., 2019
SRR6922660	Poland	Spain	2017-07-24	UKHSA/PHE	Pijnacker et al., 2019
SRR6918604	Poland	Spain	2017-07-28	UKHSA/PHE	Pijnacker et al., 2019
SRR6898007	Poland	Spain	2017-07-28	UKHSA/PHE	Pijnacker et al., 2019
SRR6897870	Poland	Portugal	2017-08-04	UKHSA/PHE	Pijnacker et al., 2019
SRR6898121	Poland	Spain	2017-08-08	UKHSA/PHE	Pijnacker et al., 2019
SRR6918299	Poland	Spain	2017-08-02	UKHSA/PHE	Pijnacker et al., 2019
SRR6898018	Poland	Spain	2017-09-01	UKHSA/PHE	Pijnacker et al., 2019
SRR6919991	Poland	Portugal	2017-09-04	UKHSA/PHE	Pijnacker et al., 2019
SRR6899374	Poland	Spain	2017-09-04	UKHSA/PHE	Pijnacker et al., 2019
SRR6919914	Poland	Spain	2017-09-06	UKHSA/PHE	Pijnacker et al., 2019
SRR6901178	Poland	Spain	2017-09-06	UKHSA/PHE	Pijnacker et al., 2019
SRR6897886	Poland	Spain	2017-09-06	UKHSA/PHE	Pijnacker et al., 2019
SRR6901062	Poland	Spain	2017-09-07	UKHSA/PHE	Pijnacker et al., 2019
SRR6898821	Poland	Spain	2017-09-11	UKHSA/PHE	Pijnacker et al., 2019
SRR6919951	Poland	Spain	2017-09-12	UKHSA/PHE	Pijnacker et al., 2019
SRR6924113	Poland	Spain	2017-09-13	UKHSA/PHE	Pijnacker et al., 2019
SRR6919112	Poland	Spain	2017-09-13	UKHSA/PHE	Pijnacker et al., 2019
SRR6918852	Poland	Spain	2017-09-13	UKHSA/PHE	Pijnacker et al., 2019
SRR6898438	Poland	Spain	2017-09-13	UKHSA/PHE	Pijnacker et al., 2019
SRR6898849	Poland	Spain	2017-09-15	UKHSA/PHE	Pijnacker et al., 2019
SRR6897054	Poland	Spain	2017-09-15	UKHSA/PHE	Pijnacker et al., 2019
SRR6924084	Poland	Spain	2017-09-20	UKHSA/PHE	Pijnacker et al., 2019
SRR6922669	Poland	Spain	2017-09-27	UKHSA/PHE	Pijnacker et al., 2019
SRR6900193	Poland	Greece	2017-09-08	UKHSA/PHE	Pijnacker et al., 2019
SRR6922607	Poland	Spain	2017-09-12	UKHSA/PHE	Pijnacker et al., 2019
SRR6900871	Poland	Spain	2017-09-15	UKHSA/PHE	Pijnacker et al., 2019
SRR6918644	Poland	Spain	2017-09-20	UKHSA/PHE	Pijnacker et al., 2019
SRR6919808	Poland	Spain	2017-09-15	UKHSA/PHE	Pijnacker et al., 2019
SRR6897051	Poland	Spain	2017-09-15	UKHSA/PHE	Pijnacker et al., 2019
SRR6919100	Poland	Spain	2017-09-15	UKHSA/PHE	Pijnacker et al., 2019
SRR6919796	Poland	Spain	2017-09-12	UKHSA/PHE	Pijnacker et al., 2019
SRR6920097	Poland	Spain	2017-09-12	UKHSA/PHE	Pijnacker et al., 2019
SRR6900909	Poland	Spain	2017-09-19	UKHSA/PHE	Pijnacker et al., 2019
SRR6924076	Poland	Spain	2017-09-20	UKHSA/PHE	Pijnacker et al., 2019
SRR6899438	Poland	Spain	2017-10-09	UKHSA/PHE	Pijnacker et al., 2019
SRR6924133	Poland	Portugal	2017-10-17	UKHSA/PHE	Pijnacker et al., 2019
SRR6900887	Poland	Spain	2017-10-06	UKHSA/PHE	Pijnacker et al., 2019
SRR6919293	Poland	Spain	2017-10-12	UKHSA/PHE	Pijnacker et al., 2019
SRR6918294	Poland	Spain	2017-12-04	UKHSA/PHE	Pijnacker et al., 2019
SRR6898422	Poland	Spain	2017-08-30	UKHSA/PHE	Pijnacker et al., 2019
SRR6898083	Poland	Spain	2017-09-06	UKHSA/PHE	Pijnacker et al., 2019
SRR7351458	Poland	Portugal	2018-04-24	UKHSA/PHE	Pijnacker et al., 2019
SRR8499000	Poland	Spain	2018-05-08	UKHSA/PHE	Pijnacker et al., 2019
SRR8515670	Poland	Portugal	2018-05-09	UKHSA/PHE	Pijnacker et al., 2019
SRR7516466	Poland	Portugal	2018-05-09	UKHSA/PHE	Pijnacker et al., 2019
SRR7416093	Poland	Portugal	2018-05-09	UKHSA/PHE	Pijnacker et al., 2019
SRR7278047	Poland	Portugal	2018-05-09	UKHSA/PHE	Pijnacker et al., 2019
SRR8509115	Poland	Spain	2018-05-10	UKHSA/PHE	Pijnacker et al., 2019
SRR8503803	Poland	Spain	2018-05-10	UKHSA/PHE	Pijnacker et al., 2019
SRR8499035	Poland	Spain	2018-05-10	UKHSA/PHE	Pijnacker et al., 2019
SRR7873952	Poland	Spain	2018-05-10	UKHSA/PHE	Pijnacker et al., 2019
SRR7456768	Poland	Spain	2018-05-10	UKHSA/PHE	Pijnacker et al., 2019
SRR7439595	Poland	Portugal	2018-05-10	UKHSA/PHE	Pijnacker et al., 2019
SRR7249838	Poland	Spain	2018-05-10	UKHSA/PHE	Pijnacker et al., 2019
SRR7359066	Poland	Spain	2018-05-15	UKHSA/PHE	Pijnacker et al., 2019
SRR7350588	Poland	Portugal	2018-05-15	UKHSA/PHE	Pijnacker et al., 2019
SRR8499138	Poland	Spain	2018-05-16	UKHSA/PHE	Pijnacker et al., 2019
SRR7456711	Poland	Portugal	2018-05-16	UKHSA/PHE	Pijnacker et al., 2019
SRR7344650	Poland	Portugal	2018-05-16	UKHSA/PHE	Pijnacker et al., 2019
SRR7297922	Poland	Spain	2018-05-16	UKHSA/PHE	Pijnacker et al., 2019
SRR7275015	Poland	Portugal	2018-05-16	UKHSA/PHE	Pijnacker et al., 2019
SRR7237430	Poland	Spain	2018-05-16	UKHSA/PHE	Pijnacker et al., 2019
SRR7223242	Poland	Portugal	2018-05-16	UKHSA/PHE	Pijnacker et al., 2019
SRR8508664	Poland	Spain	2018-05-22	UKHSA/PHE	Pijnacker et al., 2019
SRR7469150	Poland	Spain	2018-05-22	UKHSA/PHE	Pijnacker et al., 2019
SRR7415099	Poland	Spain	2018-05-10	UKHSA/PHE	Pijnacker et al., 2019
SRR8498997	Poland	Spain	2018-05-08	UKHSA/PHE	Pijnacker et al., 2019
SRR8499137	Poland	Spain	2018-05-11	UKHSA/PHE	Pijnacker et al., 2019
SRR8499334	Poland	Spain	2018-05-15	UKHSA/PHE	Pijnacker et al., 2019
SRR7416295	Poland	Portugal	2018-05-17	UKHSA/PHE	Pijnacker et al., 2019
SRR7292910	Poland	Spain	2018-05-22	UKHSA/PHE	Pijnacker et al., 2019
SRR1957942	Spain	Spain	2014-10-04	UKHSA/PHE	Inns et al., 2016
SRR1958017	Spain	Spain	2014-09-15	UKHSA/PHE	Inns et al., 2016
SRR1958156	Spain	Spain	2014-07-03	UKHSA/PHE	Inns et al., 2016
SRR1960253	Spain	Spain	2014-12-30	UKHSA/PHE	Inns et al., 2016
SRR1966021	Spain	Spain	2015-03-03	UKHSA/PHE	Inns et al., 2016
SRR1966200	Spain	Spain	2015-01-22	UKHSA/PHE	Inns et al., 2016
SRR1966421	Spain	Spain	2015-03-09	UKHSA/PHE	Inns et al., 2016
SRR1966697	Spain	Spain	2015-03-19	UKHSA/PHE	Inns et al., 2016
SRR1967334	Spain	Spain	2014-04-15	UKHSA/PHE	Inns et al., 2016
SRR1967401	Spain	Spain	2014-03-31	UKHSA/PHE	Inns et al., 2016
SRR1967425	Spain	Spain	2014-06-17	UKHSA/PHE	Inns et al., 2016
SRR1967498	Spain	Spain	2015-03-15	UKHSA/PHE	Inns et al., 2016
SRR1967559	Spain	Spain	2015-03-18	UKHSA/PHE	Inns et al., 2016
SRR1967568	Spain	Spain	2014-09-30	UKHSA/PHE	Inns et al., 2016
SRR1968388	Spain	Spain	2015-03-19	UKHSA/PHE	Inns et al., 2016
SRR1968584	Spain	Spain	2014-07-03	UKHSA/PHE	Inns et al., 2016
SRR1969326	Spain	Spain	2015-02-27	UKHSA/PHE	Inns et al., 2016
SRR1969428	Spain	Spain	2015-03-19	UKHSA/PHE	Inns et al., 2016
SRR1969547	Spain	Spain	2014-07-26	UKHSA/PHE	Inns et al., 2016
SRR1969612	Spain	Spain	2015-03-24	UKHSA/PHE	Inns et al., 2016
SRR1969925	Spain	Spain	2014-04-09	UKHSA/PHE	Inns et al., 2016
SRR1970075	Spain	Spain	2015-03-03	UKHSA/PHE	Inns et al., 2016
SRR3048713	Spain	Spain	2014-03-31	UKHSA/PHE	Inns et al., 2016
SRR3049279	Spain	Spain	2014-03-27	UKHSA/PHE	Inns et al., 2016
SRR3049325	Spain	Spain	2015-03-10	UKHSA/PHE	Inns et al., 2016
SRR3049369	Spain	Spain	2015-03-19	UKHSA/PHE	Inns et al., 2016
SRR3049372	Spain	Spain	2014-04-03	UKHSA/PHE	Inns et al., 2016
SRR3049653	Spain	Spain	2014-03-26	UKHSA/PHE	Inns et al., 2016
SRR3120667	Spain	Spain	2014-07-22	UKHSA/PHE	Inns et al., 2016
SRR3284680	Spain	Spain	2015-04-14	UKHSA/PHE	Inns et al., 2016
SRR3284683	Spain	Spain	2015-08-04	UKHSA/PHE	Inns et al., 2016
SRR3284688	Spain	Spain	2015-08-04	UKHSA/PHE	Inns et al., 2016
SRR3284710	Spain	Spain	2015-09-07	UKHSA/PHE	Inns et al., 2016
SRR3284729	Spain	Spain	2015-04-30	UKHSA/PHE	Inns et al., 2016
SRR3284746	Spain	Spain	2015-04-29	UKHSA/PHE	Inns et al., 2016
SRR3284869	Spain	Spain	2015-08-31	UKHSA/PHE	Inns et al., 2016
SRR3285245	Spain	Spain	2015-04-17	UKHSA/PHE	Inns et al., 2016
SRR3285424	Spain	Spain	2015-04-09	UKHSA/PHE	Inns et al., 2016
SRR3285449	Spain	Spain	2015-08-04	UKHSA/PHE	Inns et al., 2016
SRR3285480	Spain	Spain	2015-10-01	UKHSA/PHE	Inns et al., 2016
SRR3285485	Spain	Spain	2015-04-30	UKHSA/PHE	Inns et al., 2016
SRR3286569	Spain	Spain	2015-03-26	UKHSA/PHE	Inns et al., 2016
SRR3286571	Spain	Spain	2015-04-12	UKHSA/PHE	Inns et al., 2016
SRR3286583	Spain	Spain	2015-04-08	UKHSA/PHE	Inns et al., 2016
SRR3286586	Spain	Spain	2015-03-30	UKHSA/PHE	Inns et al., 2016
SRR3286593	Spain	Spain	2015-04-21	UKHSA/PHE	Inns et al., 2016
SRR3286606	Spain	Spain	2015-04-02	UKHSA/PHE	Inns et al., 2016
SRR3286609	Spain	Spain	2015-04-15	UKHSA/PHE	Inns et al., 2016
SRR3286632	Spain	Spain	2015-04-20	UKHSA/PHE	Inns et al., 2016
SRR3286636	Spain	Spain	2015-04-22	UKHSA/PHE	Inns et al., 2016
SRR3286643	Spain	Spain	2015-04-10	UKHSA/PHE	Inns et al., 2016
SRR3286645	Spain	Spain	2015-04-09	UKHSA/PHE	Inns et al., 2016
SRR3286655	Spain	Spain	2015-04-11	UKHSA/PHE	Inns et al., 2016
SRR3286657	Spain	Spain	2015-04-04	UKHSA/PHE	Inns et al., 2016
SRR3286661	Spain	Spain	2015-04-01	UKHSA/PHE	Inns et al., 2016
SRR3286675	Spain	Spain	2015-03-31	UKHSA/PHE	Inns et al., 2016
SRR3286690	Spain	Spain	2015-04-13	UKHSA/PHE	Inns et al., 2016
SRR3286698	Spain	Spain	2015-05-14	UKHSA/PHE	Inns et al., 2016
SRR3286700	Spain	Spain	2015-05-07	UKHSA/PHE	Inns et al., 2016
SRR3286701	Spain	Spain	2015-05-15	UKHSA/PHE	Inns et al., 2016
SRR3286708	Spain	Spain	2015-05-14	UKHSA/PHE	Inns et al., 2016
SRR3286710	Spain	Spain	2015-05-20	UKHSA/PHE	Inns et al., 2016
SRR3286778	Spain	Spain	2015-05-11	UKHSA/PHE	Inns et al., 2016
SRR3286809	Spain	Spain	2015-05-11	UKHSA/PHE	Inns et al., 2016
SRR3286853	Spain	Spain	2015-05-26	UKHSA/PHE	Inns et al., 2016
SRR3286877	Spain	Spain	2015-06-02	UKHSA/PHE	Inns et al., 2016
SRR3286908	Spain	Spain	2015-06-15	UKHSA/PHE	Inns et al., 2016
SRR3286928	Spain	Spain	2015-06-27	UKHSA/PHE	Inns et al., 2016
SRR3312072	Spain	Spain	2015-06-28	UKHSA/PHE	Inns et al., 2016
SRR3312073	Spain	Spain	2015-05-22	UKHSA/PHE	Inns et al., 2016
SRR3312161	Spain	Spain	2015-08-17	UKHSA/PHE	Inns et al., 2016
SRR3312173	Spain	Spain	2015-04-20	UKHSA/PHE	Inns et al., 2016
SRR3312174	Spain	Spain	2015-09-02	UKHSA/PHE	Inns et al., 2016
SRR3312187	Spain	Spain	2015-08-18	UKHSA/PHE	Inns et al., 2016
SRR3312276	Spain	Spain	2015-06-26	UKHSA/PHE	Inns et al., 2016
SRR3312277	Spain	Spain	2015-08-21	UKHSA/PHE	Inns et al., 2016
SRR3312300	Spain	Spain	2015-07-31	UKHSA/PHE	Inns et al., 2016
SRR3312324	Spain	Spain	2015-09-07	UKHSA/PHE	Inns et al., 2016
SRR3312335	Spain	Spain	2015-09-01	UKHSA/PHE	Inns et al., 2016
SRR3312337	Spain	Spain	2015-09-05	UKHSA/PHE	Inns et al., 2016
SRR3312339	Spain	Spain	2015-08-20	UKHSA/PHE	Inns et al., 2016
SRR3312340	Spain	Spain	2015-07-17	UKHSA/PHE	Inns et al., 2016
SRR3312341	Spain	Spain	2015-08-25	UKHSA/PHE	Inns et al., 2016
SRR3312342	Spain	Spain	2015-07-23	UKHSA/PHE	Inns et al., 2016
SRR3312343	Spain	Spain	2015-06-22	UKHSA/PHE	Inns et al., 2016
SRR3312344	Spain	Spain	2015-09-02	UKHSA/PHE	Inns et al., 2016
SRR3312345	Spain	Spain	2015-08-18	UKHSA/PHE	Inns et al., 2016
SRR3312348	Spain	Spain	2015-04-24	UKHSA/PHE	Inns et al., 2016
SRR3312356	Spain	Spain	2015-08-24	UKHSA/PHE	Inns et al., 2016
SRR3312492	Spain	Spain	2015-08-07	UKHSA/PHE	Inns et al., 2016
SRR3312512	Spain	Spain	2015-09-20	UKHSA/PHE	Inns et al., 2016
SRR3312513	Spain	Spain	2015-04-22	UKHSA/PHE	Inns et al., 2016
SRR3312514	Spain	Spain	2015-05-13	UKHSA/PHE	Inns et al., 2016
SRR3312520	Spain	Spain	2015-08-28	UKHSA/PHE	Inns et al., 2016
SRR3312525	Spain	Spain	2015-08-28	UKHSA/PHE	Inns et al., 2016
SRR3312528	Spain	Spain	2015-06-05	UKHSA/PHE	Inns et al., 2016
SRR3312529	Spain	Spain	2015-09-11	UKHSA/PHE	Inns et al., 2016
SRR3312530	Spain	Spain	2015-08-04	UKHSA/PHE	Inns et al., 2016
SRR3312531	Spain	Spain	2015-09-01	UKHSA/PHE	Inns et al., 2016
SRR3312533	Spain	Spain	2015-09-04	UKHSA/PHE	Inns et al., 2016
SRR3312545	Spain	Spain	2015-08-27	UKHSA/PHE	Inns et al., 2016
SRR3312546	Spain	Spain	2015-08-05	UKHSA/PHE	Inns et al., 2016
SRR3312547	Spain	Spain	2015-08-27	UKHSA/PHE	Inns et al., 2016
SRR3312548	Spain	Spain	2015-09-10	UKHSA/PHE	Inns et al., 2016
SRR3312549	Spain	Spain	2015-05-03	UKHSA/PHE	Inns et al., 2016
SRR3312550	Spain	Spain	2015-09-02	UKHSA/PHE	Inns et al., 2016
SRR3312551	Spain	Spain	2015-04-16	UKHSA/PHE	Inns et al., 2016
SRR3312559	Spain	Spain	2015-04-15	UKHSA/PHE	Inns et al., 2016
SRR3312576	Spain	Spain	2015-05-21	UKHSA/PHE	Inns et al., 2016
SRR3312577	Spain	Spain	2015-09-24	UKHSA/PHE	Inns et al., 2016
SRR3312578	Spain	Spain	2015-04-29	UKHSA/PHE	Inns et al., 2016
SRR3312579	Spain	Spain	2015-09-08	UKHSA/PHE	Inns et al., 2016
SRR3312589	Spain	Spain	2015-09-04	UKHSA/PHE	Inns et al., 2016
SRR3312591	Spain	Spain	2015-09-01	UKHSA/PHE	Inns et al., 2016
SRR3312597	Spain	Spain	2015-08-21	UKHSA/PHE	Inns et al., 2016
SRR3312604	Spain	Spain	2015-09-01	UKHSA/PHE	Inns et al., 2016
SRR3319055	Spain	Spain	2015-08-26	UKHSA/PHE	Inns et al., 2016
SRR3319056	Spain	Spain	2015-08-24	UKHSA/PHE	Inns et al., 2016
SRR3319058	Spain	Spain	2015-09-09	UKHSA/PHE	Inns et al., 2016
SRR3319059	Spain	Spain	2015-08-30	UKHSA/PHE	Inns et al., 2016
SRR3319061	Spain	Spain	2015-08-26	UKHSA/PHE	Inns et al., 2016
SRR3319062	Spain	Spain	2015-08-27	UKHSA/PHE	Inns et al., 2016
SRR3319065	Spain	Spain	2015-09-30	UKHSA/PHE	Inns et al., 2016
SRR3319066	Spain	Spain	2015-04-29	UKHSA/PHE	Inns et al., 2016
SRR3319067	Spain	Spain	2015-07-23	UKHSA/PHE	Inns et al., 2016
SRR3319068	Spain	Spain	2015-08-14	UKHSA/PHE	Inns et al., 2016
SRR3319069	Spain	Spain	2015-05-10	UKHSA/PHE	Inns et al., 2016
SRR3319071	Spain	Spain	2015-08-24	UKHSA/PHE	Inns et al., 2016
