# Supplementary figures and images for: Rapid geographical source attribution of Salmonella enterica serovar Enteritidis genomes using hierarchical machine learning
Source: eLife journal article supplement (doi:10.7554/elife.84167), 2023-04-12

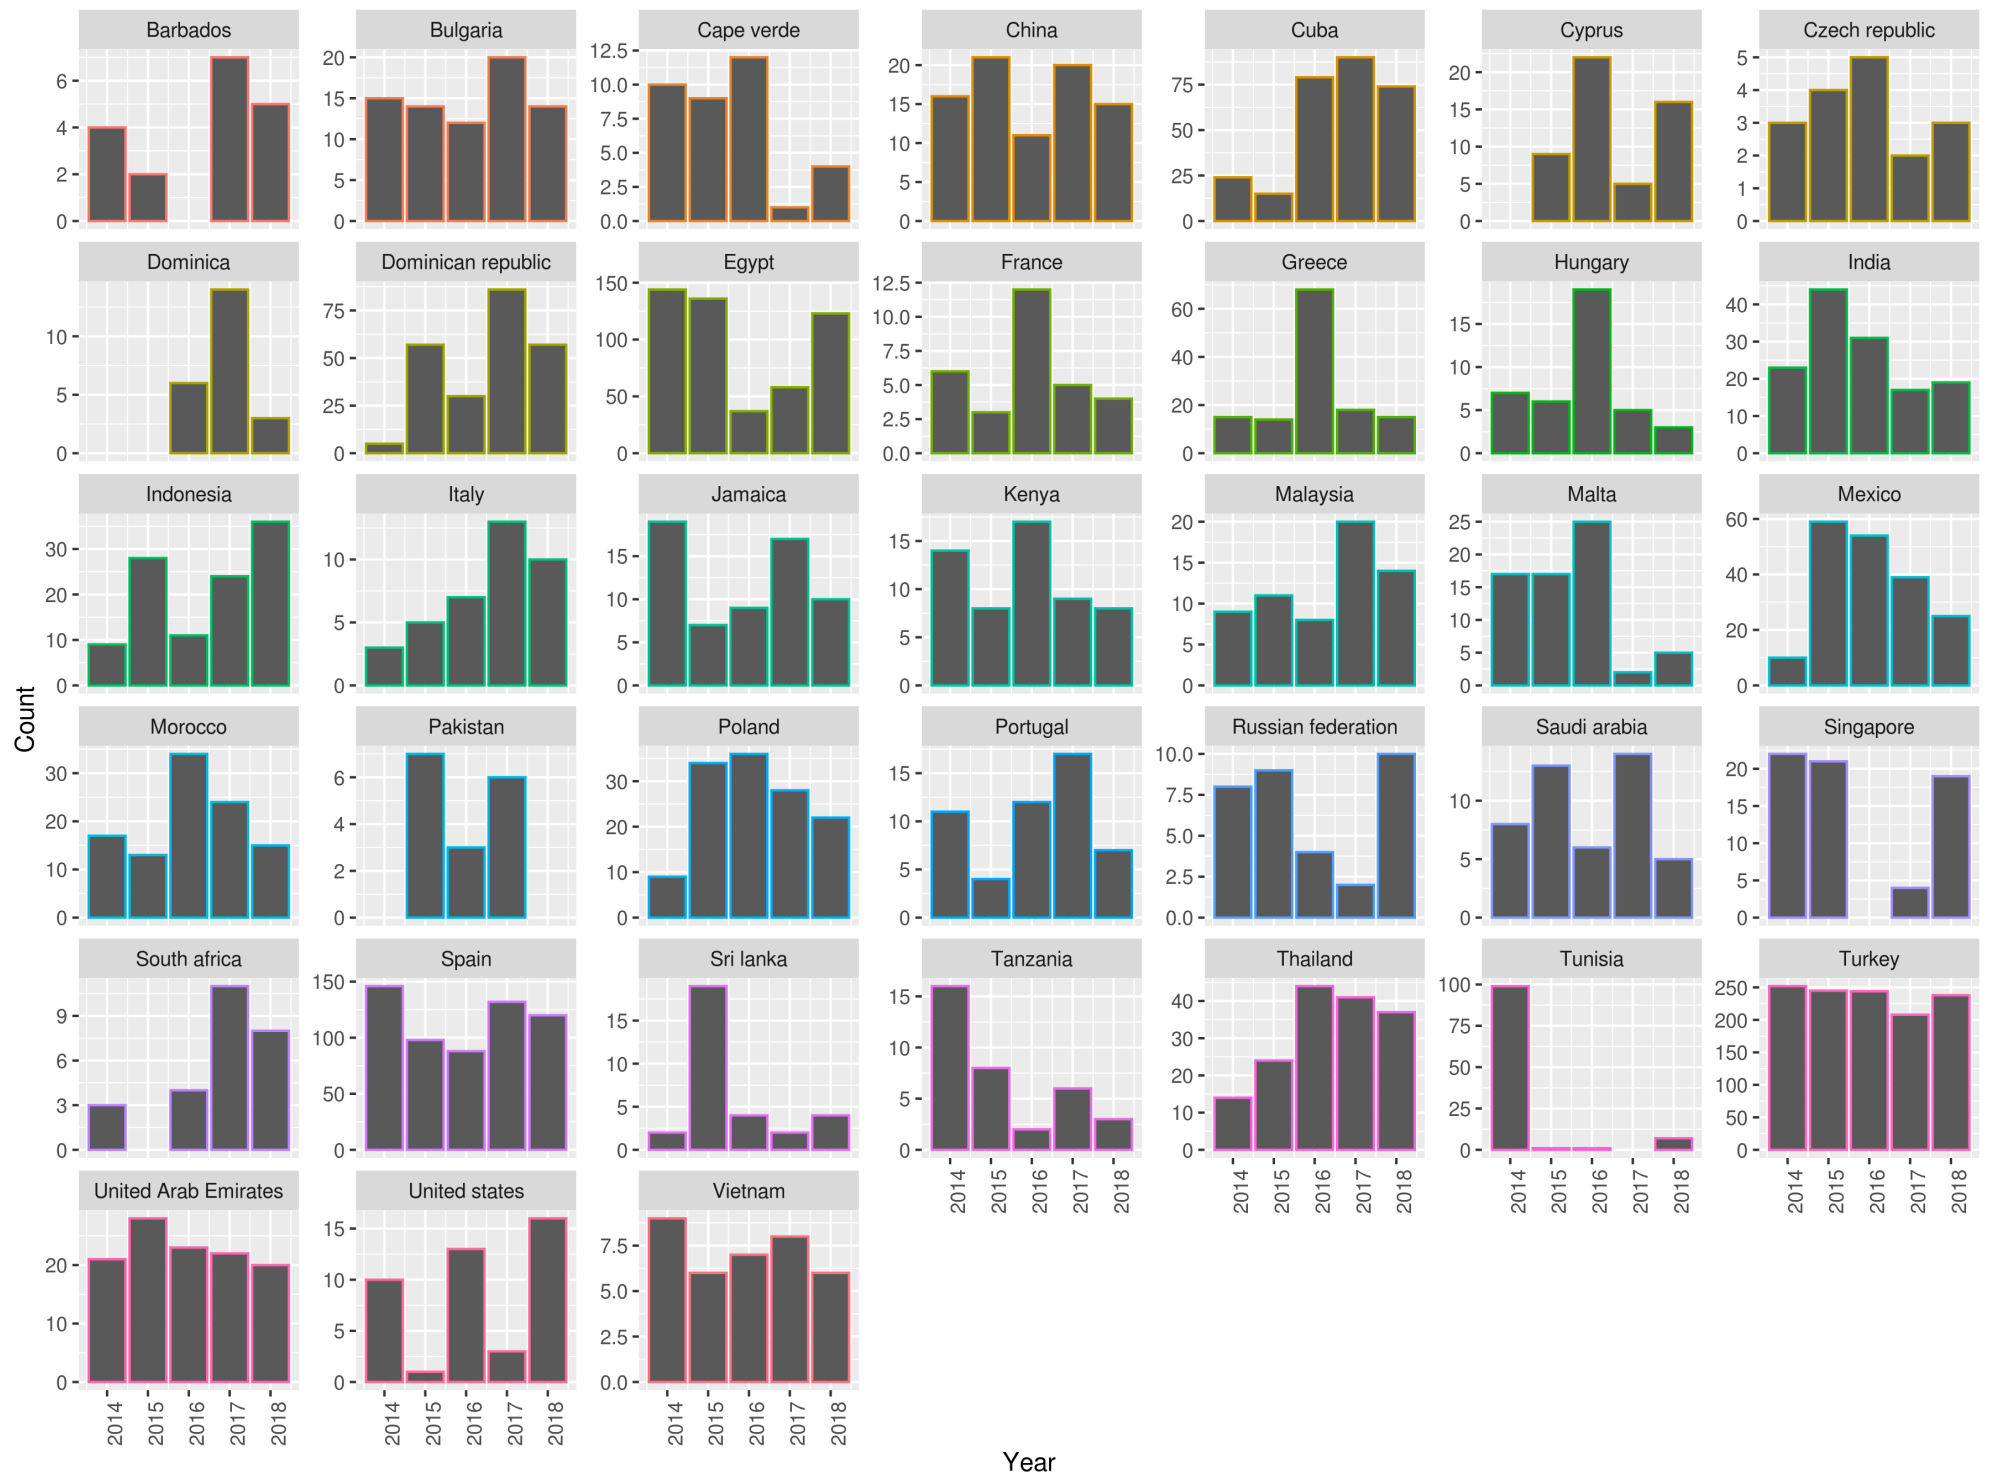

Supplement: supp [file elife_poa_e84167_Figure_1_figure_supplement_1.pdf › elife_poa_e84167_Figure_1_figure_supplement_1.pdf]

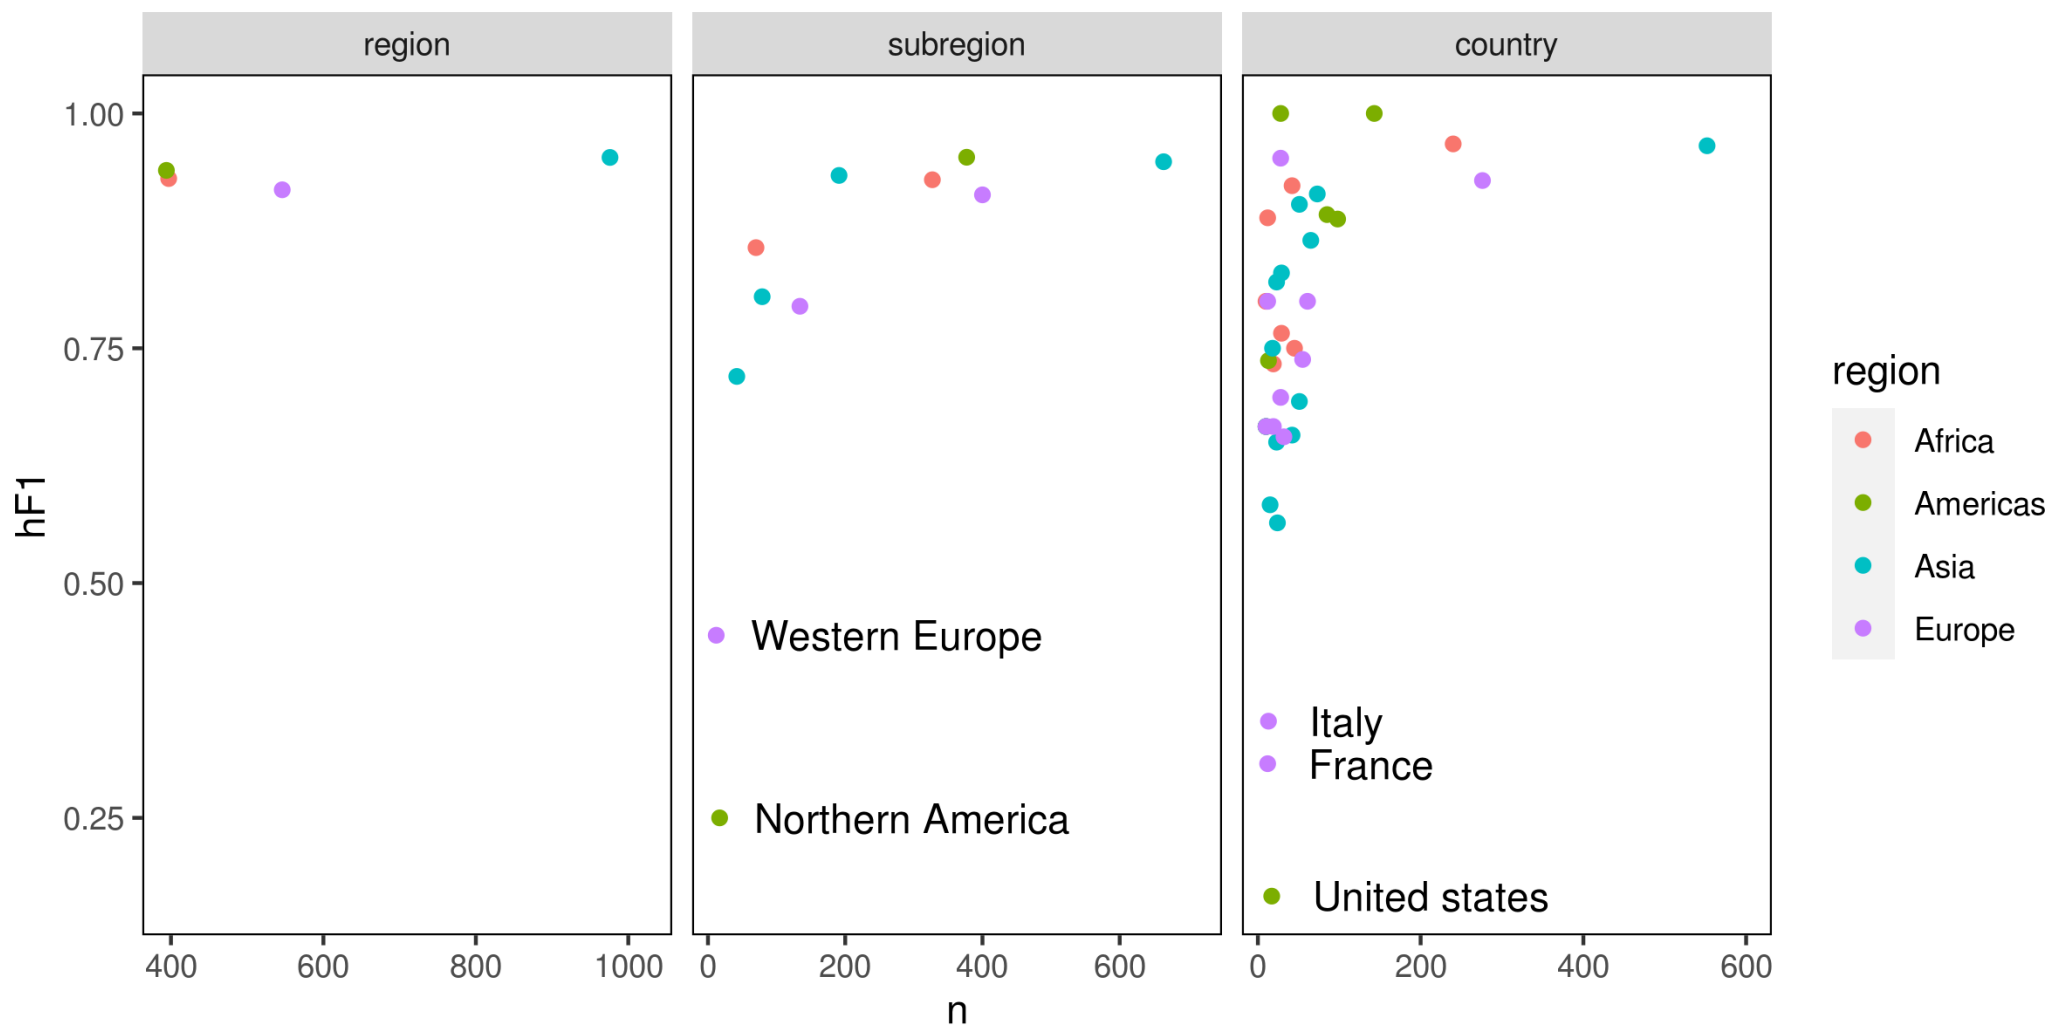

Supplement: supp [file elife_poa_e84167_Figure_3_figure_supplement_1.pdf › elife_poa_e84167_Figure_3_figure_supplement_1.pdf]

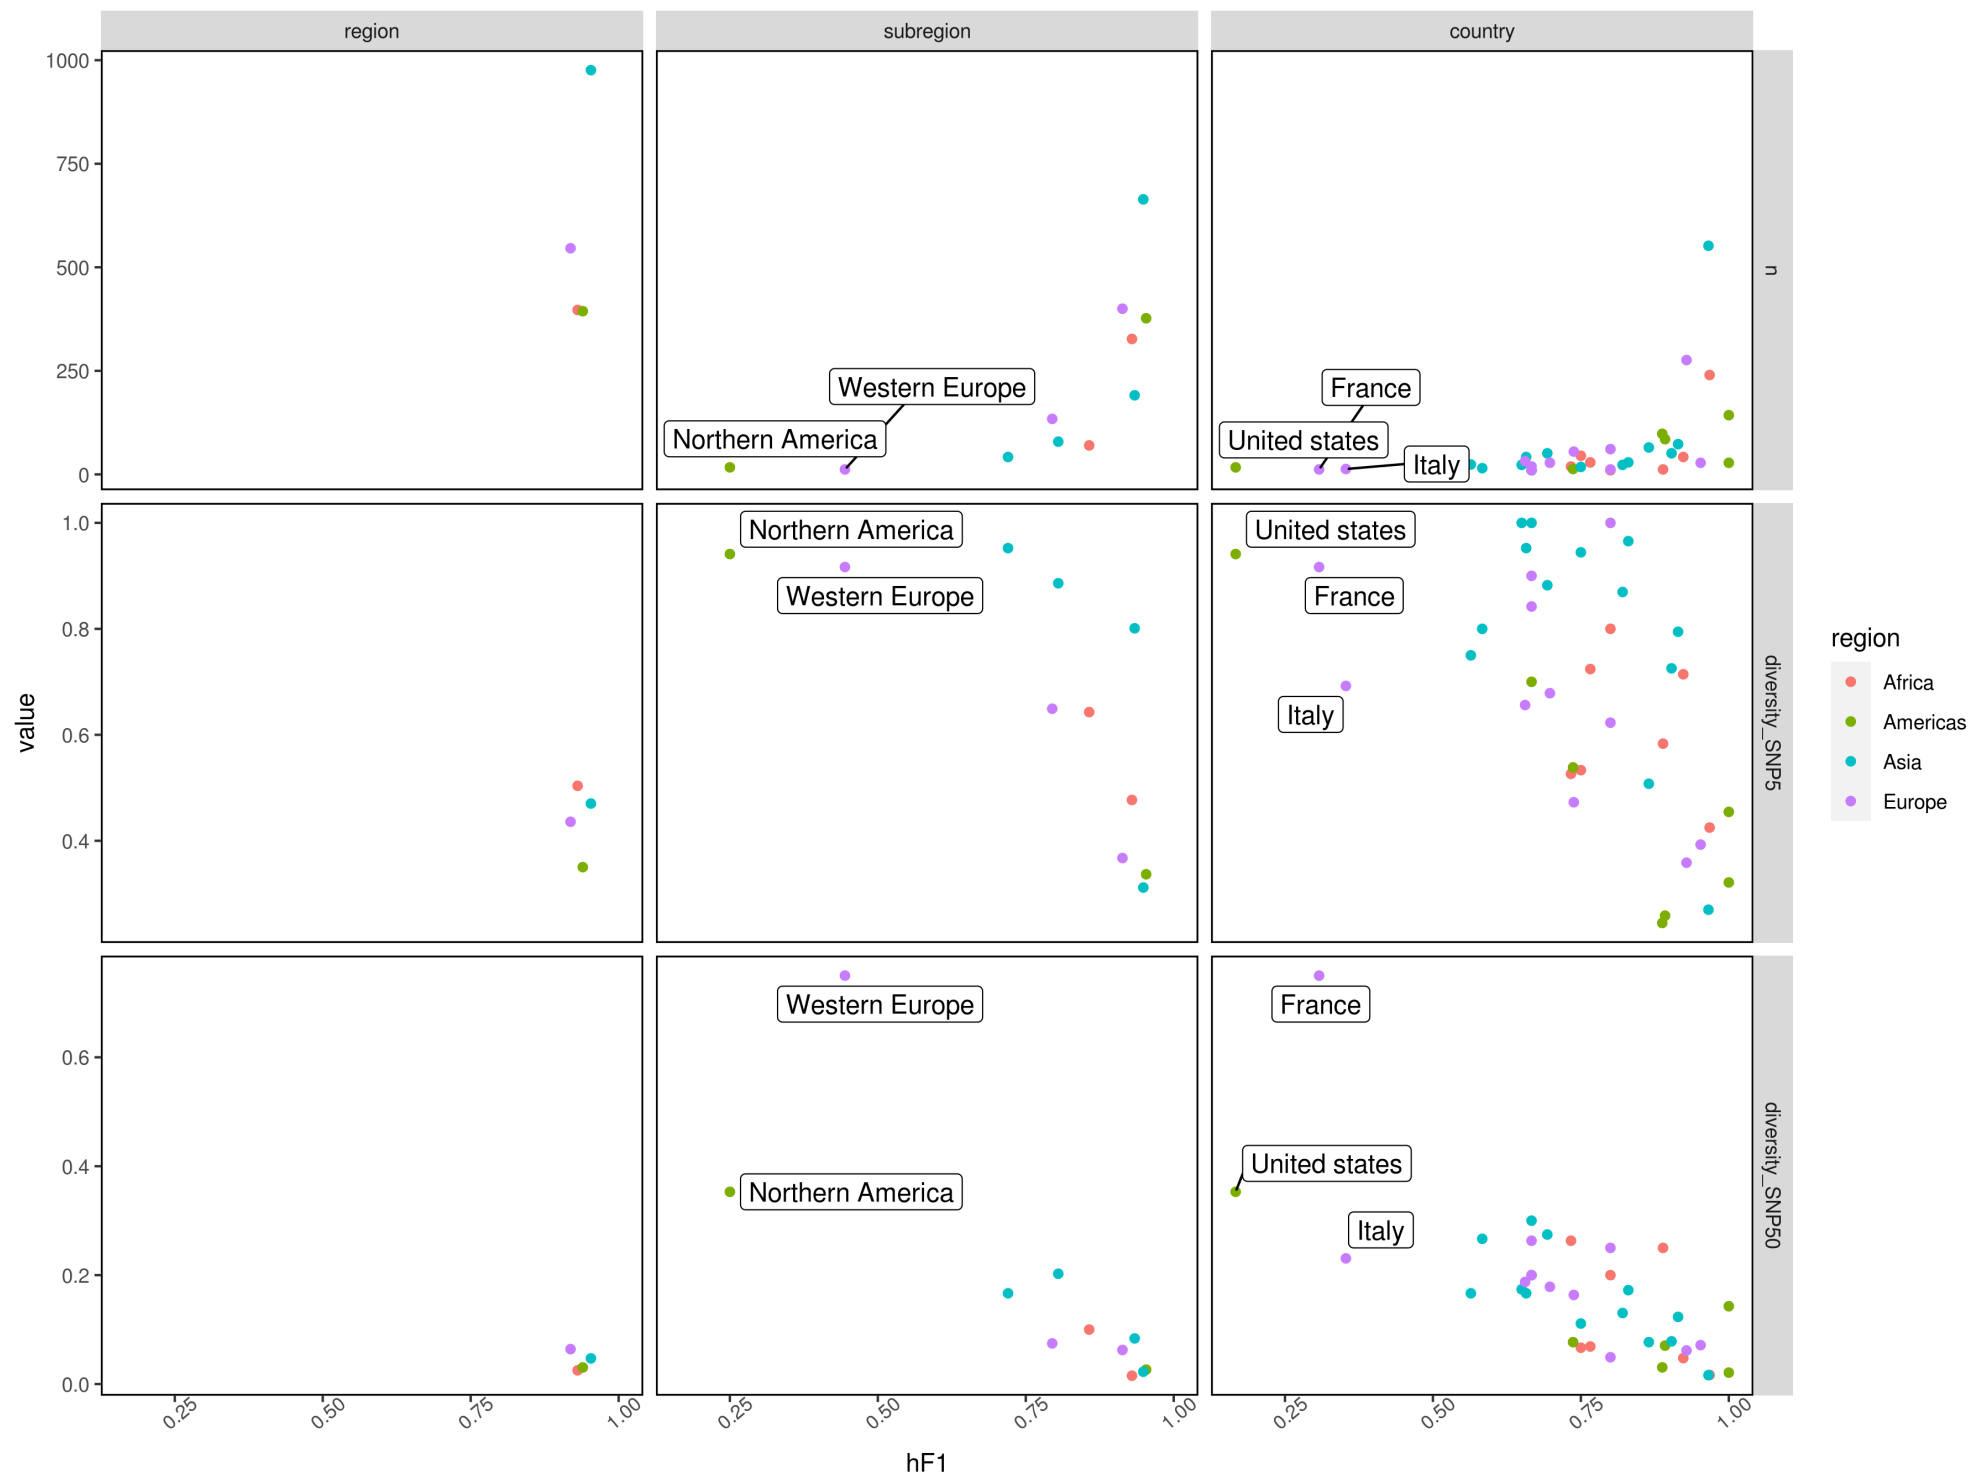

Supplement: supp [file elife_poa_e84167_Figure_3_figure_supplement_2.pdf › elife_poa_e84167_Figure_3_figure_supplement_2.pdf]

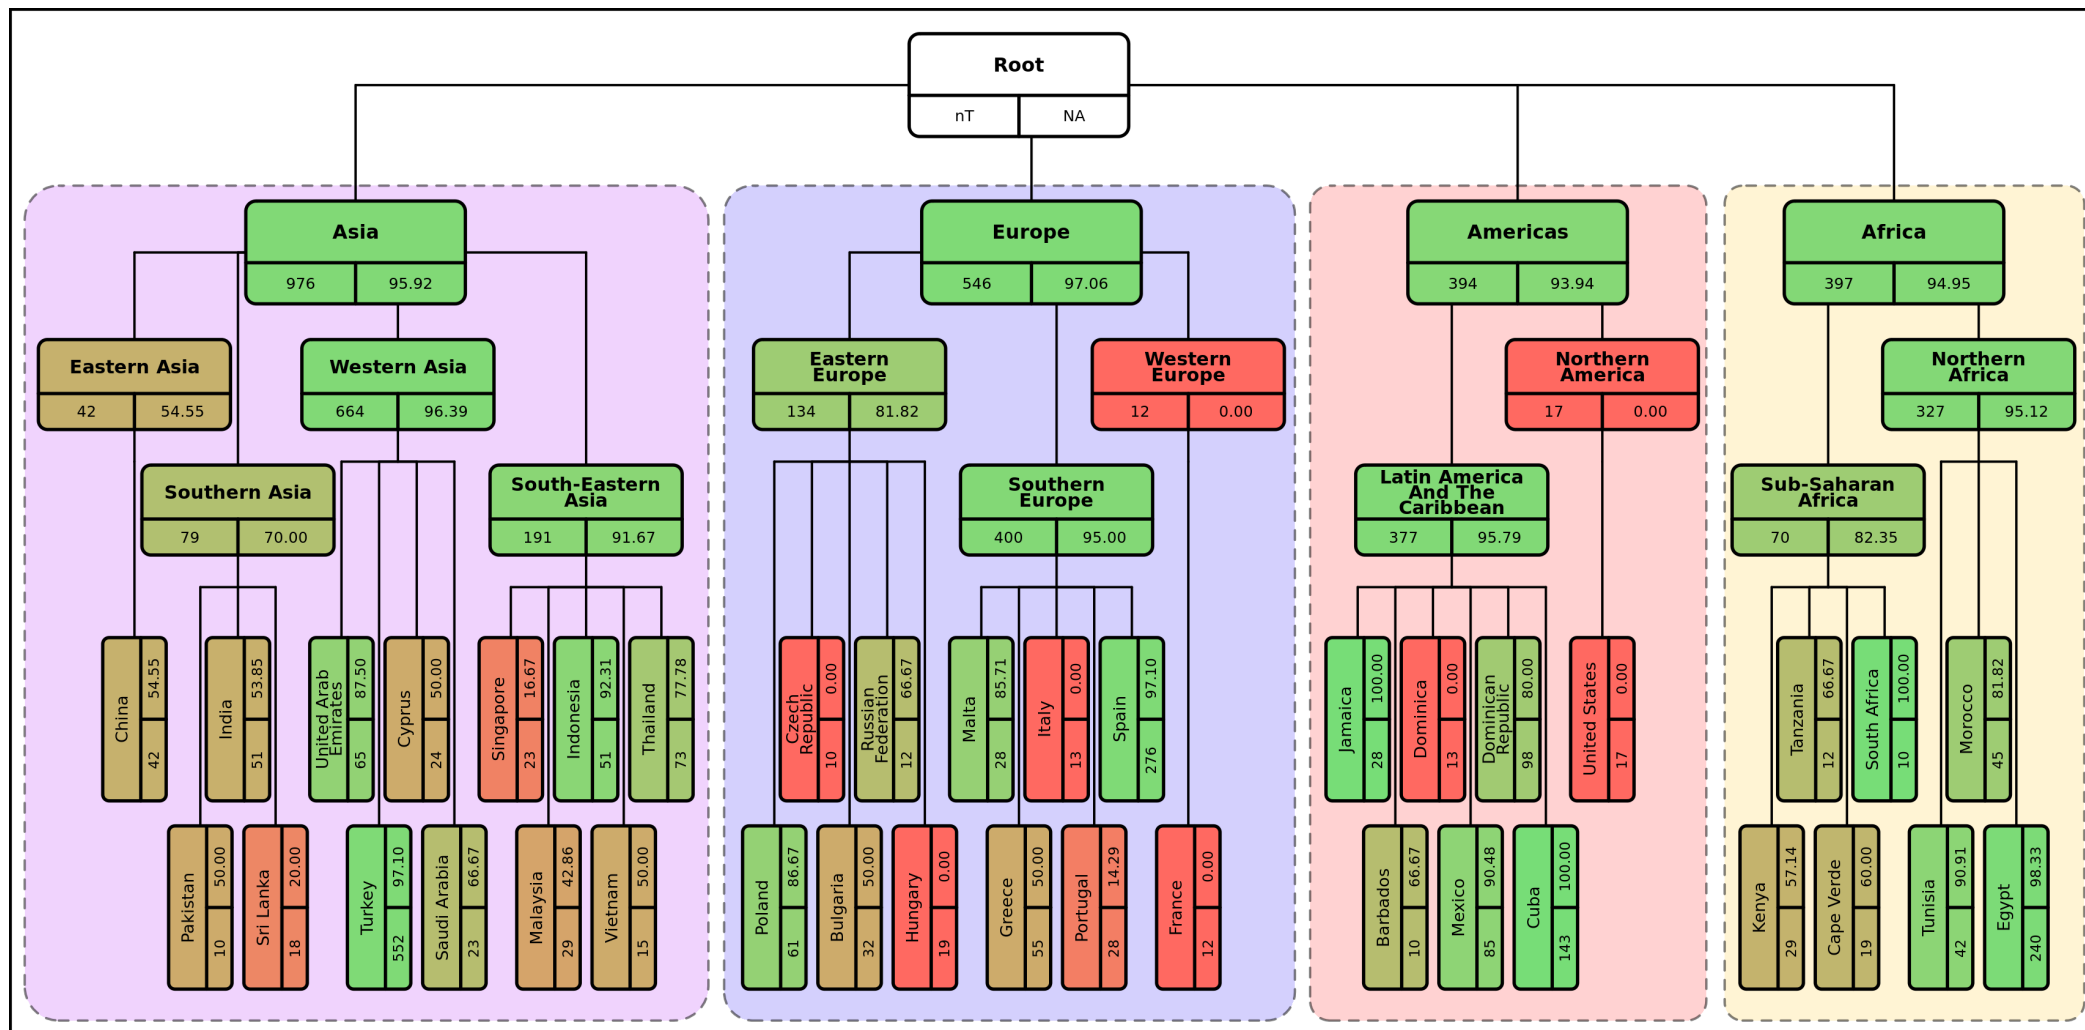

Supplement: supp [file elife_poa_e84167_Figure_3_figure_supplement_3.pdf › elife_poa_e84167_Figure_3_figure_supplement_3.pdf]
